# Supplementary material for: Synthesis of multi-substituted vinylsilanes via copper(i)-catalyzed hydrosilylation reactions of allenes and propiolate derivatives with silylboronates
Source: Royal Society of Chemistry journal article supplement (doi:10.1039/c4cc01722f), 2014-01-01

## Supporting Information

### **Synthesis of Multi-Substituted Vinylsilanes *via* Copper(I)-Catalyzed Hydrosilylation Reactions of Allenes and Propiolate Derivatives with Silylboronate**

**Yun-He Xu, \* Liu-Hai Wu, Jun Wang and Teck-Peng Loh\***

#### **Table contents**

|                                                                  |    |
|------------------------------------------------------------------|----|
| 1. General Procedures for synthesis of Allenes and Alkynes ..... | 2  |
| 2. General Procedure for the synthesis of Vinylsilanes .....     | 3  |
| 3. Mechanism study.....                                          | 4  |
| 4. Characterization Data for the Vinylsilanes .....              | 8  |
| 5. References .....                                              | 19 |
| 6. <sup>1</sup> H, <sup>13</sup> C spectra .....                 | 20 |

## 1. General Procedure for the Allenes and alkynes

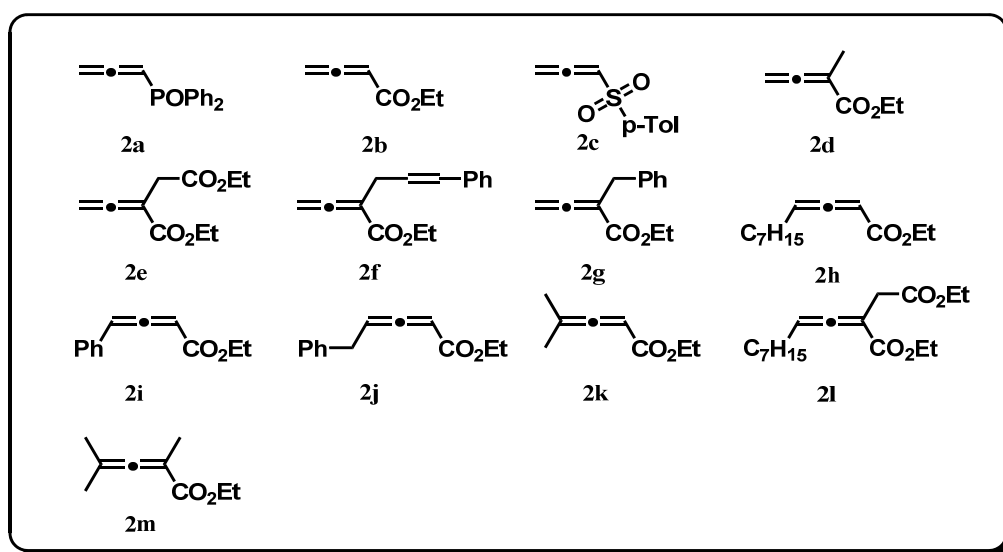

1b was commercially purchased, 1a<sup>1</sup>, 1c<sup>2</sup> and 1d – 1m<sup>3,4,5</sup> were prepared following the reported procedure.

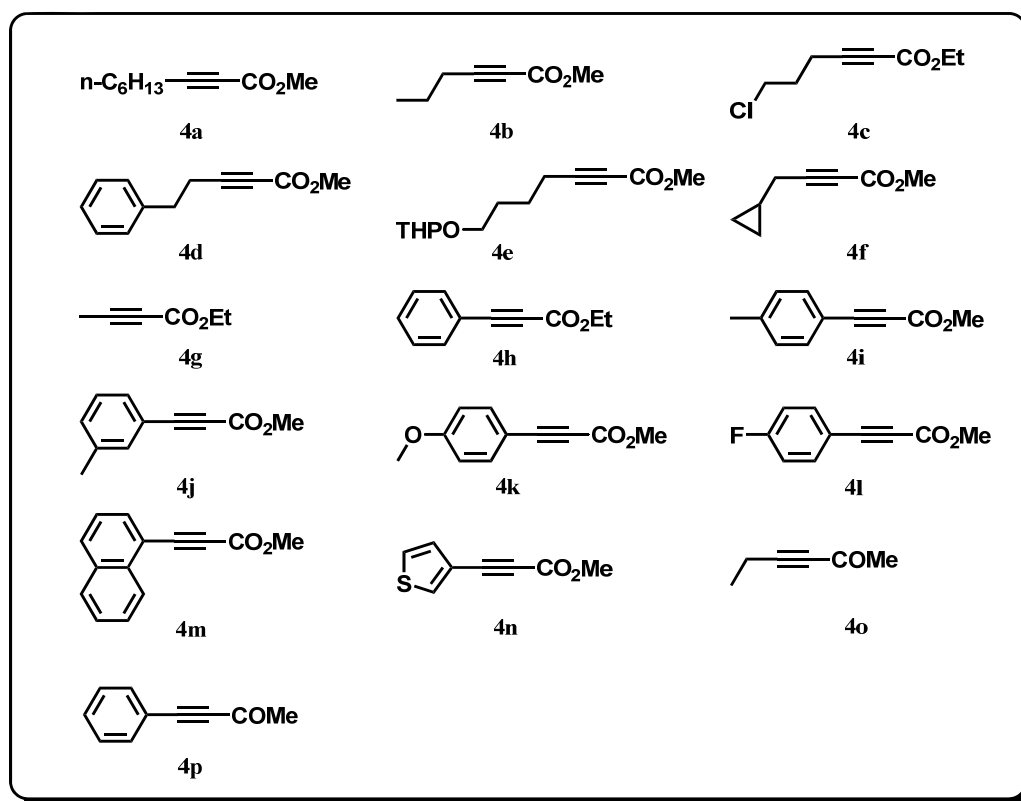

5a was commercially purchased, 5b – 5d<sup>6,7</sup>, 5o – 5p<sup>8</sup> were prepared following the reported procedure.



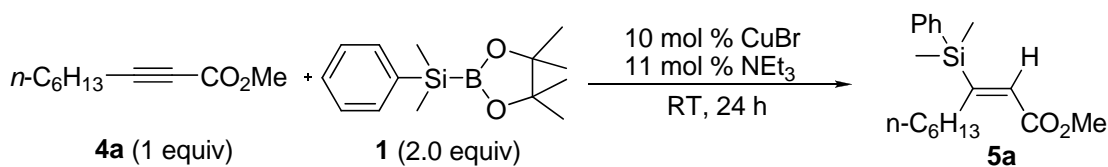

**Table 2**

| Contral condition                 | yield             |
|-----------------------------------|-------------------|
| no change                         | 92 % <sup>a</sup> |
| no CuBr and NEt <sub>3</sub>      | NR                |
| no NEt <sub>3</sub>               | 9 % <sup>b</sup>  |
| FeCl <sub>3</sub> instead of CuBr | NR                |
| NiBr <sub>2</sub> instead of CuBr | NR                |
| CuCl instead of CuBr              | 84 % <sup>a</sup> |
| NEt <sub>3</sub> 1 equiv          | 30% <sup>b</sup>  |

a. isolated yield  
b. NMR yield

**Proposed mechanism:**

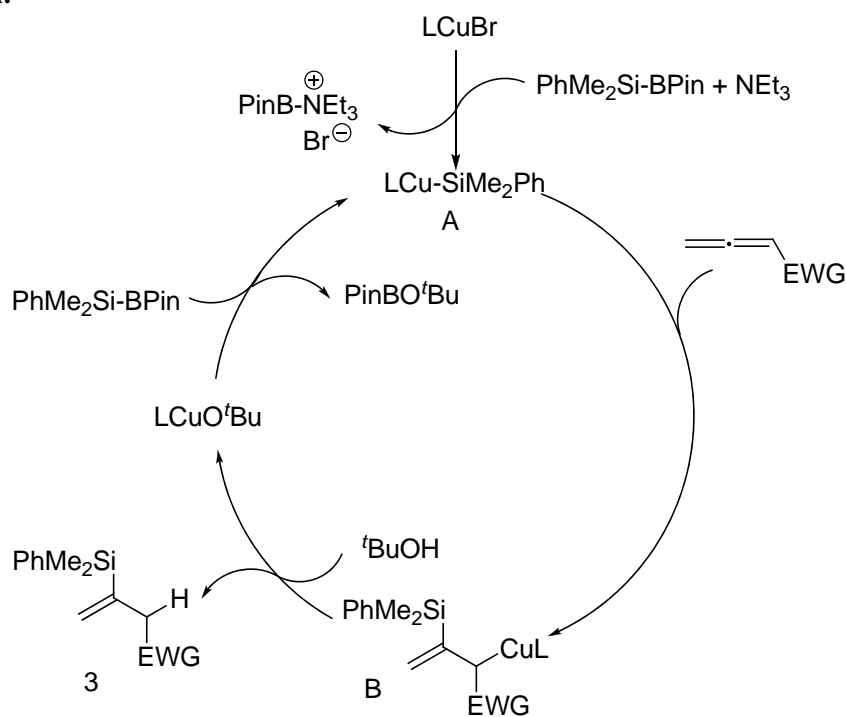

**Mechanism study:**

A chiral allene compound **2n** was prepared<sup>[9]</sup> and applied into the mechanism study of copper-catalyzed hydro-silylation reaction of allene. As depicted in the eq. 1, a racemic product **3n** was resulted from the chiral allene **2n** without any chirality transformation. Therefore, a possible reaction's pathway of an addition of Si-Cu into C=C double bond to afford an allylic copper species **B** which could then undergo protonolysis in the presence of <sup>t</sup>BuOH to give the desired product **3** was proposed in the text.

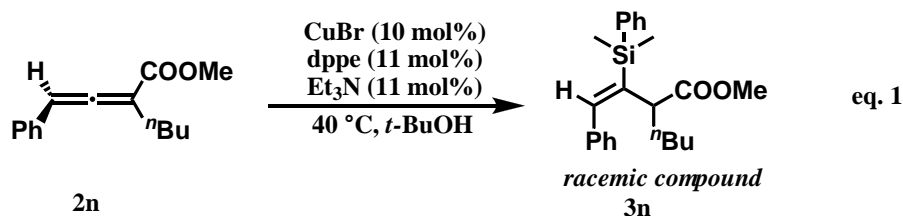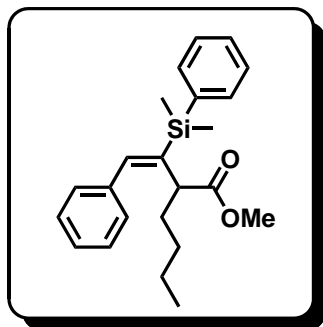

**3n** (E)-methyl 2-(1-(dimethyl(phenyl)silyl)-2-phenylvinyl)hexanoate  
Colorless oil.

**Yield** = 67 %

$^1\text{H NMR}$  (400 MHz,  $\text{CDCl}_3$ )  $\delta$  (ppm): 7.60 – 7.56 (m, 2H), 7.36 – 7.32 (m, 4H), 7.32 – 7.30 (m, 1H), 7.27 – 7.23 (m, 3H), 7.06 (s, 1H), 3.78 (dd,  $J_1 = 8.1$  Hz,  $J_2 = 6.6$  Hz, 1H), 3.44 (s, 3H), 1.88 – 1.76 (m, 1H), 1.42 – 1.32 (m, 1H), 1.06 – 0.92 (m, 4H), 0.71 (t,  $J = 6.9$  Hz, 3H), 0.47 (s, 3H), 0.46 (s, 3H).

$^{13}\text{C NMR}$  (100 MHz,  $\text{CDCl}_3$ )  $\delta$  (ppm): 174.8, 143.6, 140.3, 138.7, 138.1, 128.9, 128.4, 128.1, 127.6, 126.9, 51.4, 46.8, 31.0, 29.4, 22.2, 13.8, -1.2, -1.3.

HPLC conditions: Chiralcel OD-H, isopropanol/hexane = 0.1:99.9, flow: 1.0 mL/min,  $\lambda = 254$  nm.

FTIR (neat):  $\nu = 3064, 2958, 1732, 1594, 1422, 1252, 919, 813, 772, 740, 691$   $\text{cm}^{-1}$

HRMS (ESI, m/z): calcd for  $\text{C}_{23}\text{H}_{30}\text{O}_2\text{Si}^+$   $[\text{M}+\text{H}]^+$  367.2049, found: 367.2093.

File C:\HPCHEM\1\DATA\HYB\14042600.D

Sample Name: wlh30-3

Hexane: i-PrOH = 99.9:0.1; Flow = 1.0 mL/min; 23 degree  
e;  
50 bar; OD-H.

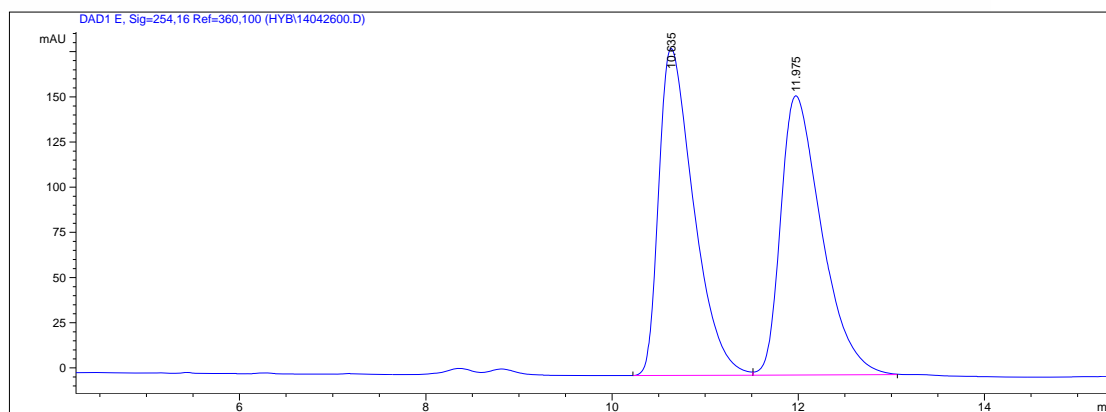

| Peak # | RetTime [min] | Type | Width [min] | Area [mAU*s] | Height [mAU] | Area %  |
|--------|---------------|------|-------------|--------------|--------------|---------|
| 1      | 10.635        | BV   | 0.3949      | 4697.53809   | 180.93880    | 49.9183 |
| 2      | 11.975        | VB   | 0.4639      | 4712.90576   | 154.50410    | 50.0817 |

File C:\HPCHEM\1\DATA\HYB\14042601.D

Sample Name: wlh30-4

Hexane: i-PrOH = 99.9:0.1; Flow = 1.0 mL/min; 23 degree  
e;  
50 bar; OD-H.

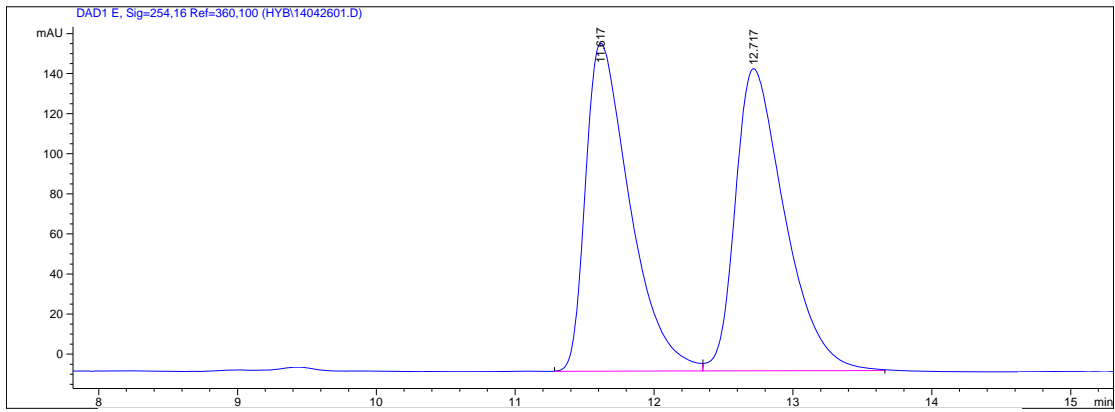

Signal 5: DAD1 E, Sig=254,16 Ref=360,100

| Peak # | RetTime [min] | Type | Width [min] | Area [mAU*s] | Height [mAU] | Area %  |
|--------|---------------|------|-------------|--------------|--------------|---------|
| 1      | 11.617        | BV   | 0.3348      | 3630.59424   | 163.67574    | 49.2980 |
| 2      | 12.717        | VB   | 0.3750      | 3733.99170   | 150.76077    | 50.7020 |

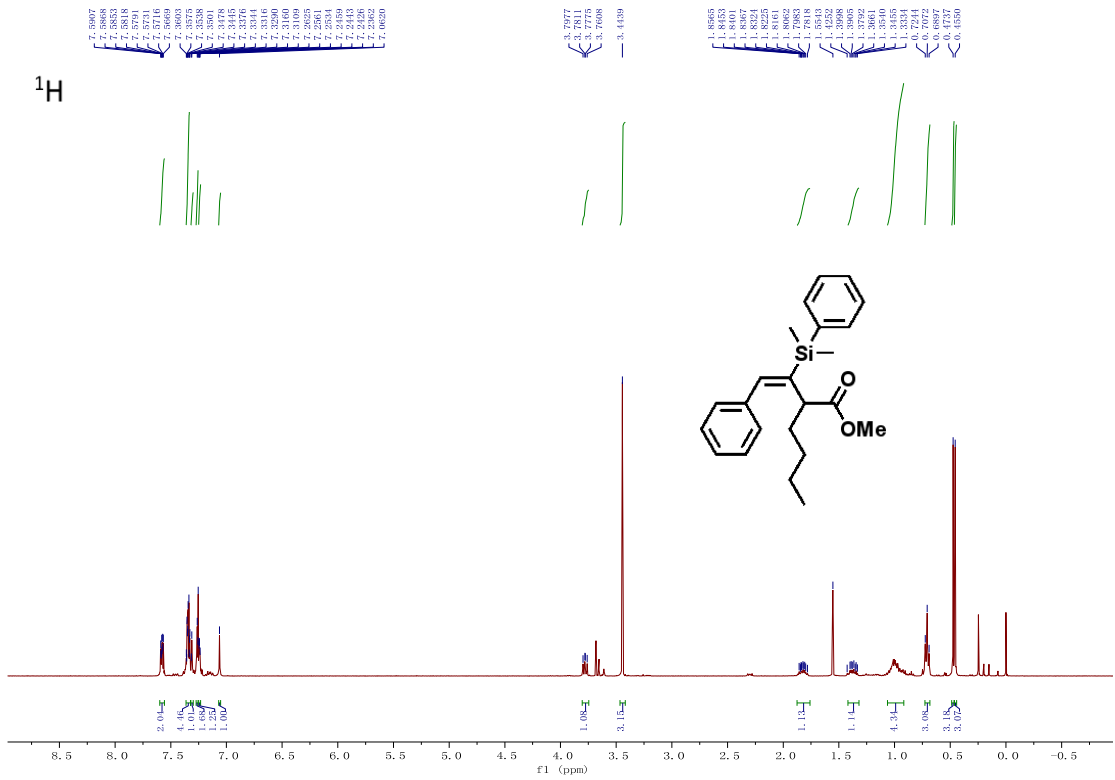

$^{13}\text{C}$

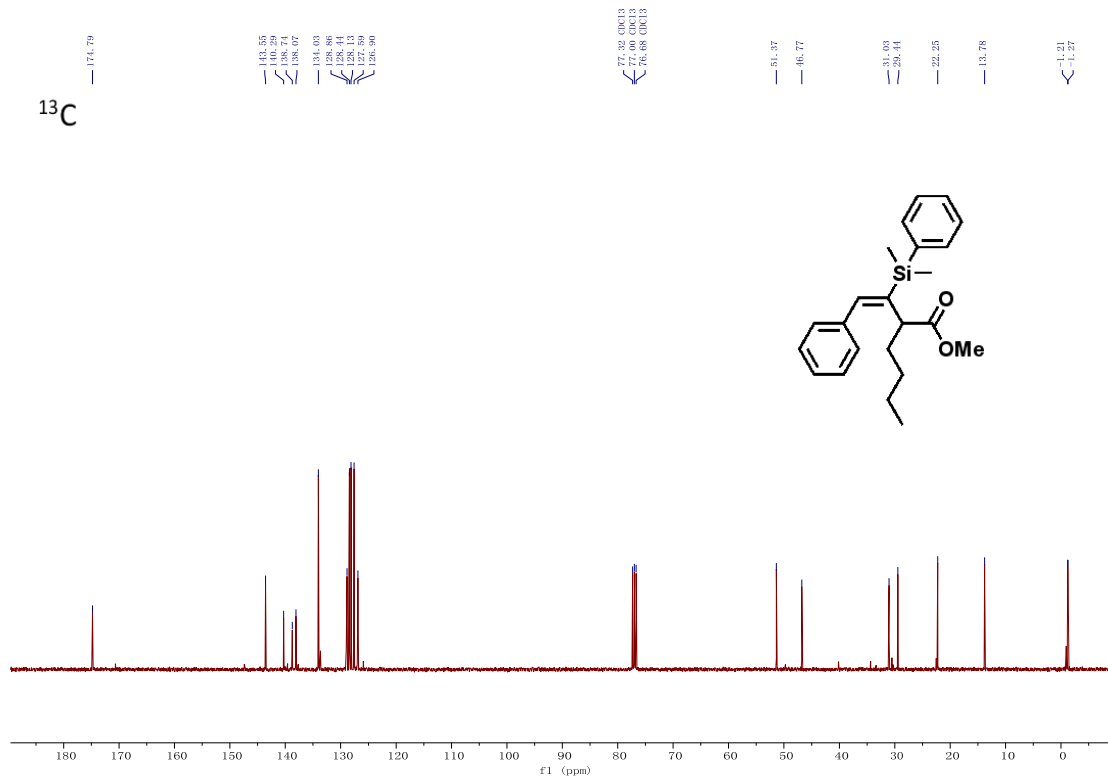

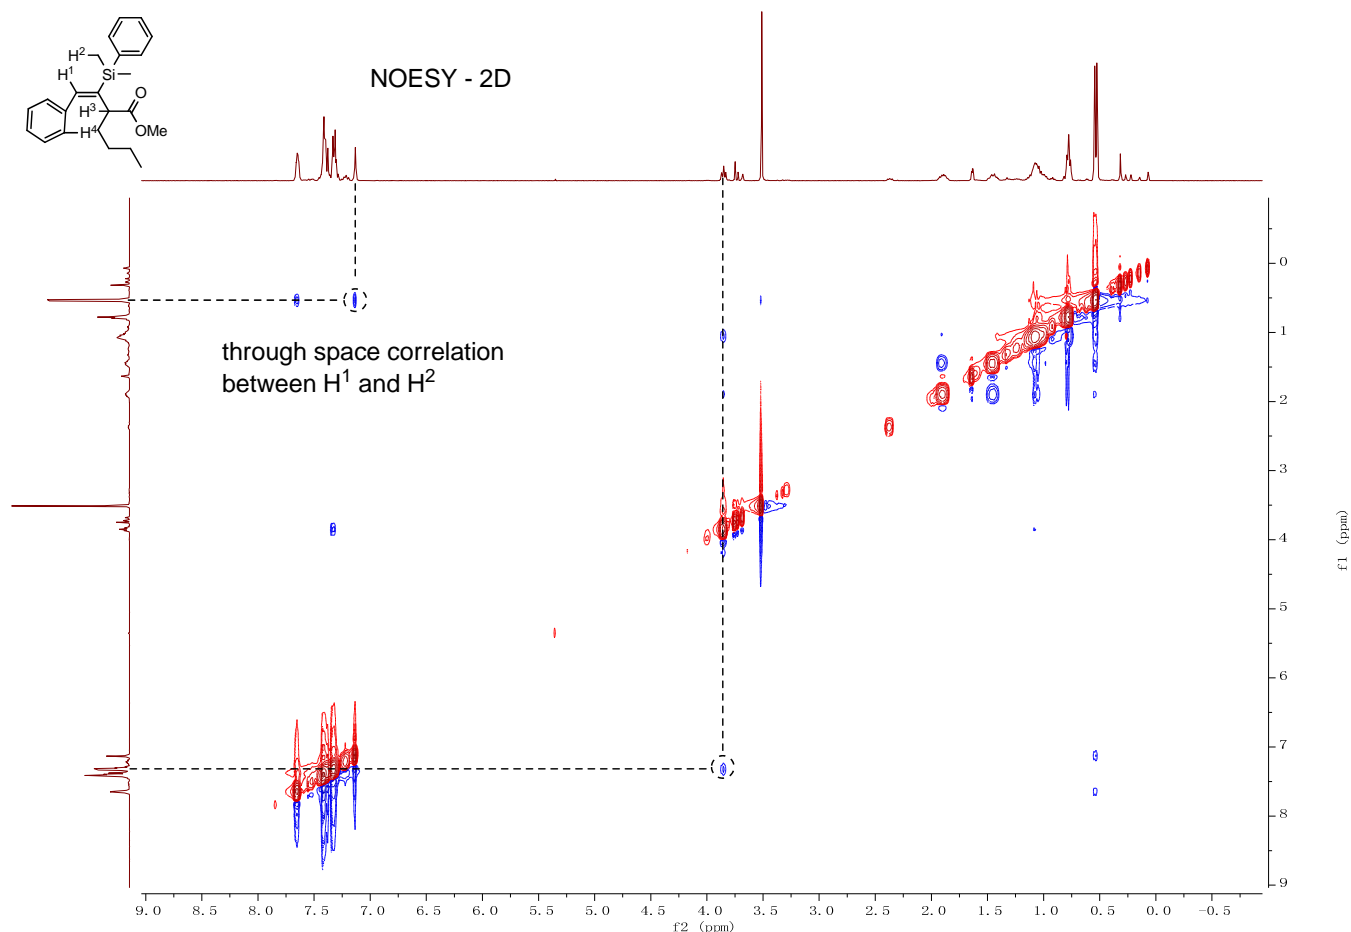

### 3. Characterization Data for the Vinylsilanes

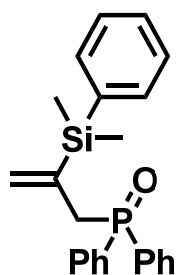

**3a** diphenyl[2-(dimethyl(phenyl)silyl)-propen-1-yl]-Phosphine oxide

Colorless oil.

**Yield** = 81%

$^1\text{H}$  NMR (400 MHz,  $\text{CDCl}_3$ )  $\delta$  (ppm): 7.69 – 7.60 (m, 4H), 7.52 – 7.44 (m, 4H), 7.44 – 7.38 (m, 4H), 7.38 – 7.30 (m, 3H), 6.00 (dt,  $J_1 = 5.1$  Hz,  $J_2 = 1.4$  Hz, 1H), 5.60 – 5.56 (m, 1H), 3.10 (d,  $J = 13.6$  Hz, 2H), 0.30 (s, 6H).

$^{13}\text{C}$  NMR (100 MHz,  $\text{CDCl}_3$ )  $\delta$  (ppm): 139.4 (d,  $J = 9.1$  Hz), 137.3, 134.0, 133.1 (d,  $J = 97.6$  Hz), 132.6 (d,  $J = 10.2$  Hz), 131.4 (d,  $J = 2.6$  Hz), 130.9 (d,  $J = 9.0$  Hz), 129.0, 128.3 (d,  $J = 11.5$  Hz), 127.7, 35.2 (d,  $J = 66.0$  Hz), -3.4.

$^{31}\text{P}$  NMR ( $\text{CDCl}_3$ )  $\delta$  (ppm): 29.6.

FTIR (neat):  $\nu = 3061, 2952, 1588, 1433, 1192, 931, 816, 696$   $\text{cm}^{-1}$

HRMS (ESI,  $m/z$ ): calcd for  $\text{C}_{23}\text{H}_{26}\text{OPSi}^+$   $[\text{M}+\text{H}]^+$  377.1491, found: 377.1491.



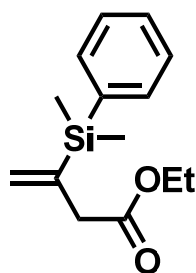

**3b** ethyl 3-(dimethyl(phenyl)silyl)but-3-enoate

Light yellow oil.

**Yield** = 83%

$^1\text{H NMR}$  (400 MHz,  $\text{CDCl}_3$ )  $\delta$  (ppm): 7.57 - 7.46 (m, 2H), 7.40 - 7.29 (m, 3H), 5.85 (dt,  $J_1 = 2.4$  Hz,  $J_2 = 1.1$  Hz, 1H), 5.61 - 5.55 (m, 1H), 4.00 (q,  $J = 7.2$  Hz, 2H), 3.09 (t,  $J = 1.1$  Hz, 2H), 1.17 (t,  $J = 7.2$  Hz, 3H), 0.40 (s, 6H);

$^{13}\text{C NMR}$  (100 MHz,  $\text{CDCl}_3$ )  $\delta$  (ppm): 171.7, 142.8, 137.3, 133.8, 130.2, 129.0, 127.6, 60.4, 41.6, 14.0, -3.2.

FTIR (neat):  $\nu = 3057, 2956, 1732, 1567, 1031, 931, 816, 776, 736, 701$   $\text{cm}^{-1}$ .

HRMS (ESI,  $m/z$ ): calcd for  $\text{C}_{14}\text{H}_{21}\text{O}_2\text{Si}^+$   $[\text{M}+\text{H}]^+$  249.1311, found: 249.1313.

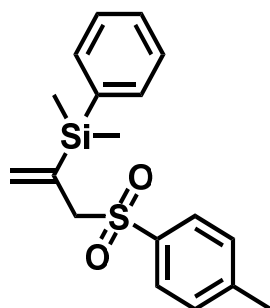

**3c** dimethyl(phenyl)(3-tosylprop-1-en-2-yl)silane

Colorless oil.

**Yield** = 68%

$^1\text{H NMR}$  (400 MHz,  $\text{CDCl}_3$ )  $\delta$  (ppm): 7.65 - 7.59 (m, 2H), 7.50 - 7.46 (m, 2H), 7.38 - 7.32 (m, 3H), 7.30 - 7.26 (m, 2H), 5.86 (dt,  $J_1 = 2.0$  Hz,  $J_2 = 0.9$  Hz, 1H), 5.73 (d,  $J = 2.0$  Hz, 1H), 3.79 (d,  $J = 0.9$  Hz, 2H), 2.43 (s, 3H), 0.41 (s, 6H).

$^{13}\text{C NMR}$  (100 MHz,  $\text{CDCl}_3$ )  $\delta$  (ppm): 144.3, 137.4, 136.8, 136.7, 135.8, 133.9, 129.4, 129.2, 128.5, 127.7, 61.6, 21.5, -3.0.

FTIR (neat):  $\nu = 3067, 2952, 1588, 1433, 1313, 1151$   $\text{cm}^{-1}$ .

HRMS (ESI,  $m/z$ ): calcd for  $\text{C}_{18}\text{H}_{23}\text{O}_2\text{SSi}^+$   $[\text{M}+\text{H}]^+$  331.1188, found: 331.1188.

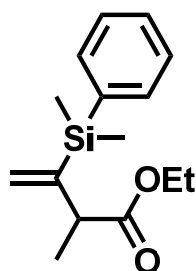

**3d** ethyl 3-(dimethyl(phenyl)silyl)-2-methylbut-3-enoate

Light yellow oil.

**Yield** = 81%

$^1\text{H NMR}$  (400 MHz,  $\text{CDCl}_3$ )  $\delta$  (ppm): 7.59 - 7.47 (m, 2H), 7.40 - 7.30 (m, 3H), 5.90 (dd,  $J_1 = 1.9$  Hz,  $J_2 = 1.1$  Hz, 1H), 5.67 (d,  $J = 1.9$  Hz, 1H), 4.05 - 3.88 (m, 2H), 3.23 (qd,  $J_1 = 7.1$  Hz,  $J_2 = 1.1$  Hz, 1H), 1.18 (d,  $J = 6.6$  Hz, 3H), 1.16 (t,  $J = 7.1$  Hz, 3H), 0.40 (s, 6H).

$^{13}\text{C NMR}$  (100 MHz,  $\text{CDCl}_3$ )  $\delta$  (ppm): 174.6, 149.1, 137.6, 133.9, 129.0, 127.8, 127.6, 60.2, 43.7, 17.6, 13.9, -2.8, -2.8.

FTIR (neat):  $\nu = 3057, 2956, 1732, 1567, 1031, 931, 816, 776, 736, 701$   $\text{cm}^{-1}$ .

HRMS (ESI,  $m/z$ ): calcd for  $\text{C}_{15}\text{H}_{23}\text{O}_2\text{Si}^+$   $[\text{M}+\text{H}]^+$  263.1467, found: 263.1467.

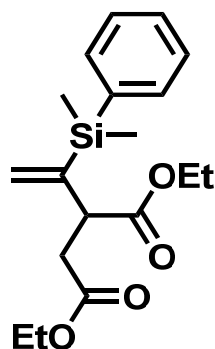

**3e** diethyl 2-(1-(dimethyl(phenyl)silyl)vinyl)succinate

Light yellow oil.

**Yield** = 77%

$^1\text{H NMR}$  (400 MHz,  $\text{CDCl}_3$ )  $\delta$  (ppm): 7.55 – 7.47 (m, 2H), 7.39 – 7.30 (m, 3H), 5.90 (s, 1H), 5.59 (s, 1H), 4.11 – 3.89 (m, 4H), 3.61 (dd,  $J_1 = 10.5$  Hz,  $J_2 = 4.8$  Hz, 1H), 2.85 (dd,  $J_1 = 16.8$  Hz,  $J_2 = 10.5$  Hz, 1H), 2.30 (dd,  $J_1 = 16.8$  Hz,  $J_2 = 4.8$  Hz, 1H), 1.20 (t,  $J = 7.2$  Hz, 3H), 1.16 (t,  $J = 7.2$  Hz, 3H), 0.43 (s, 3H), 0.42 (s, 3H).

$^{13}\text{C NMR}$  (100 MHz,  $\text{CDCl}_3$ )  $\delta$  (ppm): 173.0, 171.6, 146.7, 137.0, 133.9, 129.3, 129.1, 127.7, 60.6, 60.4, 45.2, 36.9, 14.0, 13.8, -2.9, -3.0.

FTIR (neat):  $\nu = 3061, 2956, 1732, 1567, 1031, 931, 816, 776, 736, 701$   $\text{cm}^{-1}$ .

HRMS (ESI, m/z): calcd for  $\text{C}_{18}\text{H}_{27}\text{O}_4\text{Si}^+$   $[\text{M}+\text{H}]^+$  335.1679, found: 335.1679.

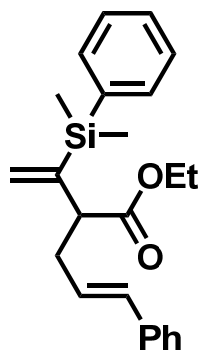

**3f** (E)-ethyl 2-(1-(dimethyl(phenyl)silyl)vinyl)-5-phenylpent-4-enoate

Light yellow oil.

**Yield** = 93%

$^1\text{H NMR}$  (400 MHz,  $\text{CDCl}_3$ )  $\delta$  (ppm): 7.59 – 7.49 (m, 2H), 7.41 – 7.31 (m, 3H), 7.29 – 7.24 (m, 4H), 7.23 – 7.16 (m, 1H), 6.38 (d,  $J = 15.8$  Hz, 1H), 6.08 – 6.00 (m, 2H), 5.69 – 5.61 (m, 1H), 4.07 – 3.92 (m, 2H), 3.24 (dd,  $J_1 = 9.2$  Hz,  $J_2 = 5.8$  Hz, 1H), 2.73 – 2.61 (m, 1H), 2.37 – 2.26 (m, 1H), 1.15 (tt,  $J_1 = 7.2$  Hz,  $J_2 = 0.72$  Hz, 3H), 0.43 (s, 3H), 0.43 (s, 3H).

$^{13}\text{C NMR}$  (100 MHz,  $\text{CDCl}_3$ )  $\delta$  (ppm): 173.3, 147.2, 137.3, 137.2, 134.0, 131.6, 129.0, 128.7, 128.3, 127.6, 127.4, 126.9, 125.9, 60.3, 49.6, 36.0, 13.9, -3.0, -3.1.

FTIR (neat):  $\nu = 3061, 2956, 1732, 1583, 1031, 931, 816, 776, 736, 701$   $\text{cm}^{-1}$ .

HRMS (ESI, m/z): calcd for  $\text{C}_{23}\text{H}_{29}\text{O}_2\text{Si}^+$   $[\text{M}+\text{H}]^+$  365.1937, found: 365.1937.

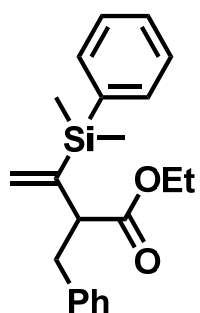

**3g** ethyl 2-benzyl-3-(dimethyl(phenyl)silyl)but-3-enoate

Light yellow oil.

**Yield** = 79% $^1\text{H NMR}$  (400 MHz,  $\text{CDCl}_3$ )  $\delta$  (ppm): 7.56 – 7.46 (m, 2H), 7.43 – 7.30 (m, 3H), 7.23 – 7.09 (m, 3H), 7.04 – 6.95 (m, 2H), 6.05 (dd,  $J_1 = 1.8$  Hz,  $J_2 = 1.8$  Hz, 1H), 5.64 (d,  $J = 1.8$  Hz, 1H), 3.91 (qd,  $J_1 = 7.2$  Hz,  $J_2 = 1.0$  Hz, 2H), 3.36 (qd,  $J_1 = 5.0$  Hz,  $J_2 = 0.8$  Hz, 1H), 3.07 (dd,  $J_1 = 13.6$  Hz,  $J_2 = 9.9$  Hz, 1H), 2.64 (dd,  $J_1 = 13.6$  Hz,  $J_2 = 5.1$  Hz, 1H), 1.06 (t,  $J = 7.2$  Hz, 3H), 0.39 (s, 3H), 0.38 (s, 3H). $^{13}\text{C NMR}$  (100 MHz,  $\text{CDCl}_3$ )  $\delta$  (ppm): 173.4, 147.7, 139.7, 137.2, 134.1, 129.2, 128.9, 128.7, 128.2, 127.8, 126.1, 60.3, 51.2, 38.9, 13.9, -3.1.FTIR (neat):  $\nu = 3061, 2956, 2927, 1732, 1583, 1207, 1157, 931, 816, 776, 736, 701$   $\text{cm}^{-1}$ .HRMS (ESI,  $m/z$ ): calcd for  $\text{C}_{21}\text{H}_{27}\text{O}_2\text{Si}^+$   $[\text{M}+\text{H}]^+$  339.1780, found: 339.1779.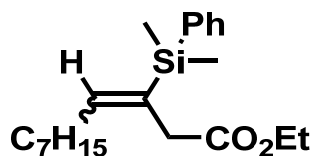**E/Z****3h** ethyl 3-(dimethyl(phenyl)silyl)undec-3-enoate

Light yellow oil.

**Yield** = 63%**E / Z** = 84:16 (**E** was determined by NMR 1D NOE) $^1\text{H NMR}$  (400 MHz,  $\text{CDCl}_3$ )  $\delta$  (ppm): 7.53 – 7.46 (m, 2H), 7.36 – 7.32 (m, 3H), 6.02 (tt,  $J_1 = 6.9$  Hz,  $J_2 = 1.0$  Hz, 1H), 3.97 (q,  $J = 7.2$  Hz, 2H), 3.1 (d,  $J = 1.0$  Hz, 2H), 2.16 (q,  $J = 7.2$  Hz, 2H), 1.32 – 1.24 (m, 10H), 1.15 (t,  $J = 7.2$  Hz, 3H), 0.88 (t,  $J = 7.2$  Hz, 3H), 0.36 (s, 6H). $^{13}\text{C NMR}$  (100 MHz,  $\text{CDCl}_3$ )  $\delta$  (ppm): 171.8, 146.6, 138.2, 133.9, 130.9, 128.8, 127.5, 60.2, 34.8, 31.7, 29.2, 29.1, 29.0, 28.9, 22.5, 14.0, 13.9, -3.0.FTIR (neat):  $\nu = 3061, 2956, 2927, 2856, 1732, 1567, 1162, 1031, 931, 816, 776, 736, 701$   $\text{cm}^{-1}$ .HRMS (ESI,  $m/z$ ): calcd for  $\text{C}_{21}\text{H}_{35}\text{O}_2\text{Si}^+$   $[\text{M}+\text{H}]^+$  347.2406, found: 347.2405.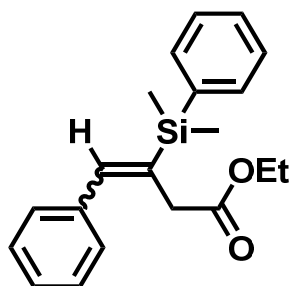**E/Z****3i** ethyl 3-(dimethyl(phenyl)silyl)-4-phenylbut-3-enoate

Light yellow oil.

**Yield** = 68%**E / Z** = 83:17 (**E** was determined by NMR 1D NOE) $^1\text{H NMR}$  (400 MHz,  $\text{CDCl}_3$ )  $\delta$  (ppm): 7.62 – 7.53 (m, 2H), 7.39 – 7.30 (m, 7H), 7.30 – 7.22 (m, 1H), 7.05 (s, 1H), 3.98 (q,  $J = 7.2$  Hz, 2H), 3.30 (d,  $J = 1.0$  Hz, 2H), 1.17 (t,  $J = 7.2$  Hz, 3H), 0.47 (s, 6H). $^{13}\text{C NMR}$  (100 MHz,  $\text{CDCl}_3$ )  $\delta$  (ppm): 172.0, 143.1, 139.1, 137.3, 134.6, 134.0, 129.0, 128.4, 128.1, 127.6, 127.1, 60.5, 36.1, 13.9, -2.9.FTIR (neat):  $\nu = 3061, 2956, 2927, 1732, 1598, 1252, 1162, 1106, 1032, 816, 776, 736, 701$   $\text{cm}^{-1}$ .HRMS (ESI,  $m/z$ ): calcd for  $\text{C}_{20}\text{H}_{25}\text{O}_2\text{Si}^+$   $[\text{M}+\text{H}]^+$  325.1624, found: 325.1626.

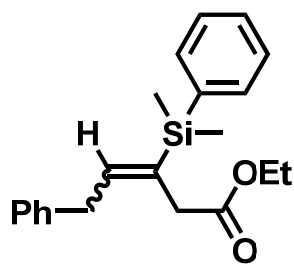

**E/Z**

**3j** ethyl 3-(dimethyl(phenyl)silyl)-5-phenylpent-3-enoate

Light yellow oil.

**Yield** = 59%

**E / Z** = 80:20 (**E** was determined by NMR 1D NOE)

<sup>1</sup>H NMR (400 MHz, CDCl<sub>3</sub>) δ (ppm): 7.55 – 7.46 (m, 2H), 7.37 – 7.27 (m, 5H), 7.23 – 7.17 (m, 3H), 6.20 (tt, *J*<sub>1</sub> = 6.9 Hz, *J*<sub>2</sub> = 1.0 Hz, 1H), 3.98 (q, *J* = 7.2 Hz, 2H), 3.55 (d, *J* = 6.9 Hz, 2H), 3.21 (d, *J* = 1.0 Hz, 2H), 1.16 (t, *J* = 7.2 Hz, 3H), 0.38 (s, 6H).

<sup>13</sup>C NMR (100 MHz, CDCl<sub>3</sub>) δ (ppm): 171.6, 144.0, 140.1, 137.8, 134.0, 132.4, 128.9, 128.4, 128.3, 127.6, 125.9, 60.4, 35.2, 34.9, 14.0, -3.1.

FTIR (neat): ν = 3057, 2956, 2927, 1732, 1598, 1252, 1162, 1106, 1032, 816, 776, 736, 701 cm<sup>-1</sup>.

HRMS (ESI, m/z): calcd for C<sub>21</sub>H<sub>27</sub>O<sub>2</sub>Si<sup>+</sup> [M+H]<sup>+</sup> 339.1780, found: 339.1783.

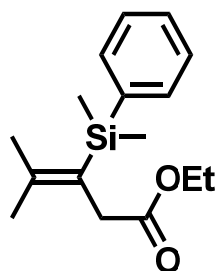

**3k** ethyl 3-(dimethyl(phenyl)silyl)-4-methylpent-3-enoate

Light yellow oil.

**Yield** = 90%

<sup>1</sup>H NMR (400 MHz, CDCl<sub>3</sub>) δ (ppm): 7.61 – 7.50 (m, 2H), 7.37 – 7.33 (m, 3H), 4.09 (q, *J* = 7.2 Hz, 2H), 3.20 (s, 2H), 1.80 (s, 3H), 1.72 (s, 3H), 1.22 (t, *J* = 7.2 Hz, 3H), 0.40 (s, 6H).

<sup>13</sup>C NMR (100 MHz, CDCl<sub>3</sub>) δ (ppm): 172.6, 149.1, 140.0, 133.7, 128.4, 127.5, 123.1, 60.2, 37.4, 26.0, 21.6, 14.1, -0.90.

FTIR (neat): ν = 3061, 2956, 2927, 1732, 1567, 1252, 1162, 1106, 1032, 816, 776, 736, 701 cm<sup>-1</sup>.

HRMS (ESI, m/z): calcd for C<sub>16</sub>H<sub>25</sub>O<sub>2</sub>Si<sup>+</sup> [M+H]<sup>+</sup> 277.1624, found: 277.1626.

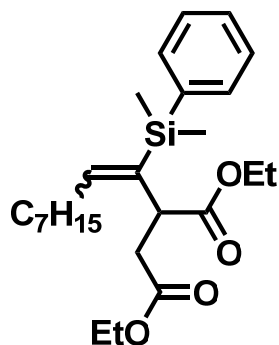

**E/Z**

**3l** diethyl 2-(1-(dimethyl(phenyl)silyl)non-1-enyl)succinate

Light yellow oil.

**Yield** = 68%

**E / Z** = 81:19 (**E** was determined by NMR 1D NOE)

$^1\text{H}$  NMR (400 MHz,  $\text{CDCl}_3$ )  $\delta$  (ppm): 7.52 – 7.45 (m, 2H), 7.34 – 7.31 (m, 3H), 5.95 (t,  $J = 7.0$  Hz, 1H), 4.07 (q,  $J = 7.2$  Hz, 2H), 4.02 – 3.91 (m, 2H), 3.84 – 3.76 (m, 1H), 2.93 (dd,  $J_1 = 16.6$  Hz,  $J_2 = 9.9$  Hz, 1H), 2.29 – 2.19 (m, 1H), 2.19 – 2.09 (m, 2H), 1.34 – 1.23 (m, 10H), 1.21 (t,  $J = 7.2$  Hz, 3H), 1.13 (t,  $J = 7.2$  Hz, 3H), 0.88 (t,  $J = 7.2$  Hz, 3H), 0.39 (s, 3H), 0.36 (s, 3H).

$^{13}\text{C}$  NMR (100 MHz,  $\text{CDCl}_3$ )  $\delta$  (ppm): 173.5, 171.8, 147.0, 138.4, 135.1, 133.9, 128.8, 127.5, 60.5, 60.4, 42.2, 36.0, 31.7, 29.3, 29.2, 29.1, 29.0, 22.5, 14.0, 13.9, 13.8, -1.9, -2.0.

FTIR (neat):  $\nu = 3061, 2956, 2927, 1732, 1567, 1252, 1162, 1106, 1032, 816, 776, 736, 701\text{ cm}^{-1}$ .

HRMS (ESI,  $m/z$ ): calcd for  $\text{C}_{25}\text{H}_{41}\text{O}_4\text{Si}^+$   $[\text{M}+\text{H}]^+$  433.2774, found: 433.2776.

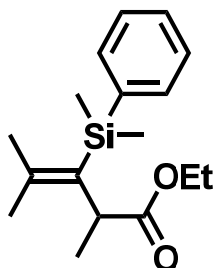

**3m** ethyl 3-(dimethyl(phenyl)silyl)-2,4-dimethylpent-3-enoate

Colorless oil.

**Yield** = 74%

$^1\text{H}$  NMR (400 MHz,  $\text{CDCl}_3$ )  $\delta$  (ppm): 7.61 – 7.51 (m, 2H), 7.38 – 7.28 (m, 3H), 4.20 – 4.03 (m, 2H), 3.57 (q,  $J = 7.2$  Hz, 1H), 1.76 (s, 3H), 1.63 (s, 3H), 1.31 (d,  $J = 7.2$  Hz, 3H), 1.24 (t,  $J = 7.2$  Hz, 3H), 0.37 (s, 3H), 0.32 (s, 3H).

$^{13}\text{C}$  NMR (100 MHz,  $\text{CDCl}_3$ )  $\delta$  (ppm): 176.0, 146.2, 140.8, 133.5, 130.5, 128.3, 127.5, 60.4, 42.2, 26.4, 21.5, 16.7, 14.1, -0.3, -0.2.

FTIR (neat):  $\nu = 3057, 2956, 2927, 1732, 1602, 1252, 1201, 1101, 816, 776, 736, 701\text{ cm}^{-1}$ .

HRMS (ESI,  $m/z$ ): calcd for  $\text{C}_{17}\text{H}_{27}\text{O}_2\text{Si}^+$   $[\text{M}+\text{H}]^+$  291.1780, found: 291.1779.

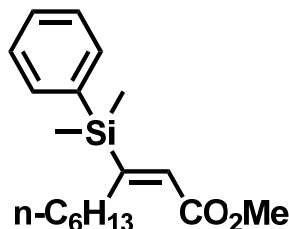

**5a** (E)-methyl 3-(dimethyl(phenyl)silyl)non-2-enoate

Light yellow oil.

**Yield** = 92%

$^1\text{H}$  NMR (400 MHz,  $\text{CDCl}_3$ )  $\delta$  (ppm): 7.52 – 7.47 (m, 2H), 7.39 – 7.32 (m, 3H), 6.06 (t,  $J = 0.8$  Hz, 1H), 3.69 (s, 3H), 2.62 (t,  $J = 7.4$  Hz, 2H), 1.30 – 1.17 (m, 8H), 0.84 (t,  $J = 7.2$  Hz, 3H), 0.42 (s, 6H).

$^{13}\text{C}$  NMR (100 MHz,  $\text{CDCl}_3$ )  $\delta$  (ppm): 165.6, 165.2, 136.6, 134.0, 129.4, 127.9, 127.3, 50.9, 31.7, 31.5, 29.8, 29.6, 22.5, 14.0, -3.3.

FTIR (neat):  $\nu = 3072, 2949, 2857, 1728, 1591, 1431, 1248, 1198, 1170, 807, 756, 730, 700\text{ cm}^{-1}$ .

HRMS (ESI,  $m/z$ ): calcd for  $\text{C}_{18}\text{H}_{29}\text{O}_2\text{Si}^+$   $[\text{M}+\text{H}]^+$  305.1937, found: 305.1940.

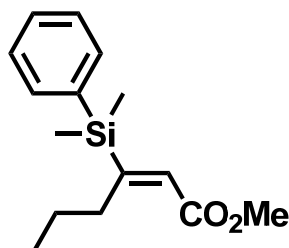

**5b** (E)-methyl 3-(dimethyl(phenyl)silyl)hex-2-enoate

Light yellow oil.

**Yield** = 75%

$^1\text{H NMR}$  (400 MHz,  $\text{CDCl}_3$ )  $\delta$  (ppm): 7.53 – 7.47 (m, 2H), 7.39 – 7.33 (m, 3H), 6.07 (t,  $J = 0.8$  Hz, 1H), 3.69 (s, 3H), 2.66 – 2.58 (m, 2H), 1.38 – 1.30 (m, 2H), 0.88 (t,  $J = 7.2$  Hz, 3H), 0.42 (s, 1H).

$^{13}\text{C NMR}$  (100 MHz,  $\text{CDCl}_3$ )  $\delta$  (ppm): 166.7, 165.0, 136.6, 134.0, 129.4, 127.9, 127.5, 50.9, 33.7, 23.1, 14.5, -3.3.

FTIR (neat):  $\nu = 3077, 2966, 2865, 1714, 1591, 1419, 1248, 1187, 1106, 832, 770, 740, 700\text{ cm}^{-1}$ .

HRMS (ESI,  $m/z$ ): calcd for  $\text{C}_{15}\text{H}_{23}\text{O}_2\text{Si}^+$   $[\text{M}+\text{H}]^+$  263.1467, found: 263.1469.

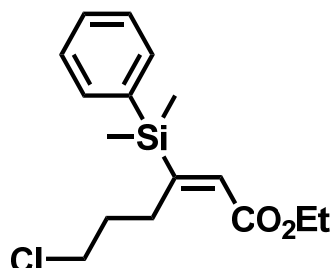

**5c** (E)-ethyl 6-chloro-3-(dimethyl(phenyl)silyl)hex-2-enoate

Light yellow oil.

**Yield** = 93%

$^1\text{H NMR}$  (400 MHz,  $\text{CDCl}_3$ )  $\delta$  (ppm): 7.53 – 7.48 (m, 2H), 7.41 – 7.34 (m, 2H), 6.12 (t,  $J = 0.8$  Hz, 1H), 4.16 (q,  $J = 7.2$  Hz, 2H), 3.47 (t,  $J = 6.6$  Hz, 2H), 2.74 (t,  $J = 7.8$  Hz, 2H), 1.80 – 1.71 (m, 2H), 1.29 (t,  $J = 7.2$  Hz, 3H), 0.45 (s, 6H).

$^{13}\text{C NMR}$  (100 MHz,  $\text{CDCl}_3$ )  $\delta$  (ppm): 165.1, 162.8, 136.1, 134.0, 129.6, 128.9, 128.0, 59.9, 45.2, 32.4, 29.0, 14.3, -3.4.

FTIR (neat):  $\nu = 3068, 2966, 2854, 1706, 1594, 1431, 1258, 1177, 1146, 1106, 811, 770, 740, 689\text{ cm}^{-1}$ .

HRMS (ESI,  $m/z$ ): calcd for  $\text{C}_{16}\text{H}_{24}\text{ClO}_2\text{Si}^+$   $[\text{M}+\text{H}]^+$  311.1234, found: 311.1236.

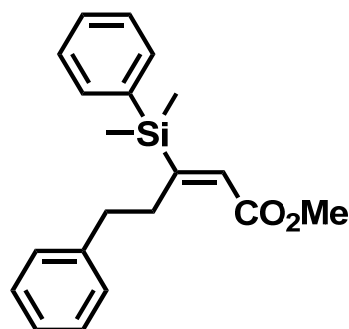

**5d** (E)-methyl 3-(dimethyl(phenyl)silyl)-5-phenylpent-2-enoate

Light yellow oil.

**Yield** = 89%

$^1\text{H NMR}$  (400 MHz,  $\text{CDCl}_3$ )  $\delta$  (ppm): 7.56 – 7.52 (m, 2H), 7.42 – 7.37 (m, 3H), 7.27 – 7.22 (m, 2H), 7.18 – 7.10 (m, 3H), 6.16 (t,  $J = 0.8$  Hz, 1H), 3.73 (s, 3H), 2.92 – 2.84 (m, 2H), 2.56 – 2.48 (m, 2H), 0.47 (s, 6H).

$^{13}\text{C NMR}$  (100 MHz,  $\text{CDCl}_3$ )  $\delta$  (ppm): 166.4, 164.1, 142.1, 136.2, 134.1, 129.6, 128.4, 128.3, 128.0, 127.9, 125.8, 51.0, 35.8, 34.2, -3.5.

FTIR (neat):  $\nu = 3068, 3028, 2956, 2854, 1952, 1887, 1716, 1594, 1432, 1340, 1248, 1197, 1157, 1106, 830, 781, 732, 692\text{ cm}^{-1}$ .

HRMS (ESI,  $m/z$ ): calcd for  $\text{C}_{20}\text{H}_{25}\text{O}_2\text{Si}^+$   $[\text{M}+\text{H}]^+$  325.1624, found: 325.1625.

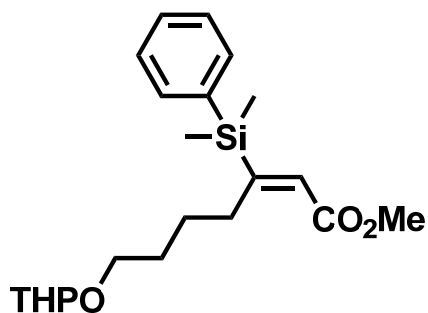

**THPO**

**5e** (E)-methyl 3-(dimethyl(phenyl)silyl)-7-(tetrahydro-2H-pyran-2-yloxy)hept-2-enoate

Light yellow oil.

**Yield** = 83%

$^1\text{H NMR}$  (400 MHz,  $\text{CDCl}_3$ )  $\delta$  (ppm): 7.53 – 7.46 (m, 2H), 7.41 – 7.32 (m, 3H), 6.07 (t,  $J = 0.8$  Hz, 1H), 4.53 (t,  $J = 2.8$  Hz, 1H), 3.88 – 3.77 (m, 1H), 3.71 – 3.68 (m, 3H), 3.68 – 3.61 (m, 1H), 3.51 – 3.43 (m, 1H), 3.35 – 3.26 (m, 1H), 2.67 (t,  $J = 8.0$  Hz, 2H), 1.86 – 1.74 (m, 1H), 1.70 – 1.47 (m, 7H), 1.43 – 1.27 (m, 2H), 0.42 (s, 6H).

$^{13}\text{C NMR}$  (100 MHz,  $\text{CDCl}_3$ )  $\delta$  (ppm): 166.6, 164.8, 136.5, 134.0, 129.4, 127.9, 127.7, 98.6, 67.1, 62.2, 50.9, 31.3, 30.7, 30.1, 26.3, 25.5, 19.6, -3.3.

FTIR (neat):  $\nu = 3072, 2942, 2868, 1723, 1602, 1422, 1350, 1252, 1204, 1196, 1162, 1114, 1173, 1037, 813, 773, 737, 704\text{ cm}^{-1}$ .

HRMS (ESI,  $m/z$ ): calcd for  $\text{C}_{21}\text{H}_{33}\text{O}_4\text{Si}^+$   $[\text{M}+\text{H}]^+$  377.2148, found: 377.2146.

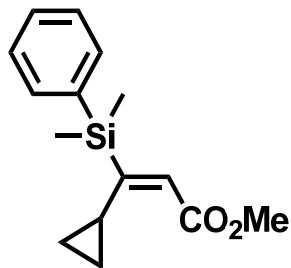

**5f** (E)-methyl 3-cyclopropyl-3-(dimethyl(phenyl)silyl)acrylate

Light yellow oil.

**Yield** = 85%

$^1\text{H NMR}$  (400 MHz,  $\text{CDCl}_3$ )  $\delta$  (ppm): 7.51 – 7.46 (m, 2H), 7.39 – 7.32 (m, 3H), 6.14 (d,  $J = 1.4$  Hz, 1H), 3.72 (s, 3H), 2.75 – 2.65 (m, 1H), 0.82 – 0.73 (m, 2H), 0.53 – 0.48 (m, 2H), 0.41 (s, 6H).

$^{13}\text{C NMR}$  (100 MHz,  $\text{CDCl}_3$ )  $\delta$  (ppm): 166.4, 164.6, 137.2, 133.8, 129.4, 129.0, 127.9, 51.0, 15.3, 7.9, -1.7.

FTIR (neat):  $\nu = 3072, 3016, 2956, 1716, 1578, 1432, 1256, 1187, 1114, 1017, 813, 772, 733, 700\text{ cm}^{-1}$ .

HRMS (ESI,  $m/z$ ): calcd for  $\text{C}_{15}\text{H}_{21}\text{O}_2\text{Si}^+$   $[\text{M}+\text{H}]^+$  261.1311, found: 261.1317.

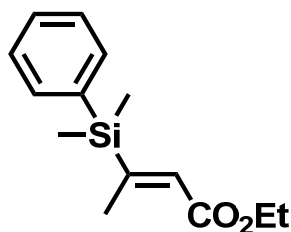

**5g** (E)-ethyl 3-(dimethyl(phenyl)silyl)but-2-enoate

Light yellow oil.

**Yield** = 94%

$^1\text{H NMR}$  (400 MHz,  $\text{CDCl}_3$ )  $\delta$  (ppm): 7.53 – 7.46 (m, 2H), 7.41 – 7.33 (m, 3H), 6.09 (q,  $J = 1.8$  Hz, 1H), 4.17 (q,  $J = 7.1$  Hz, 2H), 2.19 (d,  $J = 1.8$  Hz, 3H), 1.29 (t,  $J = 7.1$  Hz, 3H), 0.41 (s, 6H).

$^{13}\text{C NMR}$  (100 MHz,  $\text{CDCl}_3$ )  $\delta$  (ppm): 166.7, 159.9, 136.2, 134.0, 129.4, 127.9, 127.8, 59.7, 17.5, 14.3, -4.0.

FTIR (neat):  $\nu = 3072, 3048, 2958, 1716, 1617, 1422, 1342, 1249, 1179, 1114, 1033, 838, 813, 773, 732, 700\text{ cm}^{-1}$ .

HRMS (ESI,  $m/z$ ): calcd for  $\text{C}_{14}\text{H}_{21}\text{O}_2\text{Si}^+$   $[\text{M}+\text{H}]^+$  249.1311, found: 249.1308.

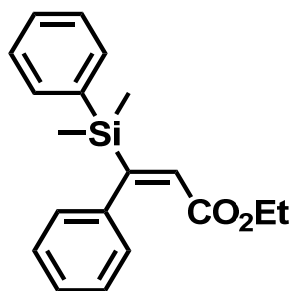

**5h** (E)-ethyl 3-(dimethyl(phenyl)silyl)-3-phenylacrylate

Light yellow oil.

**Yield** = 91%

$^1\text{H NMR}$  (400 MHz,  $\text{CDCl}_3$ )  $\delta$  (ppm): 7.34 – 7.28 (m, 2H), 7.23 – 7.15 (m, 3H), 7.08 – 6.98 (m, 3H), 6.07 – 6.03 (m, 2H), 6.05 (s, 1H), 3.76 (q,  $J = 7.1$  Hz, 2H), 0.81 (t,  $J = 7.1$  Hz, 3H), 0.21 (s, 6H).

$^{13}\text{C NMR}$  (100 MHz,  $\text{CDCl}_3$ )  $\delta$  (ppm): 166.3, 161.2, 141.1, 135.6, 134.2, 129.5, 129.4, 127.9, 127.6, 126.0, 125.9, 59.9, 13.8, -3.7.

FTIR (neat):  $\nu = 3072, 3024, 2968, 2893, 1951, 1878, 1723, 1602, 1488, 1431, 1366, 1252, 1187, 1162, 1114, 1033, 838, 806, 781, 732, 700 \text{ cm}^{-1}$ .

HRMS (ESI,  $m/z$ ): calcd for  $\text{C}_{19}\text{H}_{23}\text{O}_2\text{Si}^+$   $[\text{M}+\text{H}]^+$  311.1467, found: 311.1469.

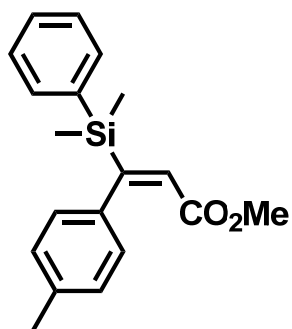

**5i** (E)-methyl 3-(dimethyl(phenyl)silyl)-3-p-tolylacrylate

Light yellow oil.

**Yield** = 71%

$^1\text{H NMR}$  (400 MHz,  $\text{CDCl}_3$ )  $\delta$  (ppm): 7.53 – 7.46 (m, 2H), 7.43 – 7.33 (m, 3H), 7.08 (d,  $J = 7.9$  Hz, 2H), 6.76 (d,  $J = 7.9$  Hz, 2H), 6.22 (s, 1H), 3.54 (s, 3H), 2.33 (s, 3H), 0.39 (s, 6H).

$^{13}\text{C NMR}$  (100 MHz,  $\text{CDCl}_3$ )  $\delta$  (ppm): 166.5, 162.3, 137.8, 135.8, 135.6, 134.2, 129.5, 128.6, 128.5, 127.9, 125.8, 51.0, 21.2, -3.7.

FTIR (neat):  $\nu = 3072, 3016, 2951, 1736, 1602, 1432, 1252, 1204, 1163, 1114, 1032, 871, 814, 773, 741, 700 \text{ cm}^{-1}$ .

HRMS (ESI,  $m/z$ ): calcd for  $\text{C}_{19}\text{H}_{23}\text{O}_2\text{Si}^+$   $[\text{M}+\text{H}]^+$  311.1467, found: 311.1463.

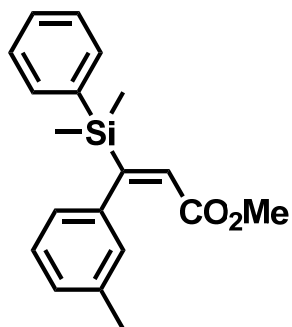

**5j** (E)-methyl 3-(dimethyl(phenyl)silyl)-3-m-tolylacrylate

Light yellow oil.

**Yield** = 72%



$^1\text{H}$  NMR (400 MHz,  $\text{CDCl}_3$ )  $\delta$  (ppm): 7.50 – 7.44 (m, 2H), 7.40 – 7.33 (m, 3H), 7.14 (t,  $J = 7.6$  Hz, 1H), 7.02 – 6.97 (m, 1H), 6.66 – 6.59 (m, 2H), 6.19 (s, 1H), 3.51 (s, 3H), 2.27 (s, 3H), 0.37 (s, 6H).  
 $^{13}\text{C}$  NMR (100 MHz,  $\text{CDCl}_3$ )  $\delta$  (ppm): 166.5, 162.2, 140.8, 137.1, 135.7, 134.2, 129.6, 128.5, 127.9, 127.6, 126.9, 126.5, 123.0, 51.1, 21.5, -3.7.  
FTIR (neat):  $\nu = 3056, 3016, 2951, 1732, 1601, 1488, 1432, 1350, 1252, 1163, 1114, 1034, 830, 805, 781, 740, 700\text{ cm}^{-1}$ .  
HRMS (ESI,  $m/z$ ): calcd for  $\text{C}_{19}\text{H}_{23}\text{O}_2\text{Si}^+$   $[\text{M}+\text{H}]^+$  311.1467, found: 311.1461.

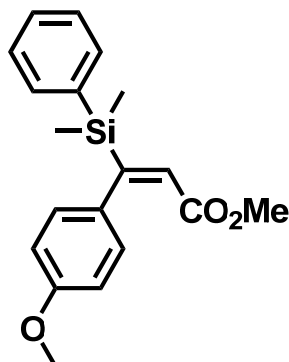

**5k** (E)-methyl 3-(dimethyl(phenyl)silyl)-3-(4-methoxyphenyl)acrylate

Light yellow oil.

Yield = 70%

$^1\text{H}$  NMR (400 MHz,  $\text{CDCl}_3$ )  $\delta$  (ppm): 7.50 – 7.46 (m, 2H), 7.42 – 7.33 (m, 3H), 6.82 – 6.75 (m, 4H), 6.22 (s, 1H), 3.79 (s, 3H), 3.53 (s, 3H), 0.38 (s, 6H).

$^{13}\text{C}$  NMR (100 MHz,  $\text{CDCl}_3$ )  $\delta$  (ppm): 166.7, 161.6, 158.1, 135.9, 134.2, 133.0, 129.5, 128.8, 127.9, 127.3, 113.3, 55.1, 51.1, -3.6.

FTIR (neat):  $\nu = 3064, 3000, 2951, 2836, 1724, 1610, 1504, 1456, 1432, 1350, 1253, 1172, 1106, 1033, 875, 822, 773, 700\text{ cm}^{-1}$ .

HRMS (ESI,  $m/z$ ): calcd for  $\text{C}_{19}\text{H}_{23}\text{O}_3\text{Si}^+$   $[\text{M}+\text{H}]^+$  327.1416, found: 327.1417.

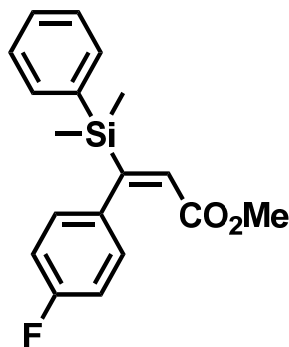

**5l** (E)-methyl 3-(dimethyl(phenyl)silyl)-3-(4-fluorophenyl)acrylate

Light yellow oil.

Yield = 77%

$^1\text{H}$  NMR (400 MHz,  $\text{CDCl}_3$ )  $\delta$  (ppm): 7.48 – 7.44 (m, 2H), 7.41 – 7.34 (m, 3H), 6.97 – 6.91 (m, 2H), 6.81 – 6.74 (m, 2H), 6.24 (s, 1H), 3.52 (s, 3H), 0.38 (s, 6H).

$^{13}\text{C}$  NMR (100 MHz,  $\text{CDCl}_3$ )  $\delta$  (ppm): 166.4, 161.5 (d,  $J = 243.2$  Hz), 161.2, 136.6 (d,  $J = 3.3$  Hz), 135.3, 134.2, 129.7, 129.2, 128.0, 127.5 (d,  $J = 7.8$  Hz), 114.8 (d,  $J = 21.3$  Hz), 51.2, -3.8.

$^{19}\text{F}$  NMR (376 MHz,  $\text{CDCl}_3$ )  $\delta$  (ppm): -116.8.

FTIR (neat):  $\nu = 3072, 3048, 2958, 1724, 1594, 1504, 1432, 1350, 1252, 1204, 1172, 1114, 1017, 985, 871, 830, 773, 733, 700\text{ cm}^{-1}$ .

HRMS (ESI,  $m/z$ ): calcd for  $\text{C}_{18}\text{H}_{20}\text{FO}_2\text{Si}^+$   $[\text{M}+\text{H}]^+$  315.1217, found: 315.1216.

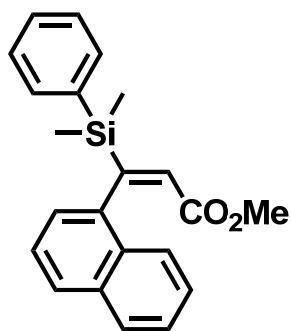

**5m** (E)-methyl 3-(dimethyl(phenyl)silyl)-3-(naphthalen-1-yl)acrylate

Light yellow oil.

**Yield** = 64%

$^1\text{H}$  NMR (400 MHz,  $\text{CDCl}_3$ )  $\delta$  (ppm): 7.81 (d,  $J$  = 8.1 Hz, 2H), 7.70 (d,  $J$  = 8.3 Hz, 2H), 7.61 (d,  $J$  = 8.4 Hz, 2H), 7.51 – 7.47 (m, 2H), 7.44 – 7.29 (m, 6H), 6.82 (dd,  $J_1$  = 7.1 Hz,  $J_2$  = 1.0 Hz, 1H), 6.47 (s, 1H), 3.34 (s, 3H), 0.34 (s, 3H), 0.30 (s, 3H).

$^{13}\text{C}$  NMR (100 MHz,  $\text{CDCl}_3$ )  $\delta$  (ppm): 164.9, 161.7, 138.9, 135.6, 134.2, 133.3, 130.7, 130.1, 129.6, 128.2, 127.9, 126.3, 125.5, 125.4, 125.3, 125.0, 122.1, 51.1, -3.3, -3.9.

FTIR (neat):  $\nu$  = 3048, 2951, 1732, 1594, 1504, 1432, 1390, 1350, 1252, 1172, 1114, 830, 781, 733, 700  $\text{cm}^{-1}$ .

HRMS (ESI,  $m/z$ ): calcd for  $\text{C}_{22}\text{H}_{23}\text{O}_2\text{Si}^+$   $[\text{M}+\text{H}]^+$  347.1467, found: 347.1459.

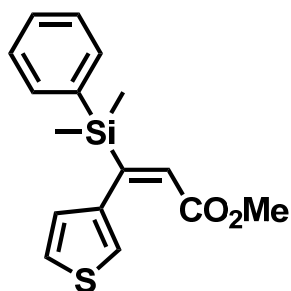

**5n** (E)-methyl 3-(dimethyl(phenyl)silyl)-3-(thiophen-3-yl)acrylate

Light yellow oil.

**Yield** = 87%

$^1\text{H}$  NMR (400 MHz,  $\text{CDCl}_3$ )  $\delta$  (ppm): 7.51 – 7.46 (m, 2H), 7.41 – 7.33 (m, 3H), 7.24 – 7.20 (m, 1H), 6.76 – 6.66 (m, 2H), 6.24 (s, 1H), 3.57 (s, 3H), 0.39 (s, 6H).

$^{13}\text{C}$  NMR (100 MHz,  $\text{CDCl}_3$ )  $\delta$  (ppm): 166.8, 156.0, 140.0, 135.8, 134.2, 129.6, 129.4, 128.0, 127.4, 124.5, 119.9, 51.3, -3.6.

FTIR (neat):  $\nu$  = 3072, 3007, 2951, 1732, 1585, 1432, 1325, 1252, 1172, 1114, 1034, 830, 781, 740, 700  $\text{cm}^{-1}$ .

HRMS (ESI,  $m/z$ ): calcd for  $\text{C}_{16}\text{H}_{19}\text{O}_2\text{SSi}^+$   $[\text{M}+\text{H}]^+$  303.0875, found: 303.0880.

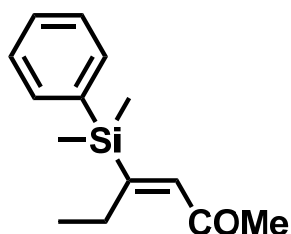

**5o** (E)-4-(dimethyl(phenyl)silyl)hex-3-en-2-one

Light yellow oil.

**Yield** = 85%

$^1\text{H}$  NMR (400 MHz,  $\text{CDCl}_3$ )  $\delta$  (ppm): 7.55 – 7.50 (m, 2H), 7.33 – 7.28 (m, 3H), 6.74 (t,  $J$  = 1.6 Hz, 1H), 2.28 (qd,  $J_1$  = 7.3 Hz,  $J_2$  = 1.6 Hz, 2H), 2.14 (s, 3H), 1.01 (t,  $J$  = 7.3 Hz, 3H), 0.44 (s, 6H).

$^{13}\text{C}$  NMR (100 MHz,  $\text{CDCl}_3$ )  $\delta$  (ppm): 197.7, 165.4, 139.3, 137.0, 133.8, 128.4, 127.4, 31.9, 30.2, 13.7, -2.0.

FTIR (neat):  $\nu$  = 3072, 3007, 2951, 1691, 1570, 1488, 1423, 1358, 1245, 1172, 1106, 847, 814, 781, 700  $\text{cm}^{-1}$ .

HRMS (ESI,  $m/z$ ): calcd for  $\text{C}_{14}\text{H}_{21}\text{OSi}^+$   $[\text{M}+\text{H}]^+$  233.1362, found: 233.1358.

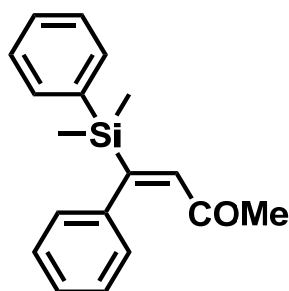

**5p** (E)-4-(dimethyl(phenyl)silyl)-4-phenylbut-3-en-2-one

Light yellow oil.

**Yield** = 57%

$^1\text{H}$  NMR (400 MHz,  $\text{CDCl}_3$ )  $\delta$  (ppm): 7.61 – 7.54 (m, 2H), 7.34 – 7.29 (m, 4H), 7.29 – 7.22 (m, 2H), 7.13 – 7.06 (m, 2H), 6.82 (s, 1H), 2.19 (s, 3H), 0.38 (s, 6H).

$^{13}\text{C}$  NMR (100 MHz,  $\text{CDCl}_3$ )  $\delta$  (ppm): 197.9, 162.5, 145.2, 140.7, 138.6, 133.8, 128.5, 127.9, 127.4, 126.7, 126.6, 30.4, -0.9.

FTIR (neat):  $\nu$  = 3072, 2958, 2934, 1691, 1577, 1422, 1358, 1244, 1196, 1106, 968, 822, 772, 732, 700  $\text{cm}^{-1}$ .

HRMS (ESI, m/z): calcd for  $\text{C}_{18}\text{H}_{21}\text{OSi}^+$   $[\text{M}+\text{H}]^+$  281.1362, found: 281.1367.

#### 4. References

- (1) T. Nishimura, S. Hirabayashi, T. Hayashi, *J. Am. Chem. Soc.* **2006**, *128*, 2556 – 2557.
- (2) M. Harmata, C. F. Huang, *Adr. Synth. Catal.* **2008**, *350*, 972 – 974.
- (3) S. Y. Chow, H. J. Williams, Q. Huang, S. Nanda, A. I. Scott, *J. Org. Chem.* **2005**, *70*, 9997 – 10003.
- (4) T. M. Werkhoven, R. V. Nispen, J. Lugtenburg, *Eur. J. Org. Chem.* **1999**, *11*, 2909 – 2914.
- (5) E. K. Gary, L. G. Robert, *J. Org. Chem.* **2008**, *73*, 9675 – 9691.
- (6) L. G. Beholz, P. Benovsky, D. L. Ward, N. S. Barta, J. R. Stille, *J. Org. Chem.* **1997**, *62*, 1033 – 1042.
- (7) D. Patrick, L. I. Quen, *J. Org. Chem.* **1992**, *57*, 1952 – 1954.
- (8) R. J. Cox, D. J. Ritson, T. A. Dane, J. Berg, J. Charmant, A. Kantacha, *Chem. Comm.* **2005**, *8*, 1037 – 1039.
- (9) Y. Wang, W. Zhang, S. Ma, *J. Am. Chem. Soc.* **2013**, *135*, 11517 – 11520.

## 5. $^1\text{H}$ , $^{13}\text{C}$ spectra

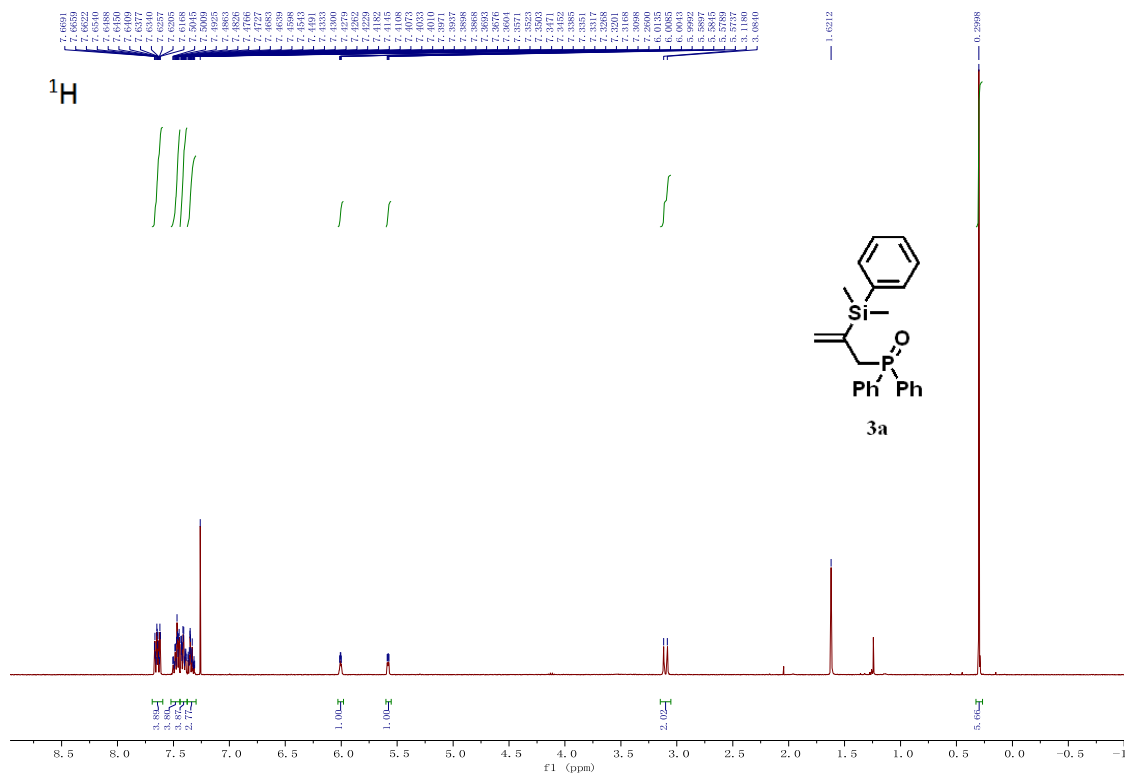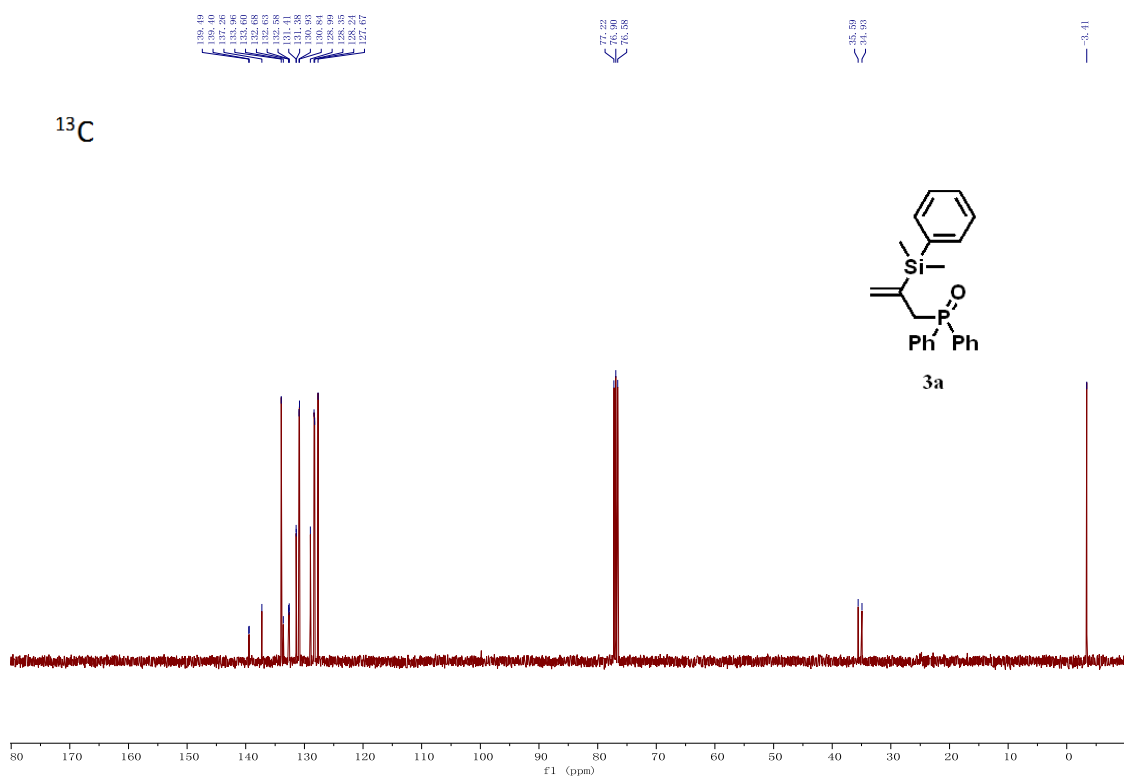

<sup>31</sup>P

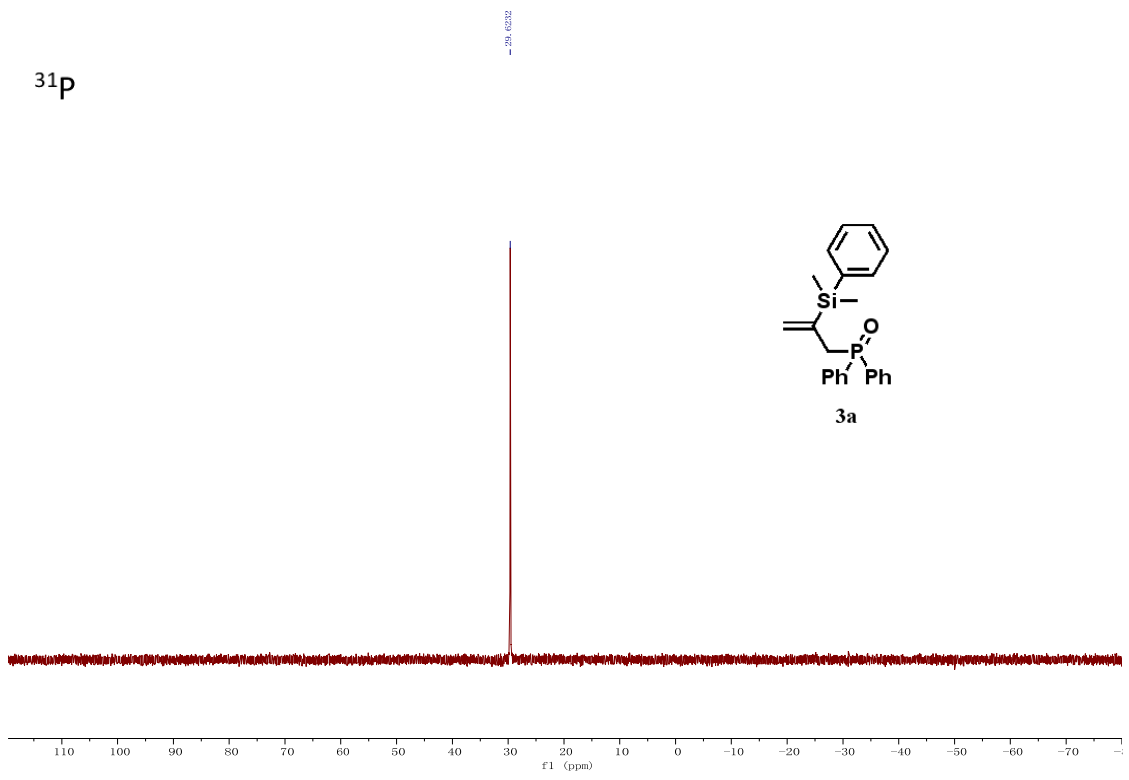

<sup>1</sup>H

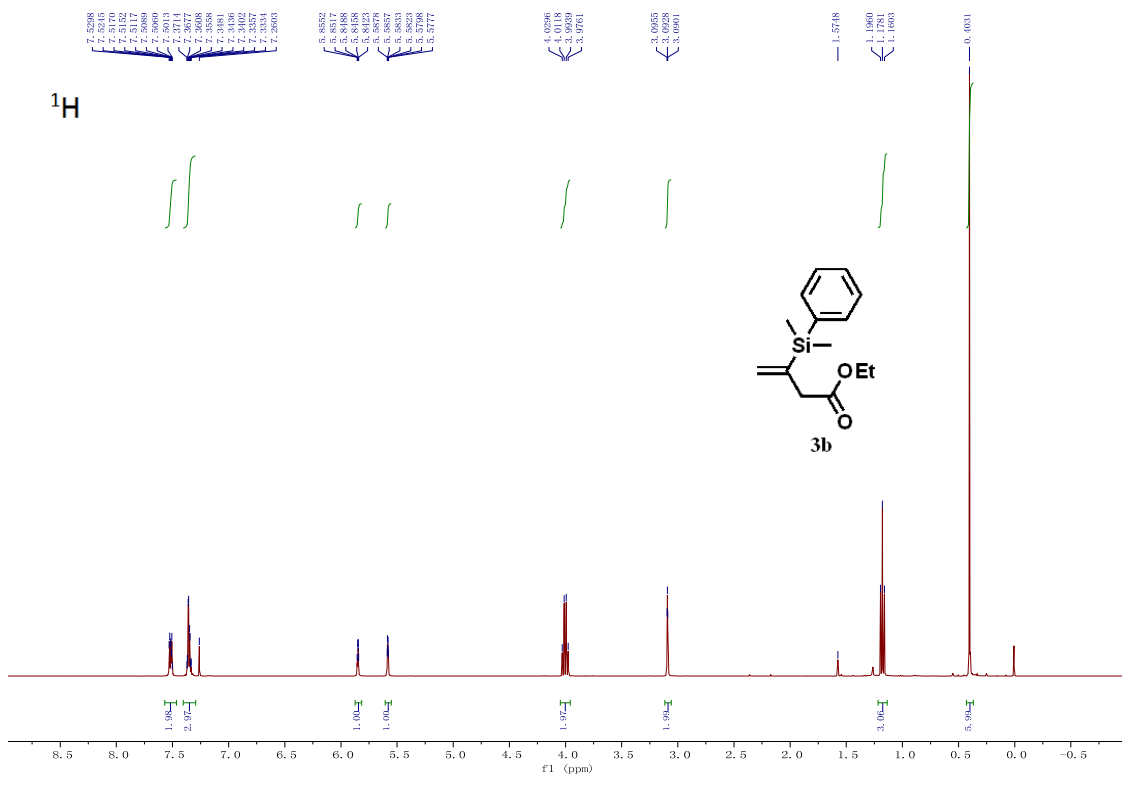

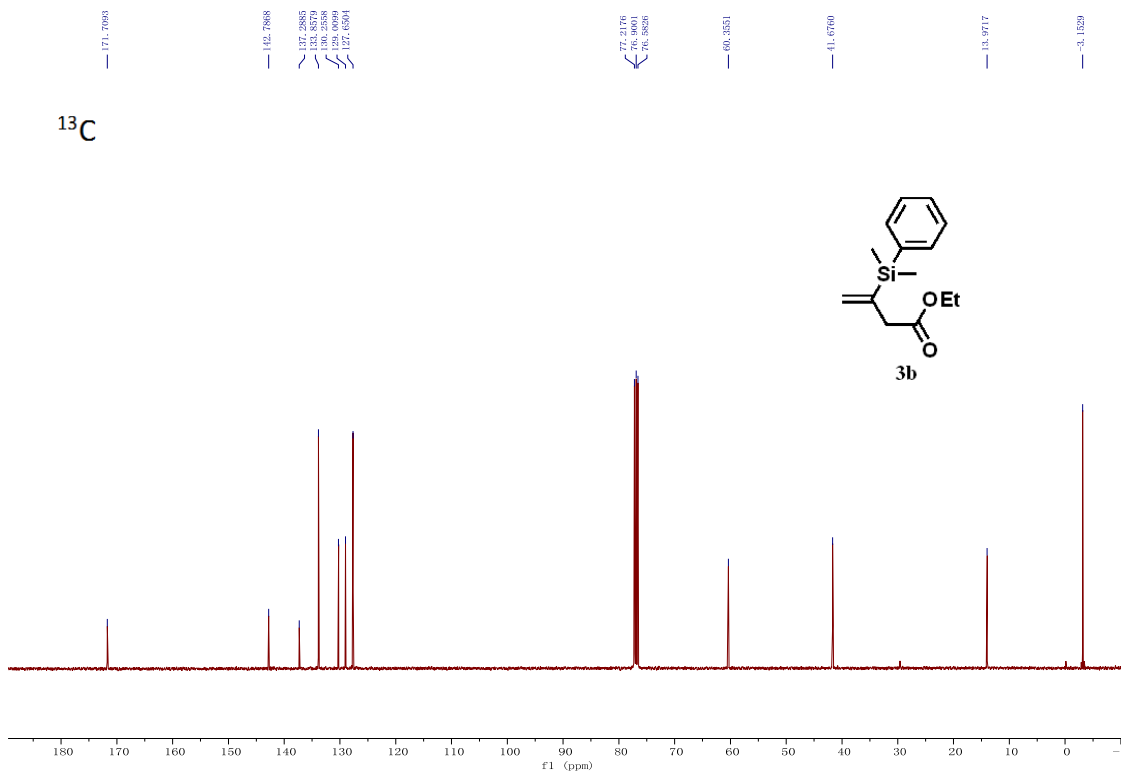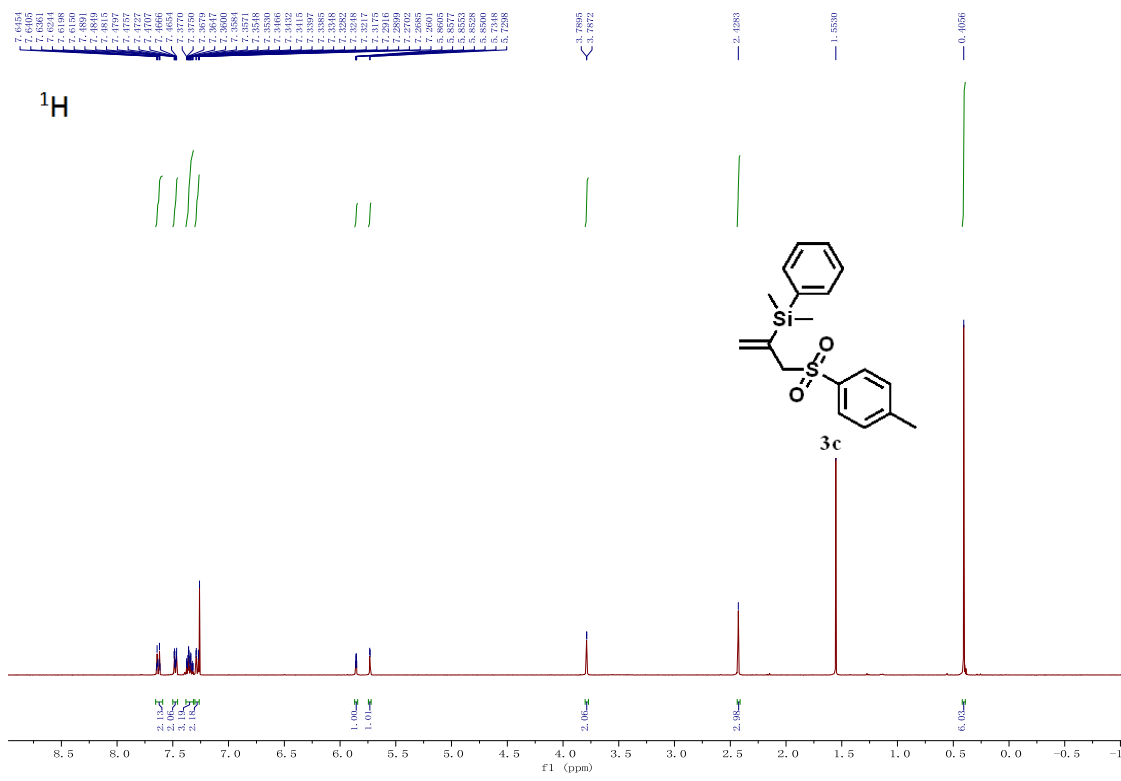

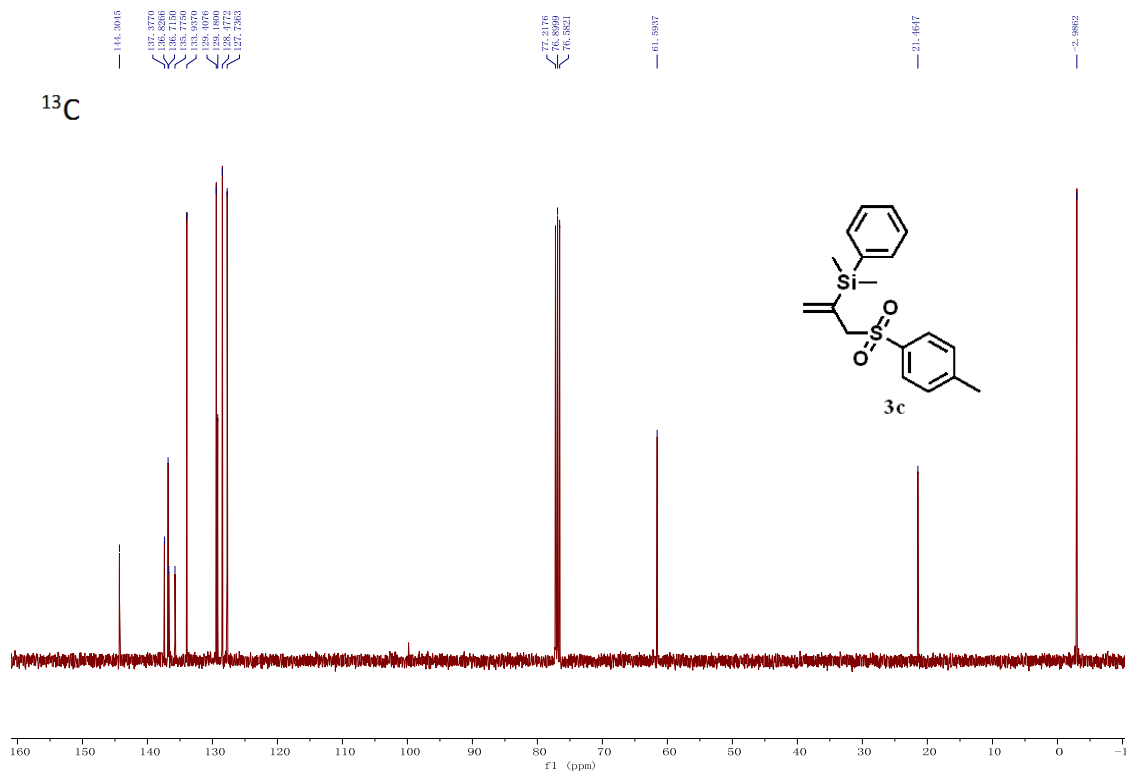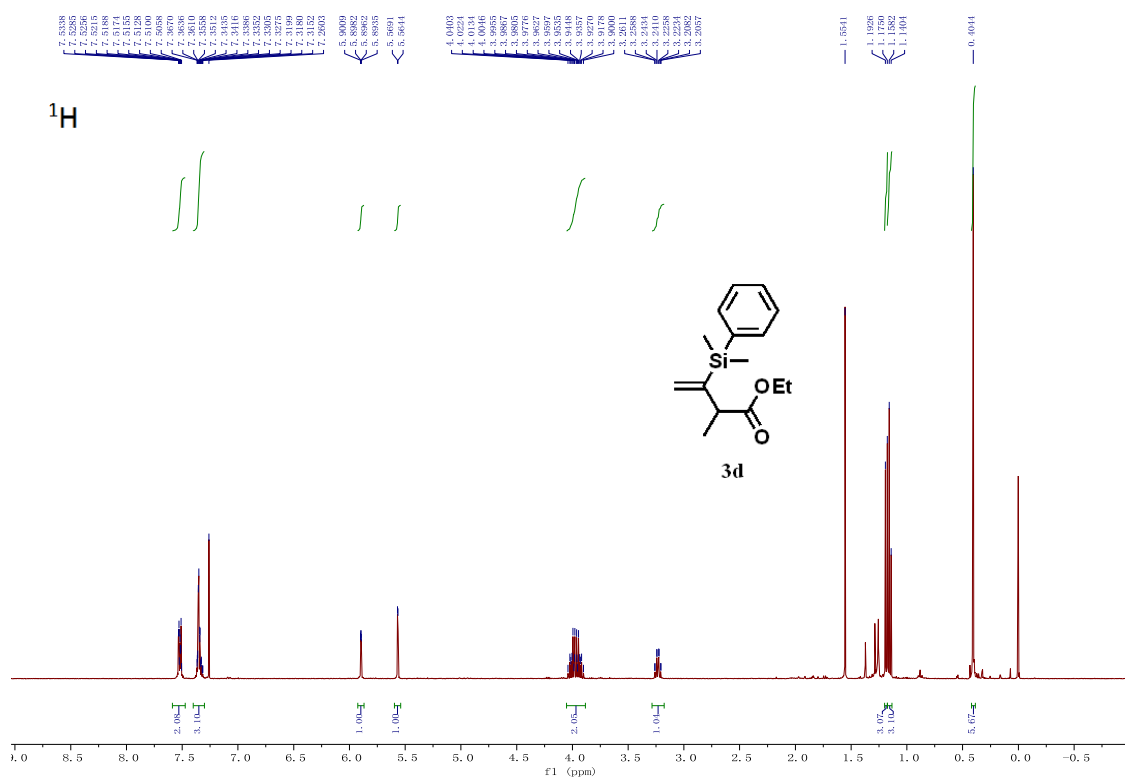

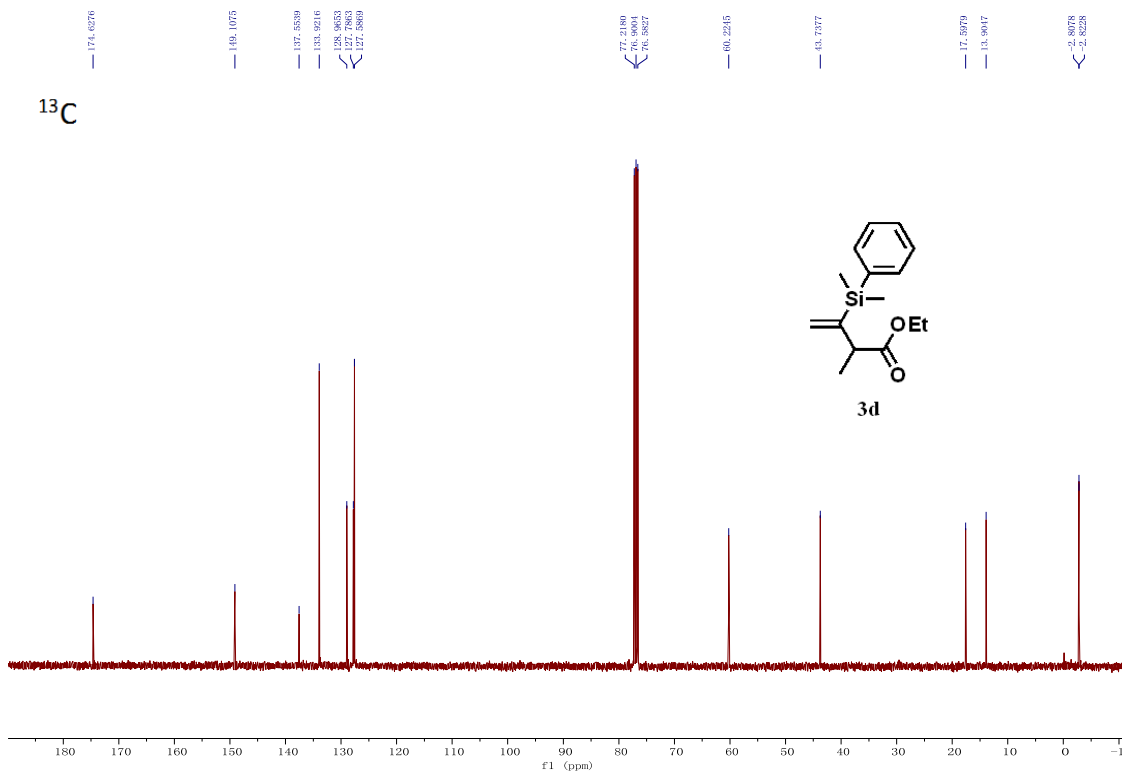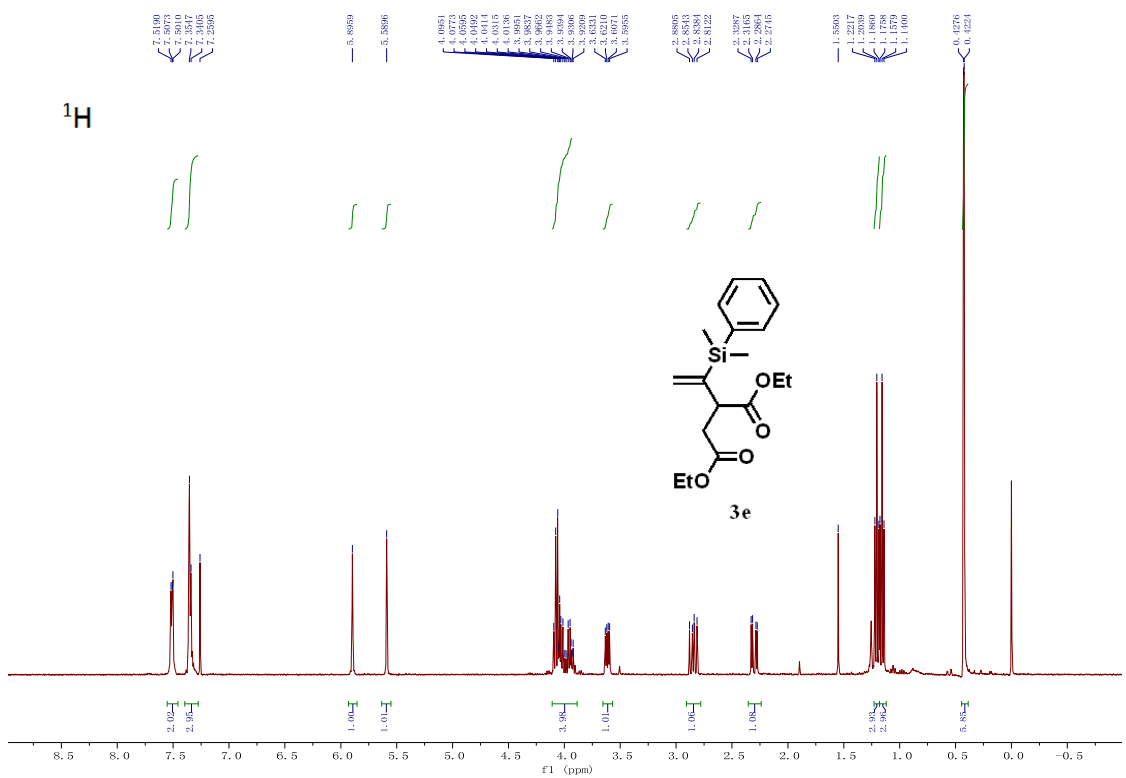



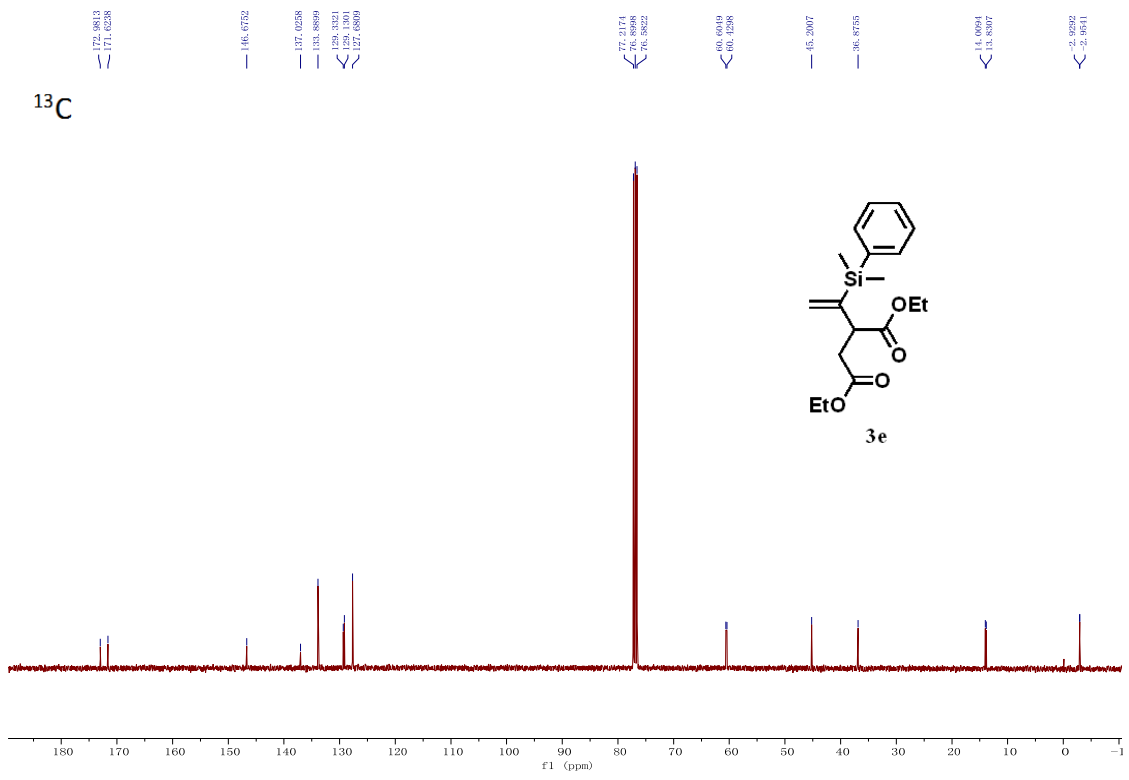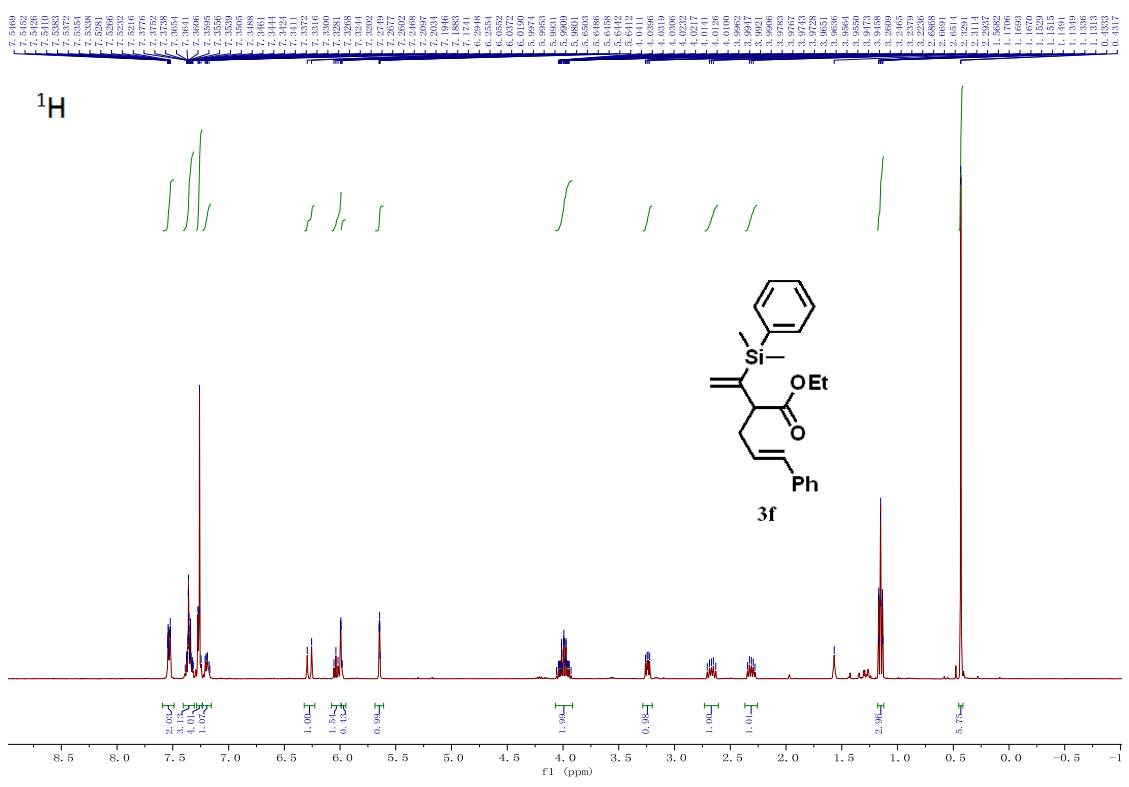

<sup>13</sup>C

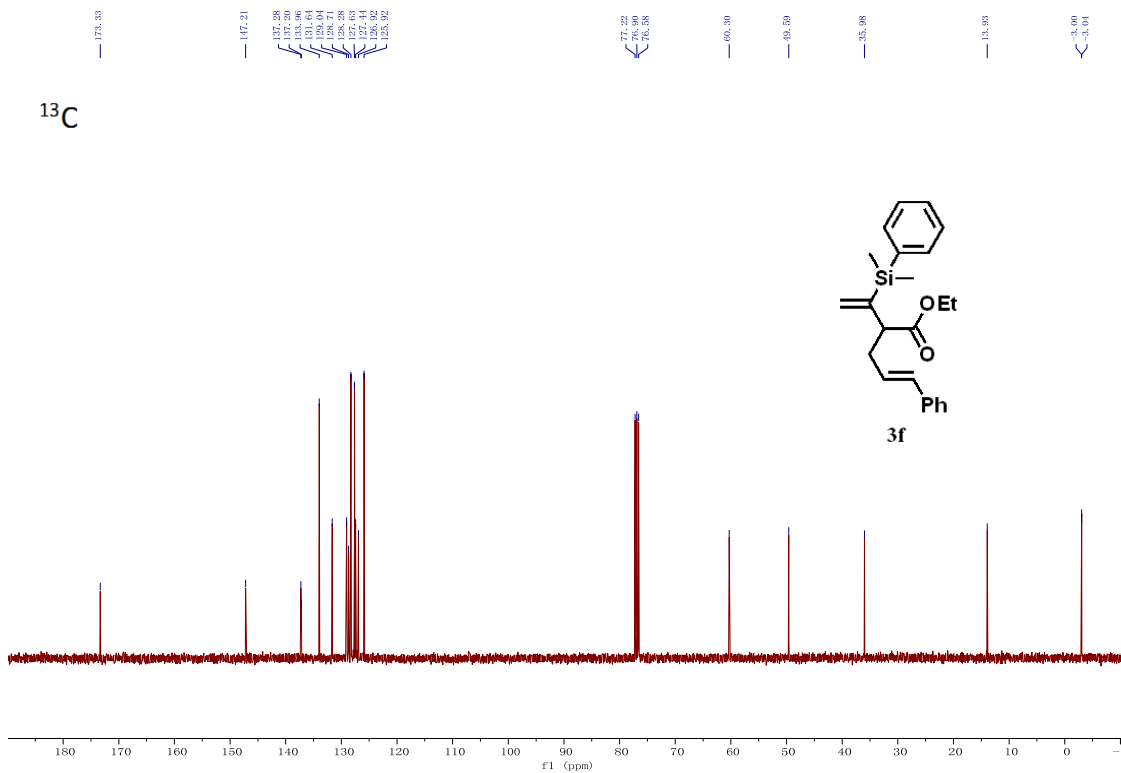

<sup>1</sup>H

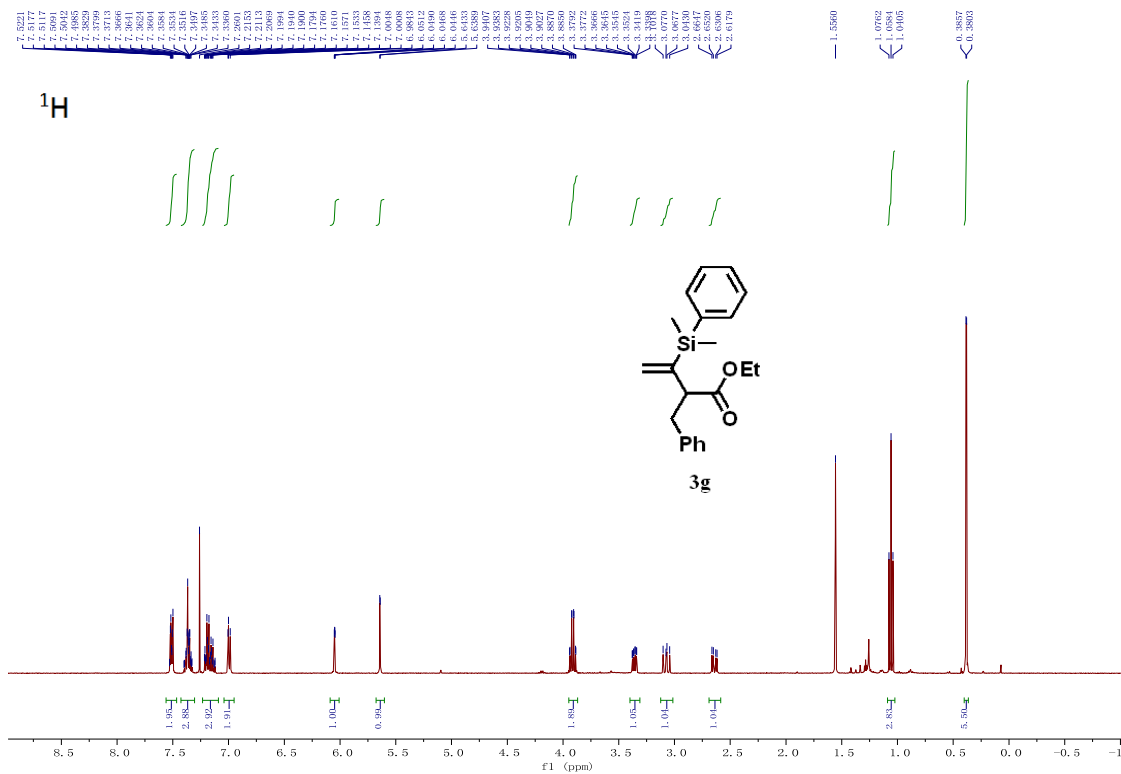

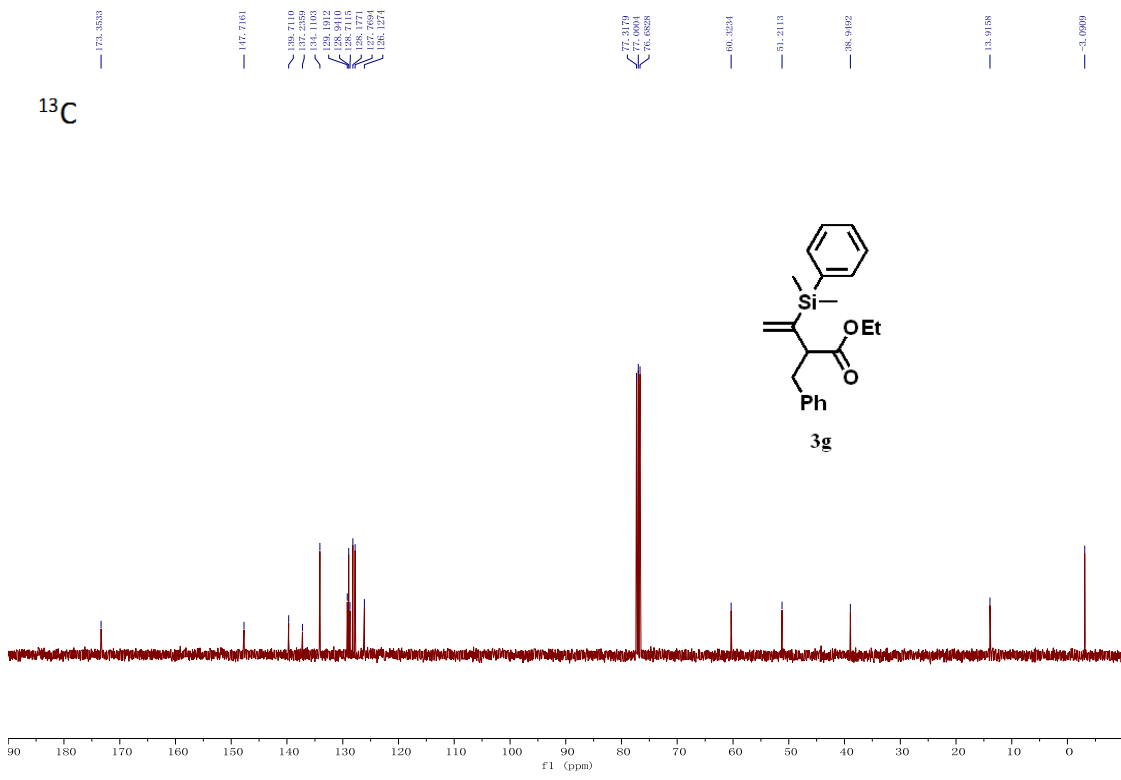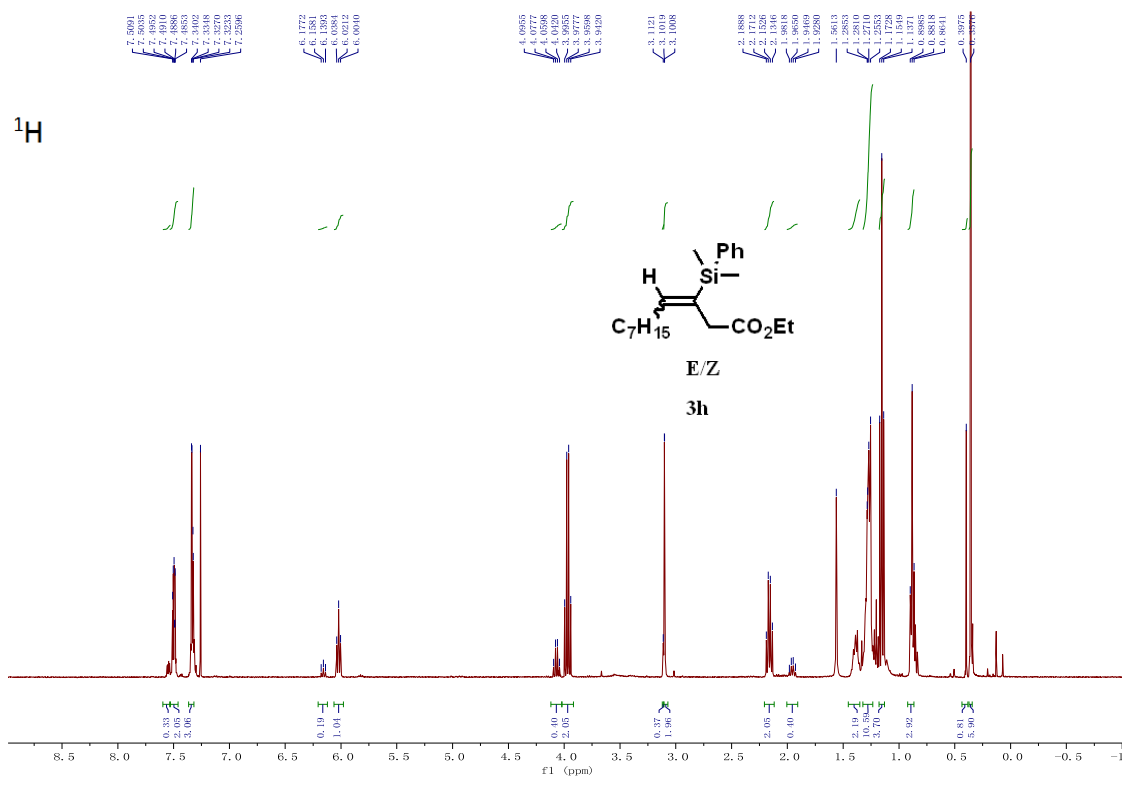

<sup>13</sup>C

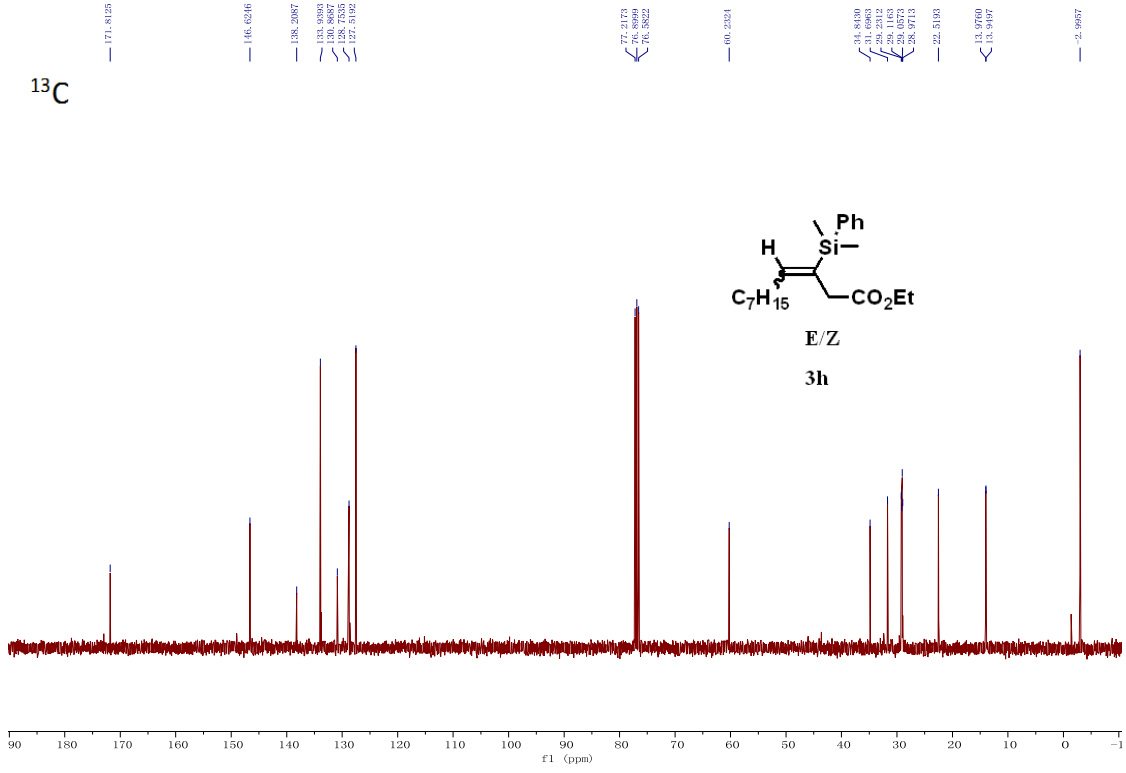

NOE-1D

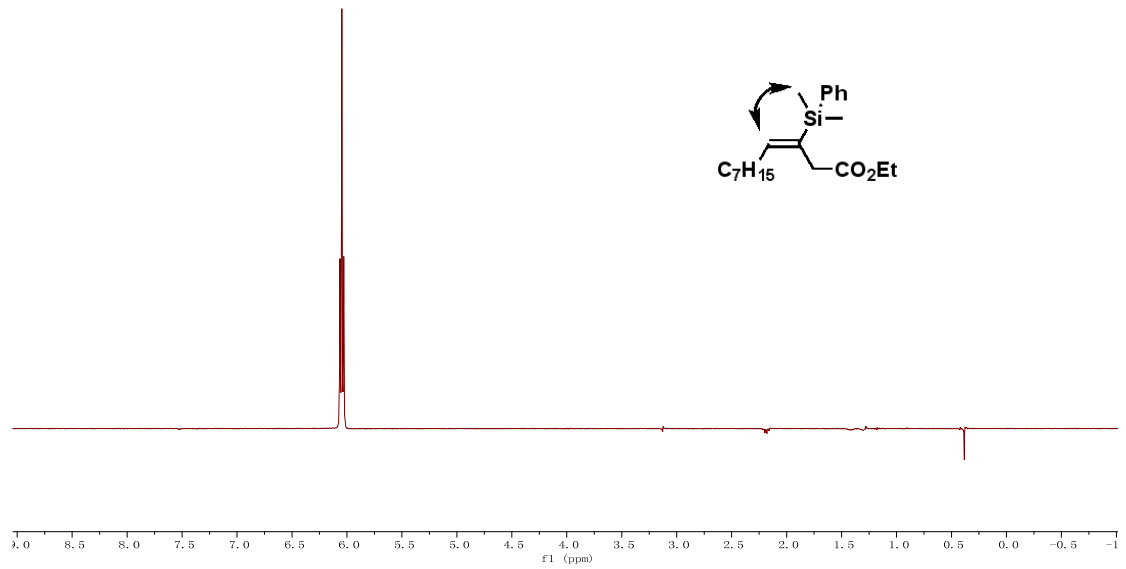

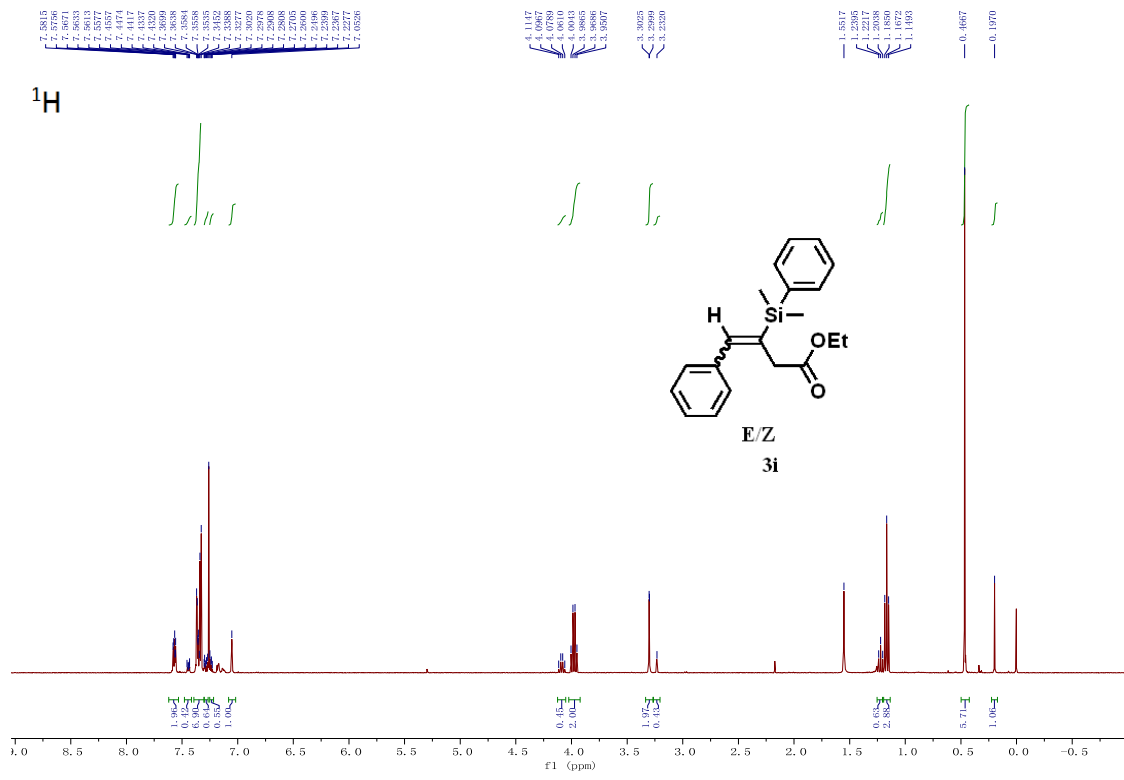

# NOE-1D

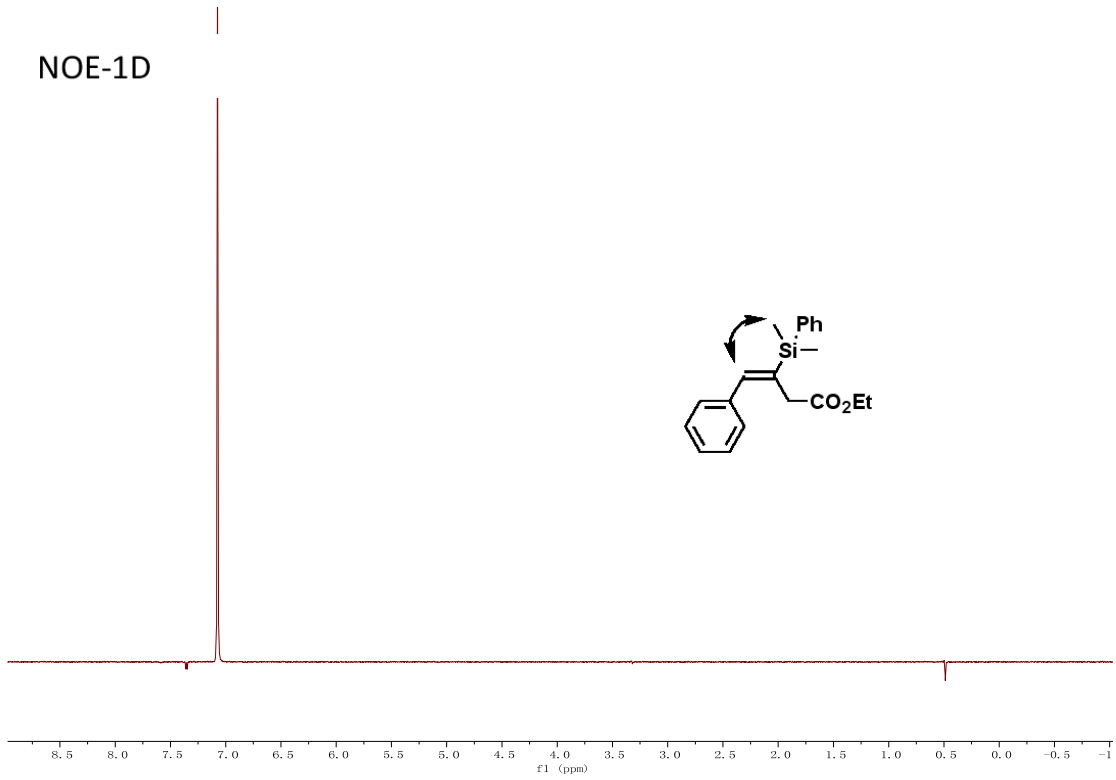

# NOESY - 2D

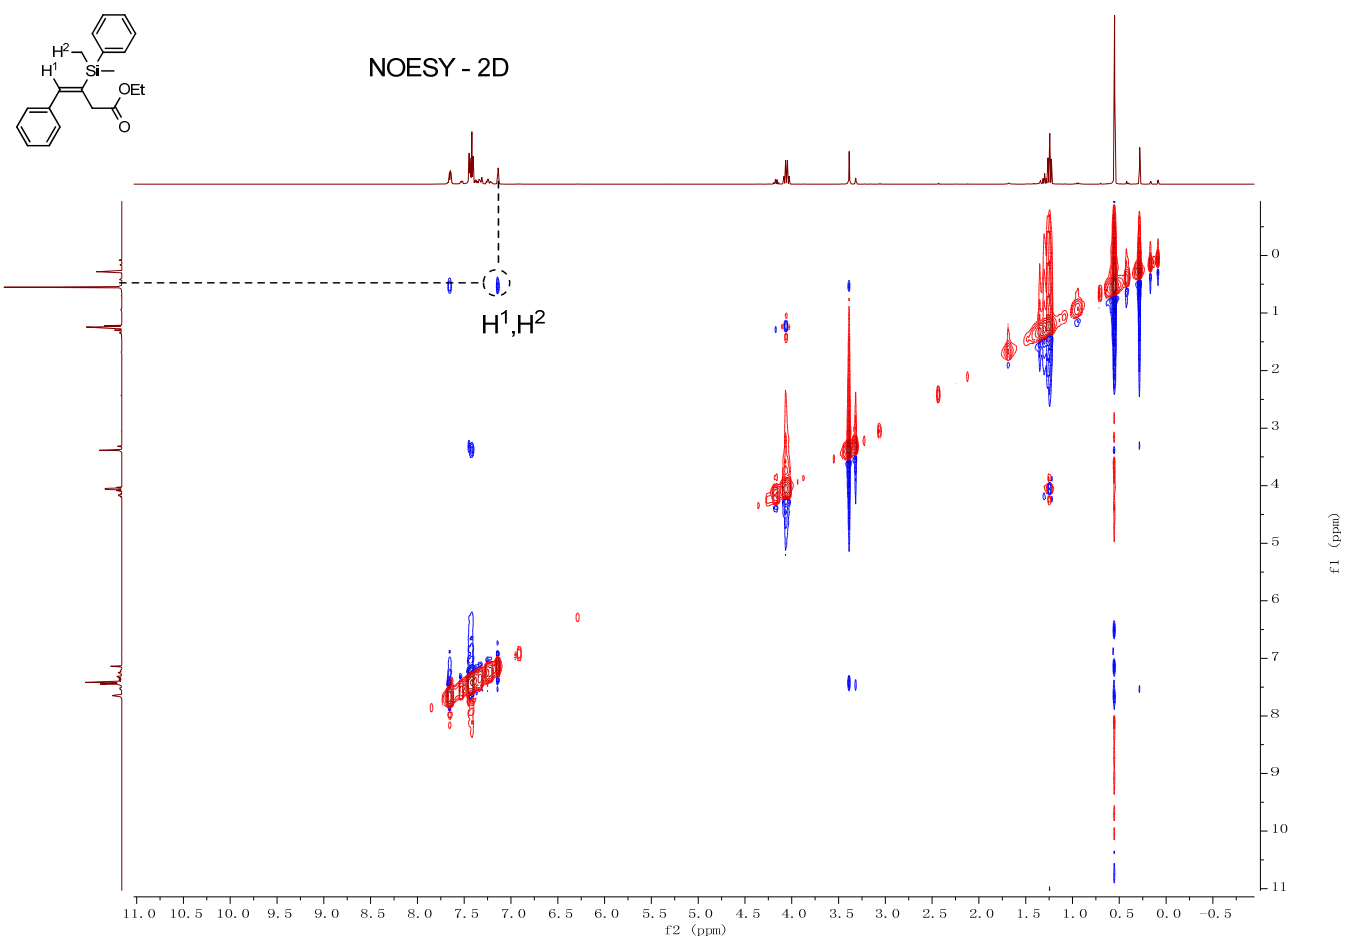



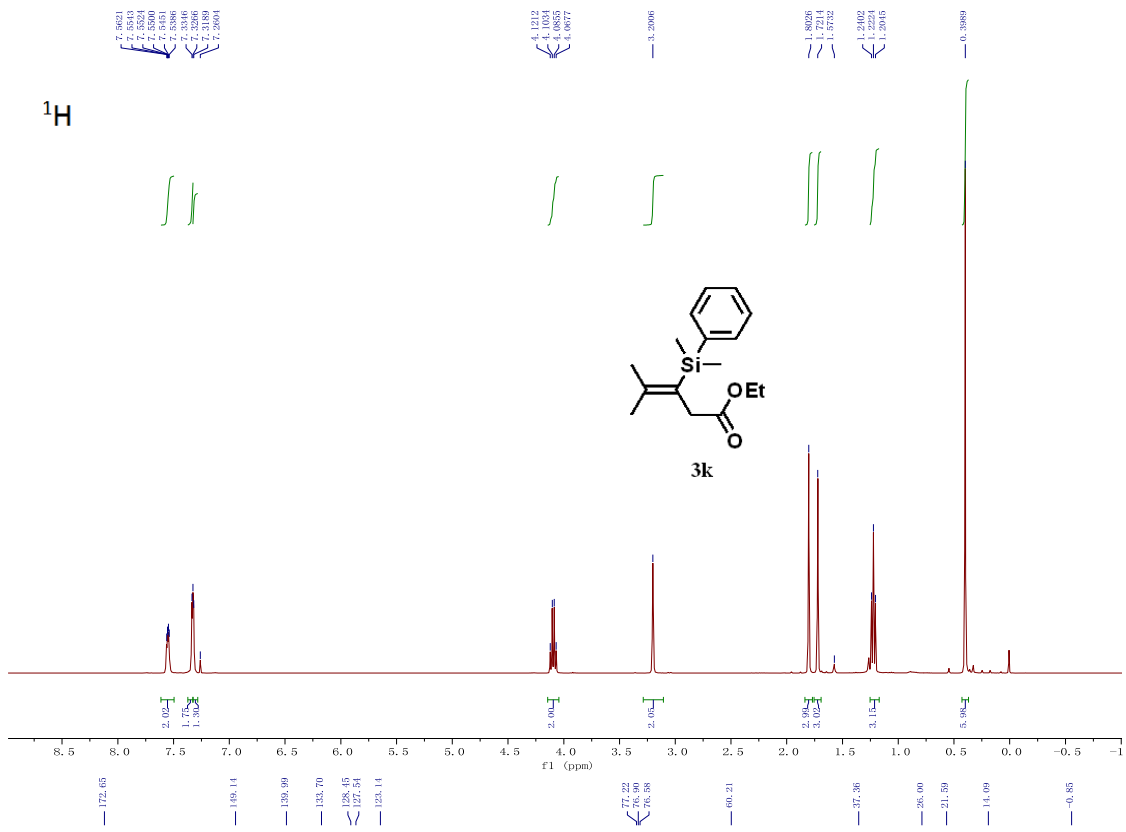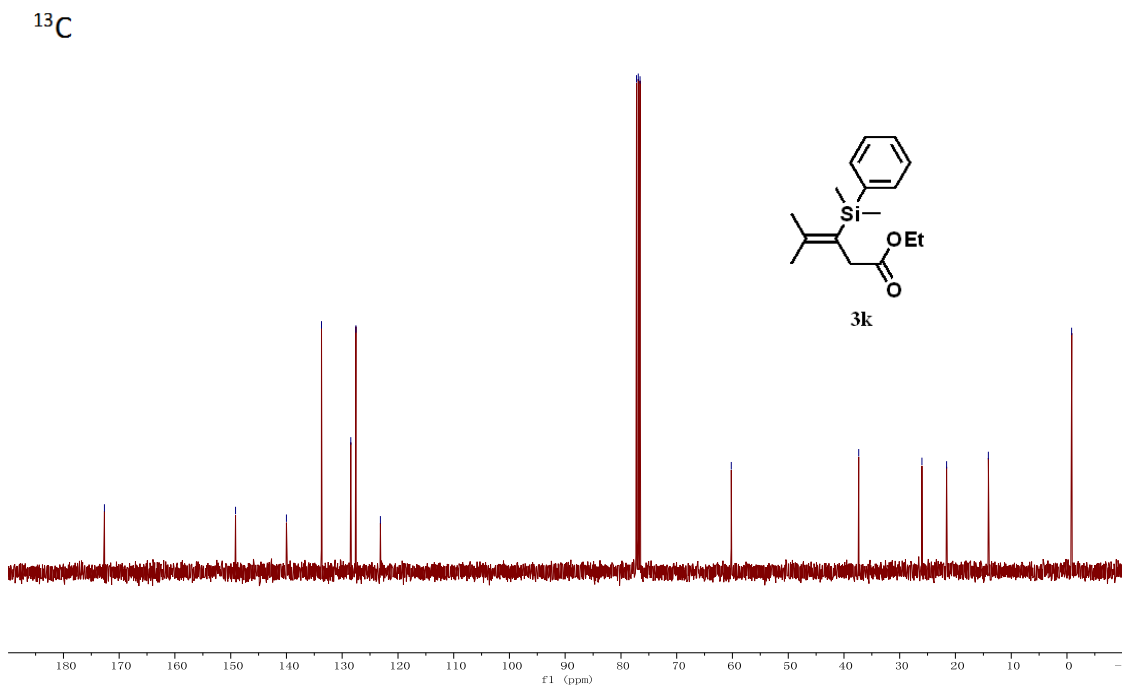



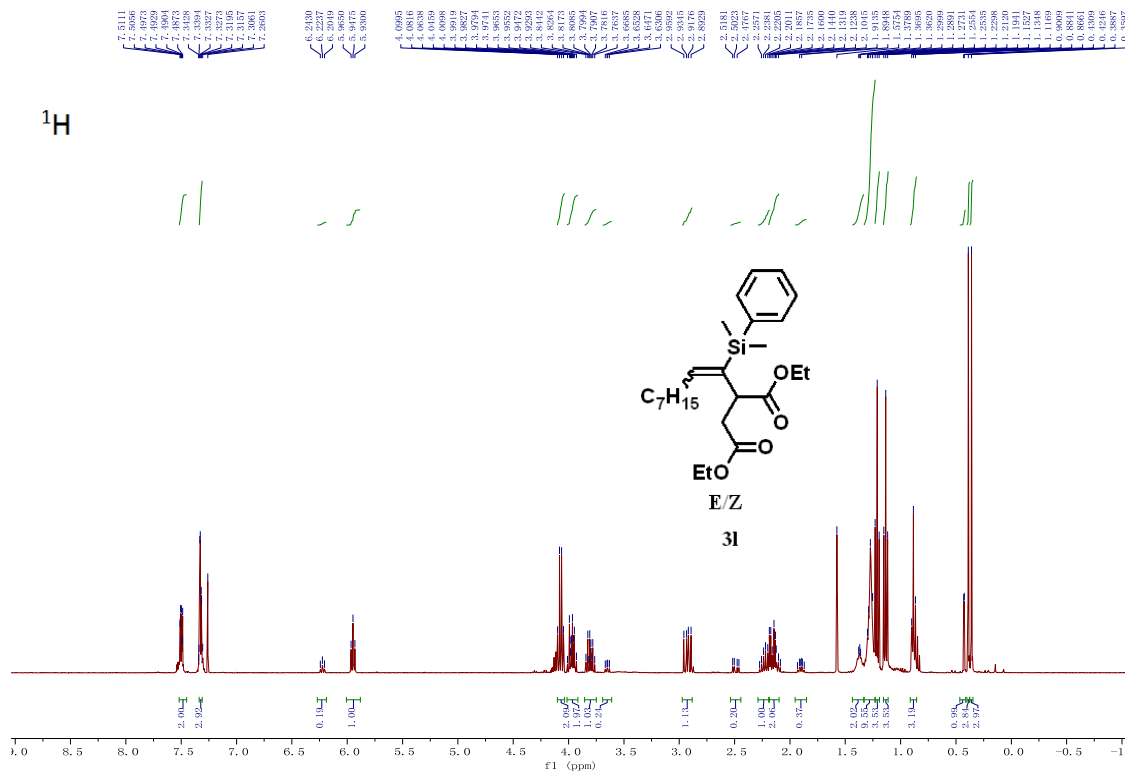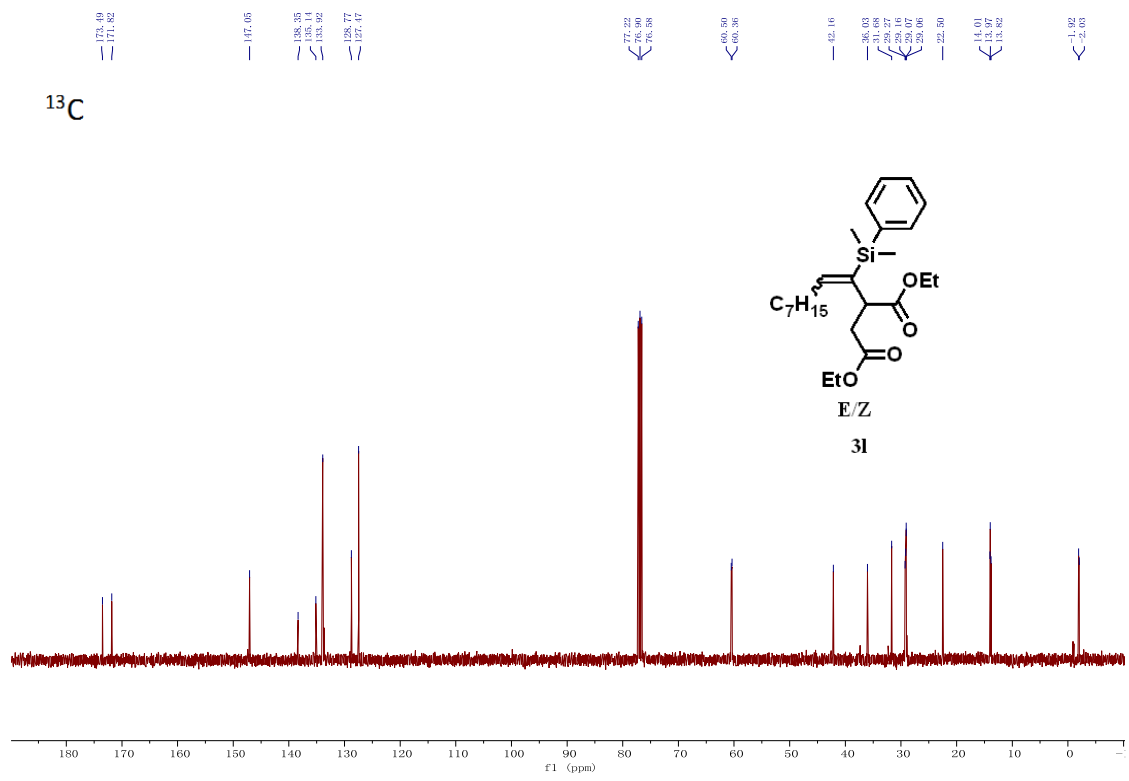

# NOE-1D

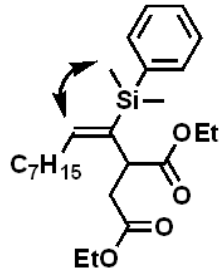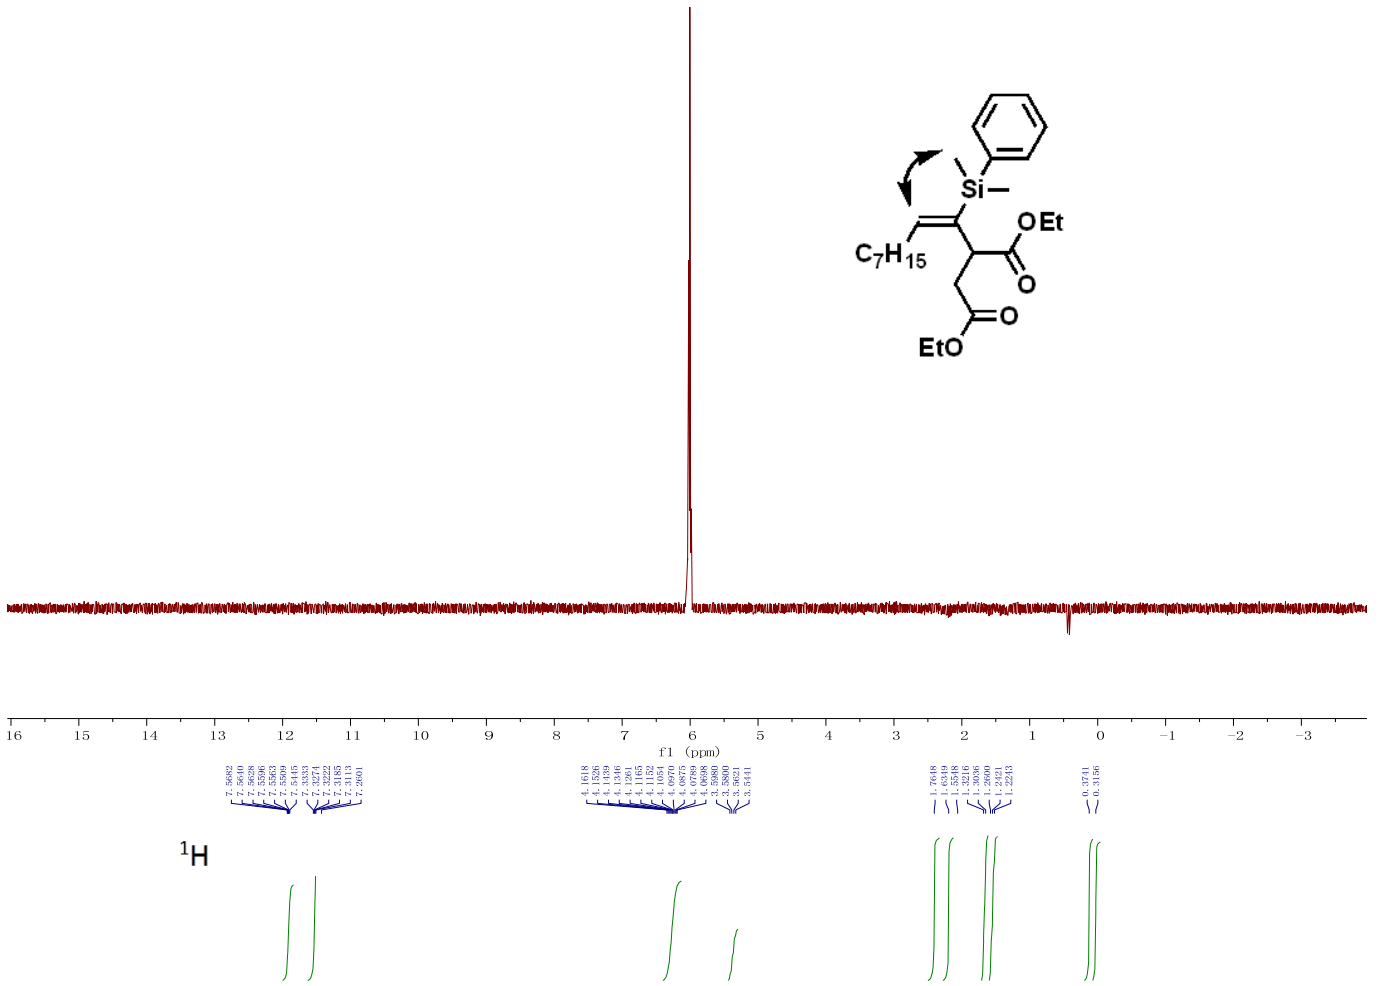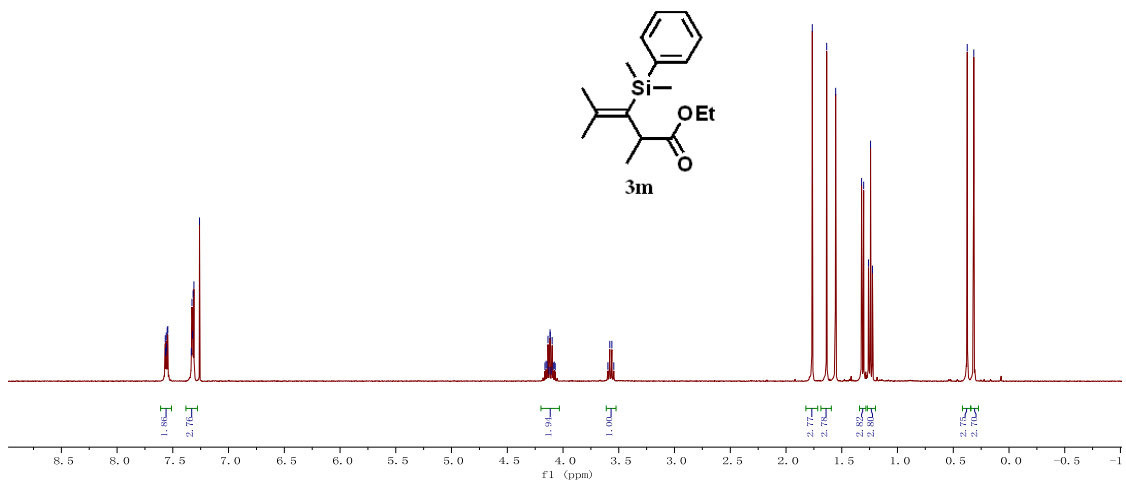

<sup>13</sup>C

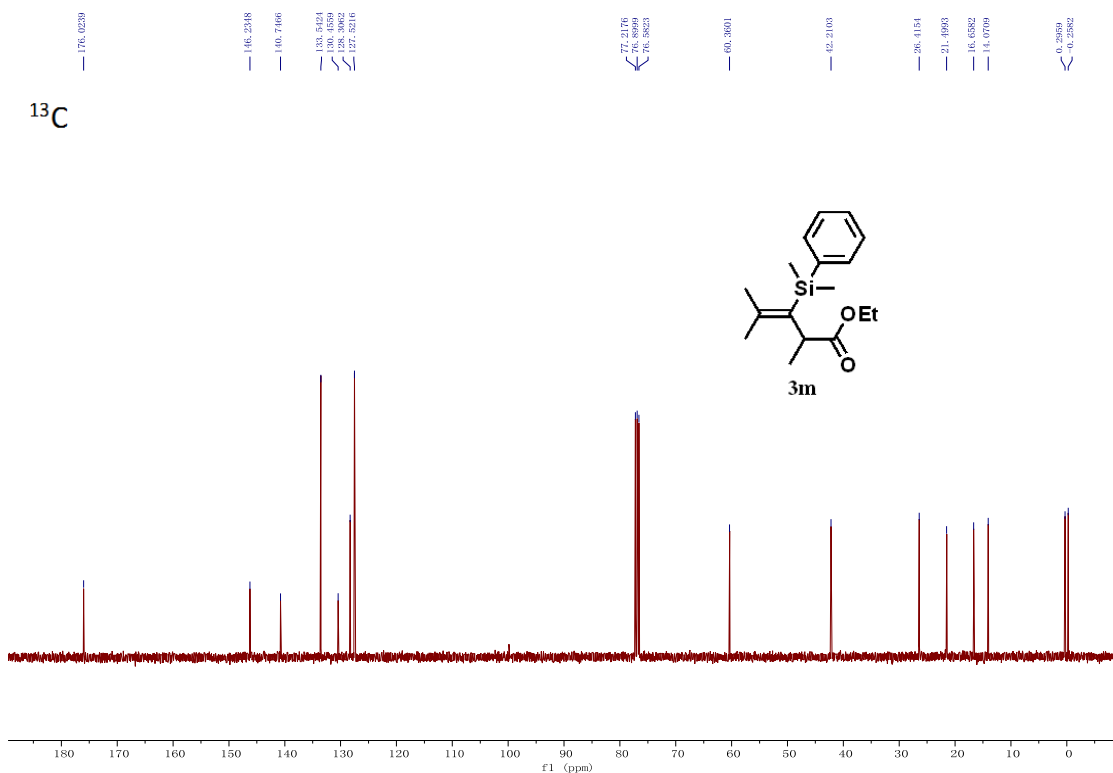

<sup>1</sup>H

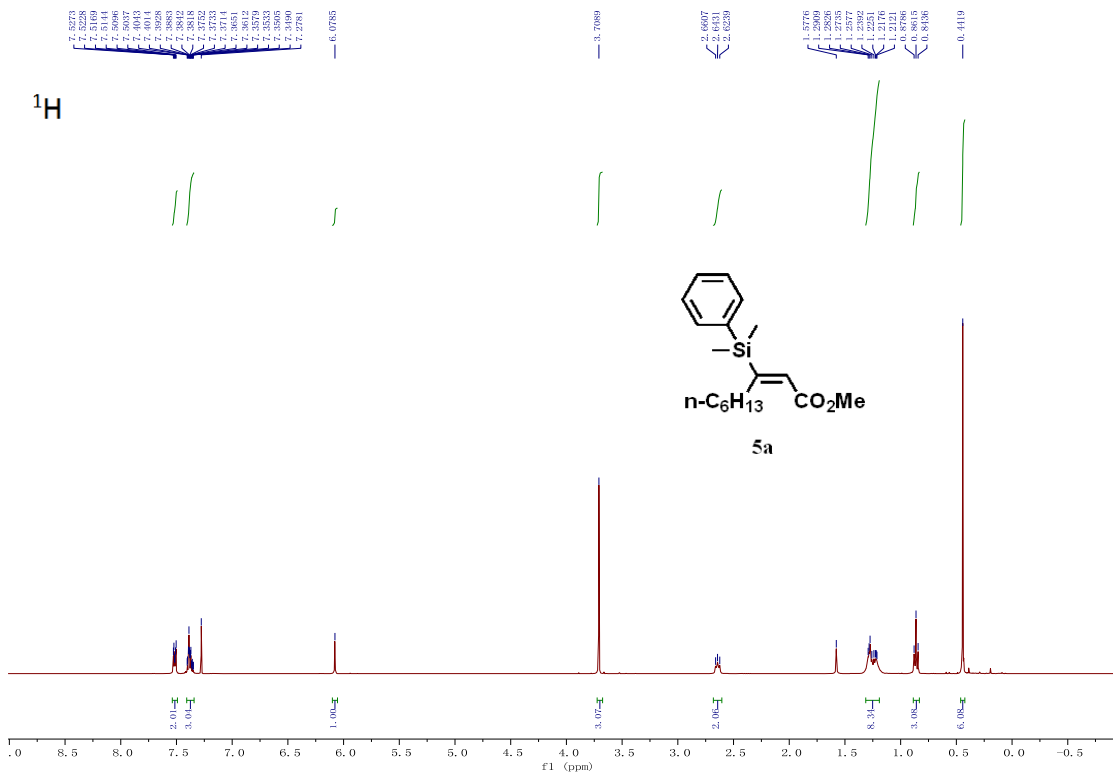

<sup>13</sup>C

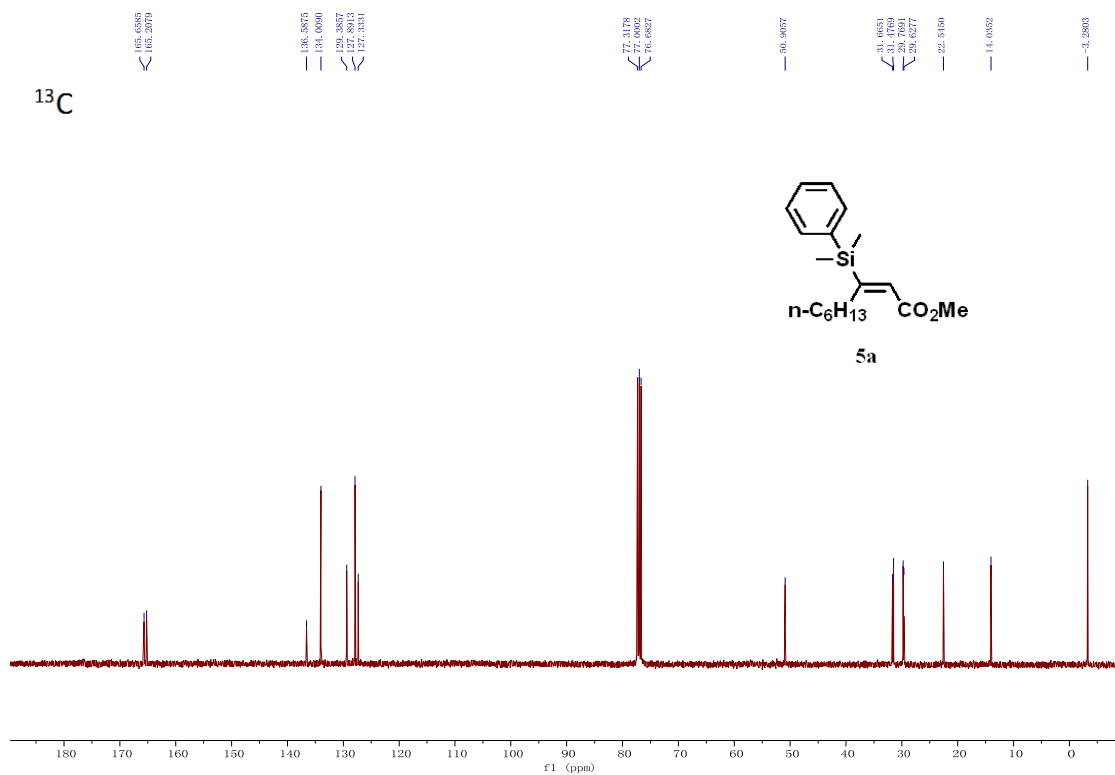

NOE-1D

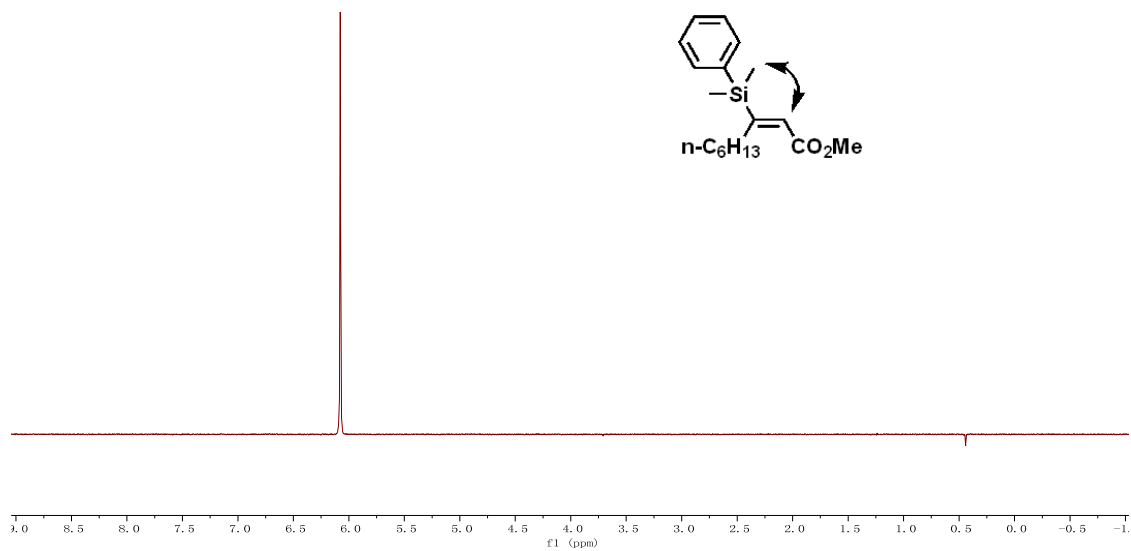

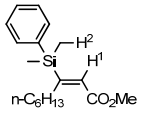

NOESY - 2D

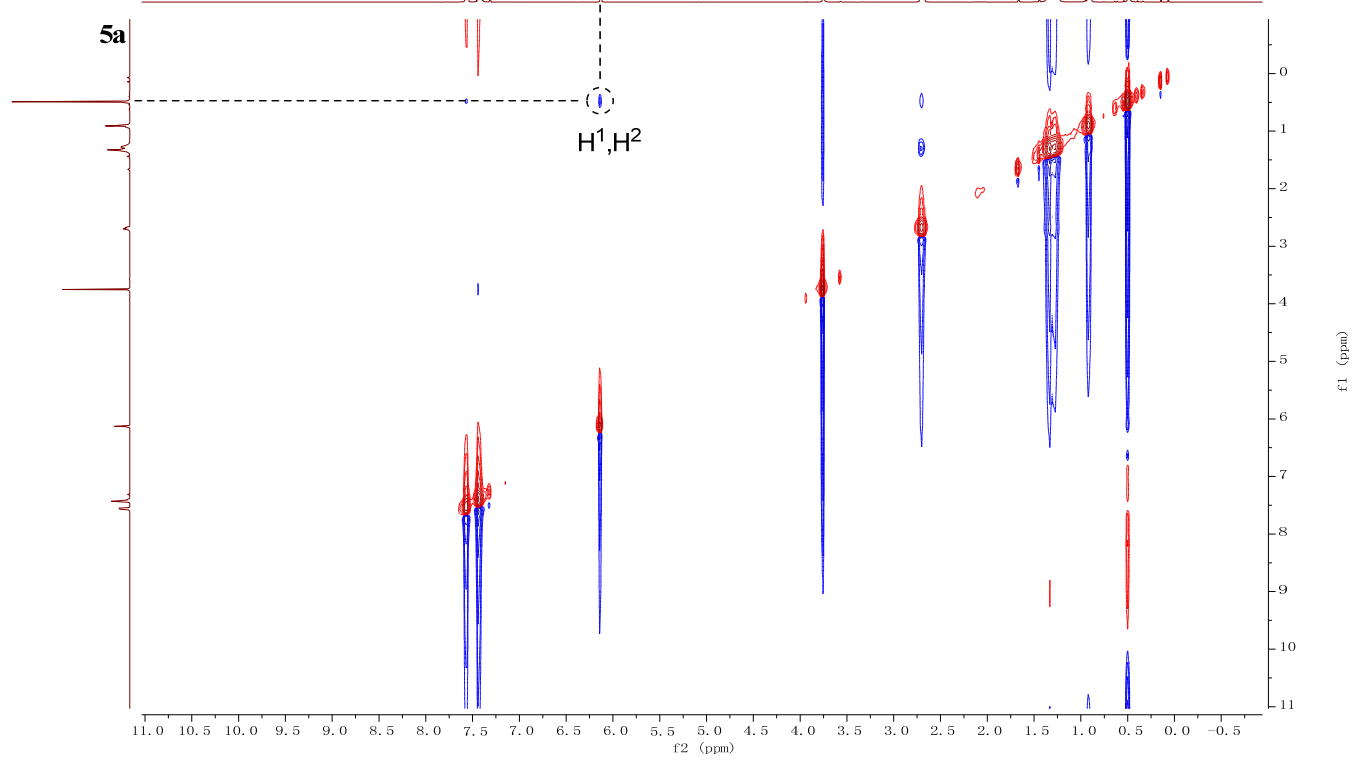

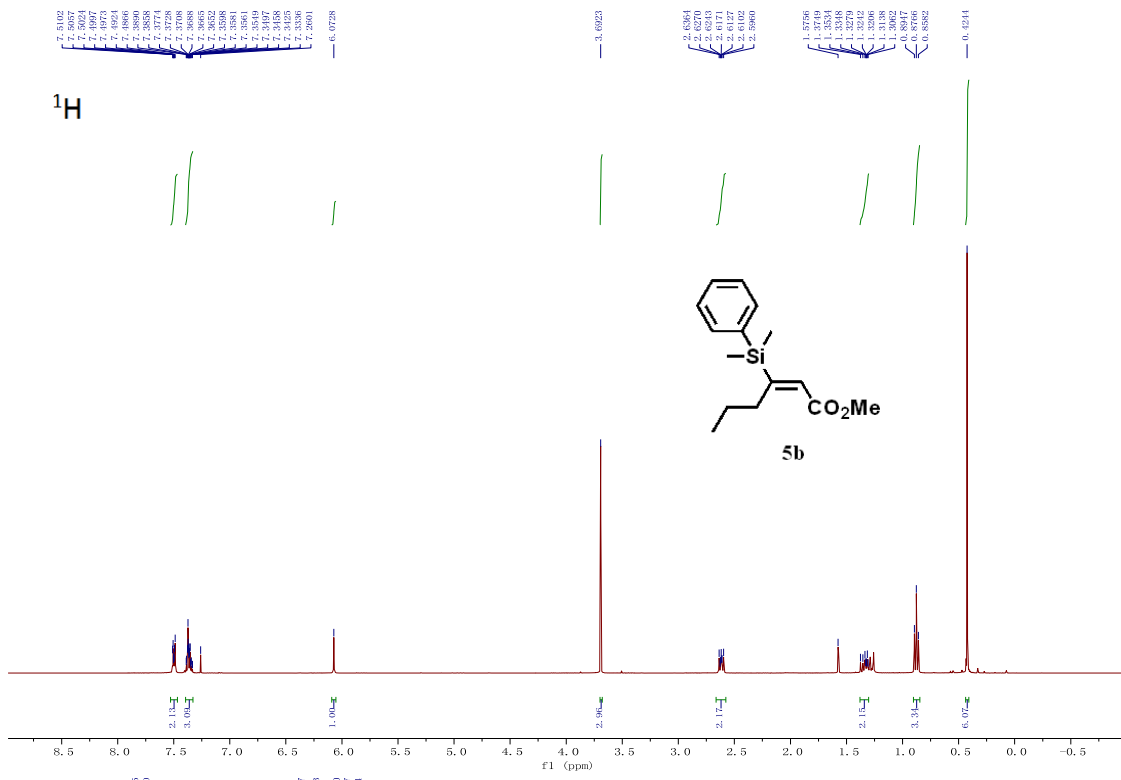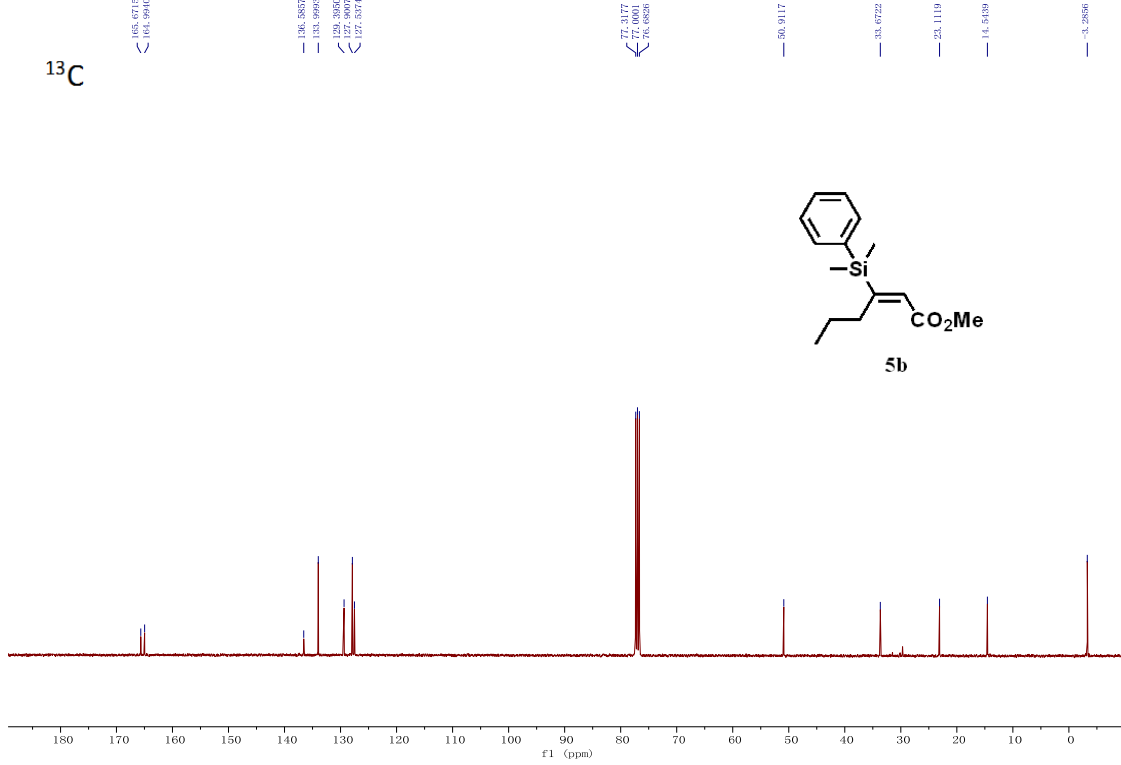

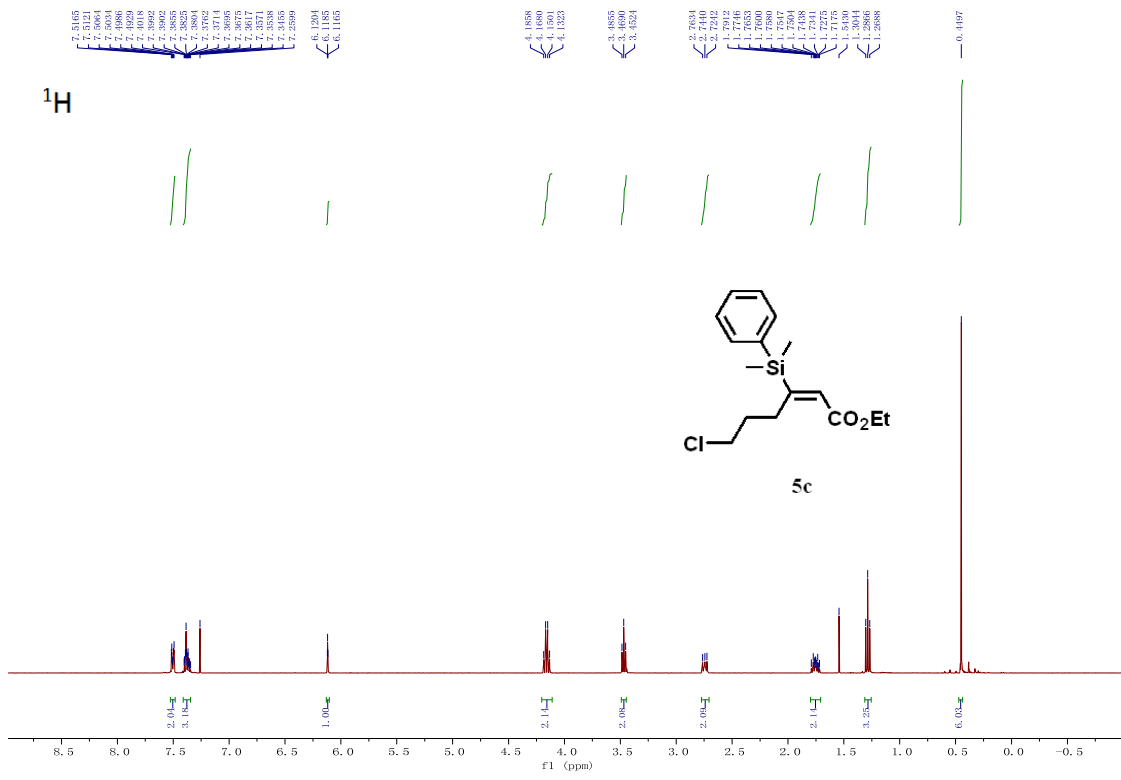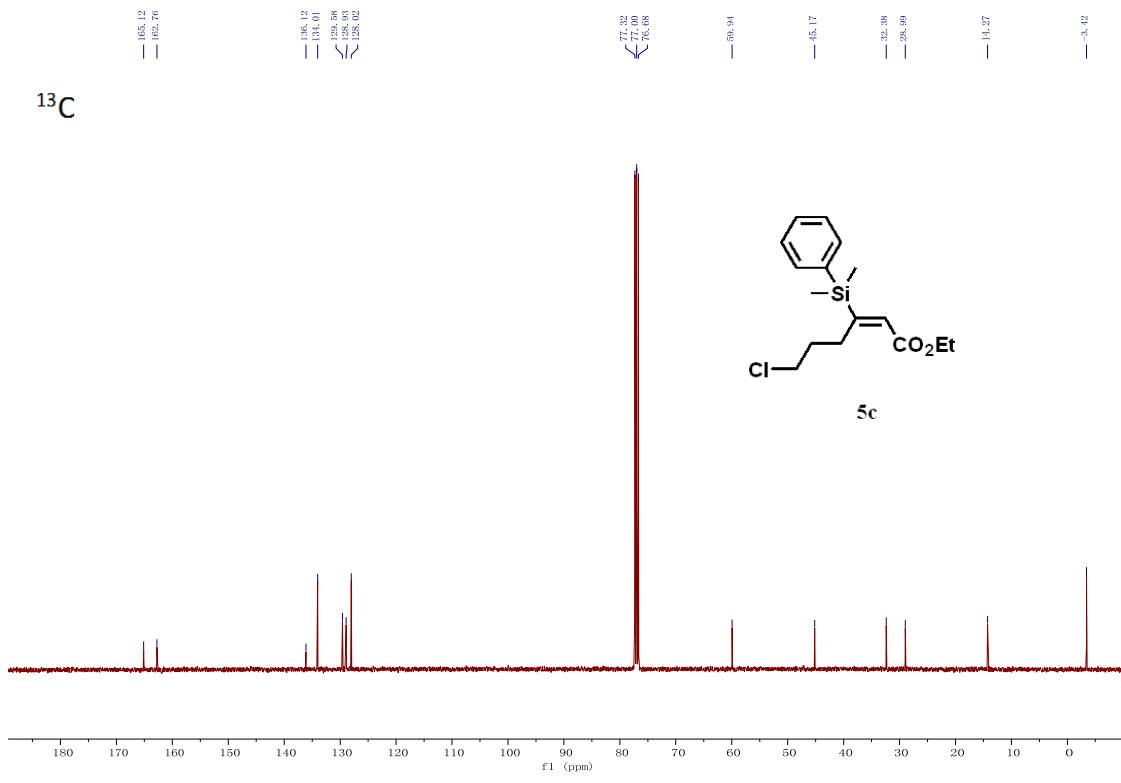







NOE-1D

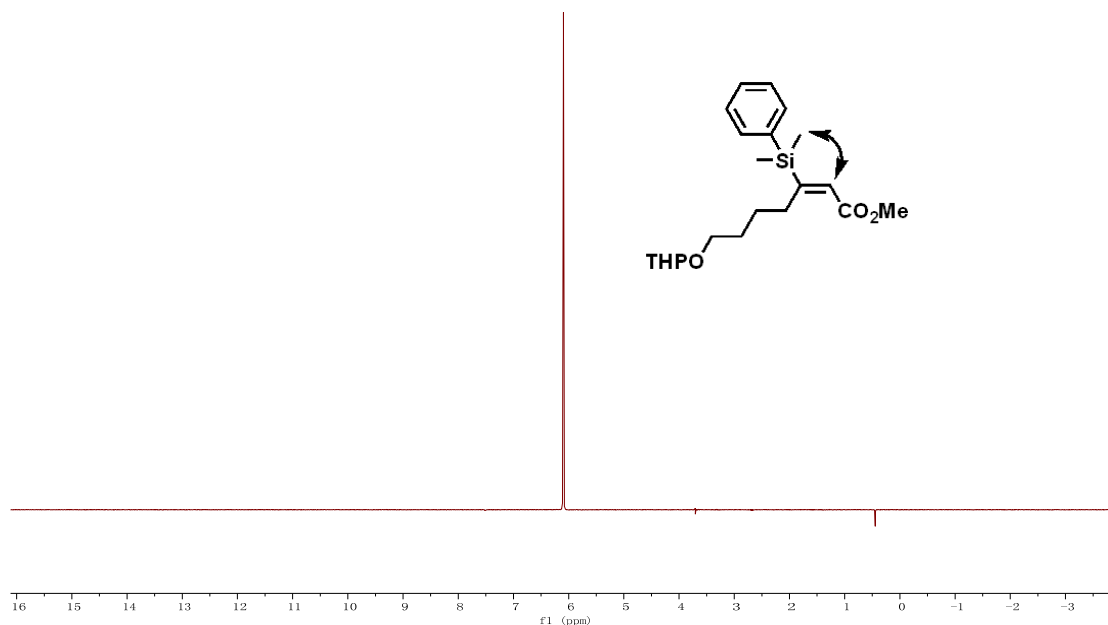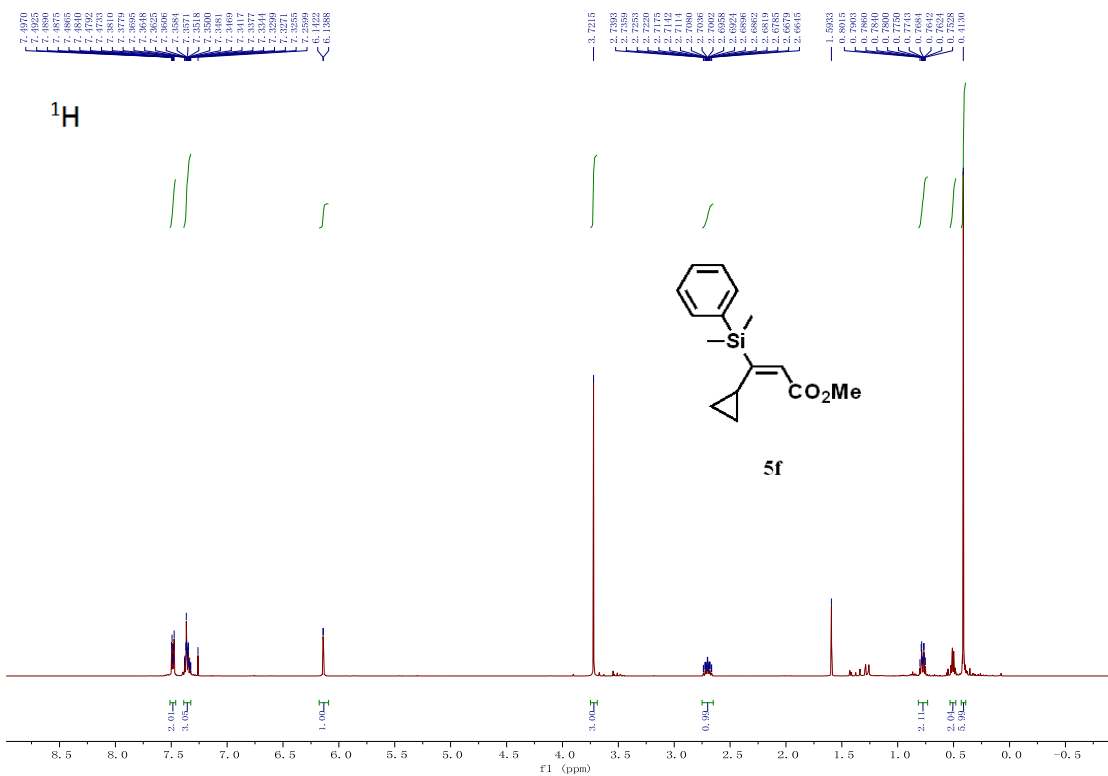

<sup>13</sup>C

165.42  
161.56  
137.25  
133.83  
129.35  
128.96  
127.59

77.32  
77.00  
76.68

51.02

15.26

7.99

-1.65

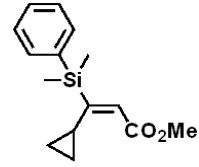

5f

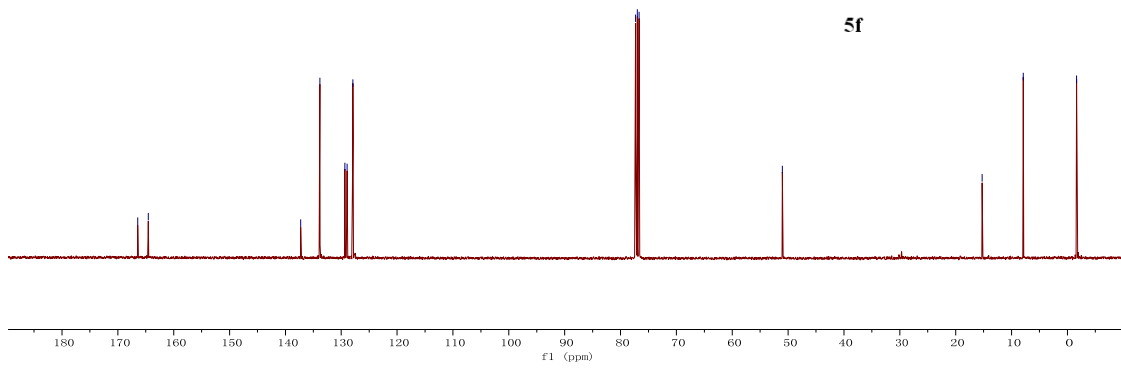

<sup>1</sup>H

7.6128  
7.5977  
7.5927  
7.5888  
7.5862  
7.5831  
7.5801  
7.5771  
7.5741  
7.5711  
7.5686  
7.5655  
7.5625  
7.5595  
7.5565  
7.5535  
7.5505  
7.5475  
7.5445  
7.5415  
7.5385  
7.5355  
7.5325  
7.5295  
7.5265  
7.5235  
7.5205  
7.5175  
7.5145  
7.5115  
7.5085  
7.5055  
7.5025  
7.4995  
7.4965  
7.4935  
7.4905  
7.4875  
7.4845  
7.4815  
7.4785  
7.4755  
7.4725  
7.4695  
7.4665  
7.4635  
7.4605  
7.4575  
7.4545  
7.4515  
7.4485  
7.4455  
7.4425  
7.4395  
7.4365  
7.4335  
7.4305  
7.4275  
7.4245  
7.4215  
7.4185  
7.4155  
7.4125  
7.4095  
7.4065  
7.4035  
7.4005  
7.3975  
7.3945  
7.3915  
7.3885  
7.3855  
7.3825  
7.3795  
7.3765  
7.3735  
7.3705  
7.3675  
7.3645  
7.3615  
7.3585  
7.3555  
7.3525  
7.3495  
7.3465  
7.3435  
7.3405  
7.3375  
7.3345  
7.3315  
7.3285  
7.3255  
7.3225  
7.3195  
7.3165  
7.3135  
7.3105  
7.3075  
7.3045  
7.3015  
7.2985  
7.2955  
7.2925  
7.2895  
7.2865  
7.2835  
7.2805  
7.2775  
7.2745  
7.2715  
7.2685  
7.2655  
7.2625  
7.2595  
7.2565  
7.2535  
7.2505  
7.2475  
7.2445  
7.2415  
7.2385  
7.2355  
7.2325  
7.2295  
7.2265  
7.2235  
7.2205  
7.2175  
7.2145  
7.2115  
7.2085  
7.2055  
7.2025  
7.1995  
7.1965  
7.1935  
7.1905  
7.1875  
7.1845  
7.1815  
7.1785  
7.1755  
7.1725  
7.1695  
7.1665  
7.1635  
7.1605  
7.1575  
7.1545  
7.1515  
7.1485  
7.1455  
7.1425  
7.1395  
7.1365  
7.1335  
7.1305  
7.1275  
7.1245  
7.1215  
7.1185  
7.1155  
7.1125  
7.1095  
7.1065  
7.1035  
7.1005  
7.0975  
7.0945  
7.0915  
7.0885  
7.0855  
7.0825  
7.0795  
7.0765  
7.0735  
7.0705  
7.0675  
7.0645  
7.0615  
7.0585  
7.0555  
7.0525  
7.0495  
7.0465  
7.0435  
7.0405  
7.0375  
7.0345  
7.0315  
7.0285  
7.0255  
7.0225  
7.0195  
7.0165  
7.0135  
7.0105  
7.0075  
7.0045  
7.0015  
6.9985  
6.9955  
6.9925  
6.9895  
6.9865  
6.9835  
6.9805  
6.9775  
6.9745  
6.9715  
6.9685  
6.9655  
6.9625  
6.9595  
6.9565  
6.9535  
6.9505  
6.9475  
6.9445  
6.9415  
6.9385  
6.9355  
6.9325  
6.9295  
6.9265  
6.9235  
6.9205  
6.9175  
6.9145  
6.9115  
6.9085  
6.9055  
6.9025  
6.8995  
6.8965  
6.8935  
6.8905  
6.8875  
6.8845  
6.8815  
6.8785  
6.8755  
6.8725  
6.8695  
6.8665  
6.8635  
6.8605  
6.8575  
6.8545  
6.8515  
6.8485  
6.8455  
6.8425  
6.8395  
6.8365  
6.8335  
6.8305  
6.8275  
6.8245  
6.8215  
6.8185  
6.8155  
6.8125  
6.8095  
6.8065  
6.8035  
6.8005  
6.7975  
6.7945  
6.7915  
6.7885  
6.7855  
6.7825  
6.7795  
6.7765  
6.7735  
6.7705  
6.7675  
6.7645  
6.7615  
6.7585  
6.7555  
6.7525  
6.7495  
6.7465  
6.7435  
6.7405  
6.7375  
6.7345  
6.7315  
6.7285  
6.7255  
6.7225  
6.7195  
6.7165  
6.7135  
6.7105  
6.7075  
6.7045  
6.7015  
6.6985  
6.6955  
6.6925  
6.6895  
6.6865  
6.6835  
6.6805  
6.6775  
6.6745  
6.6715  
6.6685  
6.6655  
6.6625  
6.6595  
6.6565  
6.6535  
6.6505  
6.6475  
6.6445  
6.6415  
6.6385  
6.6355  
6.6325  
6.6295  
6.6265  
6.6235  
6.6205  
6.6175  
6.6145  
6.6115  
6.6085  
6.6055  
6.6025  
6.5995  
6.5965  
6.5935  
6.5905  
6.5875  
6.5845  
6.5815  
6.5785  
6.5755  
6.5725  
6.5695  
6.5665  
6.5635  
6.5605  
6.5575  
6.5545  
6.5515  
6.5485  
6.5455  
6.5425  
6.5395  
6.5365  
6.5335  
6.5305  
6.5275  
6.5245  
6.5215  
6.5185  
6.5155  
6.5125  
6.5095  
6.5065  
6.5035  
6.5005  
6.4975  
6.4945  
6.4915  
6.4885  
6.4855  
6.4825  
6.4795  
6.4765  
6.4735  
6.4705  
6.4675  
6.4645  
6.4615  
6.4585  
6.4555  
6.4525  
6.4495  
6.4465  
6.4435  
6.4405  
6.4375  
6.4345  
6.4315  
6.4285  
6.4255  
6.4225  
6.4195  
6.4165  
6.4135  
6.4105  
6.4075  
6.4045  
6.4015  
6.3985  
6.3955  
6.3925  
6.3895  
6.3865  
6.3835  
6.3805  
6.3775  
6.3745  
6.3715  
6.3685  
6.3655  
6.3625  
6.3595  
6.3565  
6.3535  
6.3505  
6.3475  
6.3445  
6.3415  
6.3385  
6.3355  
6.3325  
6.3295  
6.3265  
6.3235  
6.3205  
6.3175  
6.3145  
6.3115  
6.3085  
6.3055  
6.3025  
6.2995  
6.2965  
6.2935  
6.2905  
6.2875  
6.2845  
6.2815  
6.2785  
6.2755  
6.2725  
6.2695  
6.2665  
6.2635  
6.2605  
6.2575  
6.2545  
6.2515  
6.2485  
6.2455  
6.2425  
6.2395  
6.2365  
6.2335  
6.2305  
6.2275  
6.2245  
6.2215  
6.2185  
6.2155  
6.2125  
6.2095  
6.2065  
6.2035  
6.2005  
6.1975  
6.1945  
6.1915  
6.1885  
6.1855  
6.1825  
6.1795  
6.1765  
6.1735  
6.1705  
6.1675  
6.1645  
6.1615  
6.1585  
6.1555  
6.1525  
6.1495  
6.1465  
6.1435  
6.1405  
6.1375  
6.1345  
6.1315  
6.1285  
6.1255  
6.1225  
6.1195  
6.1165  
6.1135  
6.1105  
6.1075  
6.1045  
6.1015  
6.0985  
6.0955  
6.0925  
6.0895  
6.0865  
6.0835  
6.0805  
6.0775  
6.0745  
6.0715  
6.0685  
6.0655  
6.0625  
6.0595  
6.0565  
6.0535  
6.0505  
6.0475  
6.0445  
6.0415  
6.0385  
6.0355  
6.0325  
6.0295  
6.0265  
6.0235  
6.0205  
6.0175  
6.0145  
6.0115  
6.0085  
6.0055  
6.0025  
5.9995  
5.9965  
5.9935  
5.9905  
5.9875  
5.9845  
5.9815  
5.9785  
5.9755  
5.9725  
5.9695  
5.9665  
5.9635  
5.9605  
5.9575  
5.9545  
5.9515  
5.9485  
5.9455  
5.9425  
5.9395  
5.9365  
5.9335  
5.9305  
5.9275  
5.9245  
5.9215  
5.9185  
5.9155  
5.9125  
5.9095  
5.9065  
5.9035  
5.9005  
5.8975  
5.8945  
5.8915  
5.8885  
5.8855  
5.8825  
5.8795  
5.8765  
5.8735  
5.8705  
5.8675  
5.8645  
5.8615  
5.8585  
5.8555  
5.8525  
5.8495  
5.8465  
5.8435  
5.8405  
5.8375  
5.8345  
5.8315  
5.8285  
5.8255  
5.8225  
5.8195  
5.8165  
5.8135  
5.8105  
5.8075  
5.8045  
5.8015  
5.7985  
5.7955  
5.7925  
5.7895  
5.7865  
5.7835  
5.7805  
5.7775  
5.7745  
5.7715  
5.7685  
5.7655  
5.7625  
5.7595  
5.7565  
5.7535  
5.7505  
5.7475  
5.7445  
5.7415  
5.7385  
5.7355  
5.7325  
5.7295  
5.7265  
5.7235  
5.7205  
5.7175  
5.7145  
5.7115  
5.7085  
5.7055  
5.7025  
5.6995  
5.6965  
5.6935  
5.6905  
5.6875  
5.6845  
5.6815  
5.6785  
5.6755  
5.6725  
5.6695  
5.6665  
5.6635  
5.6605  
5.6575  
5.6545  
5.6515  
5.6485  
5.6455  
5.6425  
5.6395  
5.6365  
5.6335  
5.6305  
5.6275  
5.6245  
5.6215  
5.6185  
5.6155  
5.6125  
5.6095  
5.6065  
5.6035  
5.6005  
5.5975  
5.5945  
5.5915  
5.5885  
5.5855  
5.5825  
5.5795  
5.5765  
5.5735  
5.5705  
5.5675  
5.5645  
5.5615  
5.5585  
5.5555  
5.5525  
5.5495  
5.5465  
5.5435  
5.5405  
5.5375  
5.5345  
5.5315  
5.5285  
5.5255  
5.5225  
5.5195  
5.5165  
5.5135  
5.5105  
5.5075  
5.5045  
5.5015  
5.4985  
5.4955  
5.4925  
5.4895  
5.4865  
5.4835  
5.4805  
5.4775  
5.4745  
5.4715  
5.4685  
5.4655  
5.4625  
5.4595  
5.4565  
5.4535  
5.4505  
5.4475  
5.4445  
5.4415  
5.4385  
5.4355  
5.4325  
5.4295  
5.4265  
5.4235  
5.4205  
5.4175  
5.4145  
5.4115  
5.4085  
5.4055  
5.4025  
5.3995  
5.3965  
5.3935  
5.3905  
5.3875  
5.3845  
5.3815  
5.3785  
5.3755  
5.3725  
5.3695  
5.3665  
5.3635  
5.3605  
5.3575  
5.3545  
5.3515  
5.3485  
5.3455  
5.3425  
5.3395  
5.3365  
5.3335  
5.3305  
5.3275  
5.3245  
5.3215  
5.3185  
5.3155  
5.3125  
5.3095  
5.3065  
5.3035  
5.3005  
5.2975  
5.2945  
5.2915  
5.2885  
5.2855  
5.2825  
5.2795  
5.2765  
5.2735  
5.2705  
5.2675  
5.2645  
5.2615  
5.2585  
5.2555  
5.2525  
5.2495  
5.2465  
5.2435  
5.2405  
5.2375  
5.2345  
5.2315  
5.2285  
5.2255  
5.2225  
5.2195  
5.2165  
5.2135  
5.2105  
5.2075  
5.2045  
5.2015  
5.1985  
5.1955  
5.1925  
5.1895  
5.1865  
5.1835  
5.1805  
5.1775  
5.1745  
5.1715  
5.1685  
5.1655  
5.1625  
5.1595  
5.1565  
5.1535  
5.1505  
5.1475  
5.1445  
5.1415  
5.1385  
5.1355  
5.1325  
5.1295  
5.1265  
5.1235  
5.1205  
5.1175  
5.1145  
5.1115  
5.1085  
5.1055  
5.1025  
5.0995  
5.0965  
5.0935  
5.0905  
5.0875  
5.0845  
5.0815  
5.0785  
5.0755  
5.0725  
5.0695  
5.0665  
5.0635  
5.0605  
5.0575  
5.0545  
5.0515  
5.0485  
5.0455  
5.0425  
5.0395  
5.0365  
5.0335  
5.0305  
5.0275  
5.0245  
5.0215  
5.0185  
5.0155  
5.0125  
5.0095  
5.0065  
5.0035  
4.9995  
4.9965  
4.9935  
4.9905  
4.9875  
4.9845  
4.9815  
4.9785  
4.9755  
4.9725  
4.9695  
4.9665  
4.9635  
4.9605  
4.9575  
4.9545  
4.9515  
4.9485  
4.9455  
4.9425  
4.9395  
4.9365  
4.9335  
4.9305  
4.9275  
4.9245  
4.9215  
4.9185  
4.9155  
4.9125  
4.9095  
4.9065  
4.9035  
4.9005  
4.8975  
4.8945  
4.8915  
4.8885  
4.8855  
4.8825  
4.8795  
4.8765  
4.8735  
4.8705  
4.8675  
4.8645  
4.8615  
4.8585  
4.8555  
4.8525  
4.8495  
4.8465  
4.8435  
4.8405  
4.8375  
4.8345  
4.8315  
4.8285  
4.8255  
4.8225  
4.8195  
4.8165  
4.8135  
4.8105  
4.8075  
4.8045  
4.8015  
4.7985  
4.7955  
4.7925  
4.7895  
4.7865  
4.7835  
4.7805  
4.7775  
4.7745  
4.7715  
4.7685  
4.7655  
4.7625  
4.7595  
4.7565  
4.7535  
4.7505  
4.7475  
4.7445  
4.7415  
4.7385  
4.7355  
4.7325  
4.7295  
4.7265  
4.7235  
4.7205  
4.7175  
4.7145  
4.7115  
4.7085  
4.7055  
4.7025  
4.6995  
4.6965  
4.6935  
4.6905  
4.6875  
4.6845  
4.6815  
4.6785  
4.6755  
4.6725  
4.6695  
4.6665  
4.6635  
4.6605  
4.6575  
4.6545  
4.6515  
4.6485  
4.6455  
4.6425  
4.6395  
4.6365  
4.6335  
4.6305  
4.6275  
4.6245  
4.6215  
4.6185  
4.6155  
4.6125  
4.6095  
4.6065  
4.6035  
4.6005  
4.5975  
4.5945  
4.5915  
4.5885  
4.5855  
4.5825  
4.5795  
4.5765  
4.5735  
4.5705  
4.5675  
4.5645  
4.5615  
4.5585  
4.5555  
4.5525  
4.5495  
4.5465  
4.5435  
4.5405  
4.5375  
4.5345  
4.5315  
4.5285  
4.5255  
4.5225  
4.5195  
4.5165  
4.5135  
4.5105  
4.5075  
4.5045  
4.5015  
4.4985  
4.4955  
4.4925  
4.4895  
4.4865  
4.4835  
4.4805  
4.4775  
4.4745  
4.4715  
4.4685  
4.4655  
4.4625  
4.4595  
4.4565  
4.4535  
4.4505  
4.4475  
4.4445  
4.4415  
4.4385  
4.4355  
4.4325  
4.4295  
4.4265  
4.4235  
4.4205  
4.4175  
4.4145  
4.4115  
4.4085  
4.4055  
4.4025  
4.3995  
4.3965  
4.3935  
4.3905  
4.3875  
4.3845  
4.3815  
4.3785  
4.3755  
4.3725  
4.3695  
4.3665  
4.3635  
4.3605  
4.3575  
4.3545  
4.3515  
4.3485  
4.3455  
4.3425  
4.3395  
4.3365  
4.3335  
4.3305  
4.3275  
4.3245  
4.3215  
4.3185  
4.3155  
4.3125  
4.3095  
4.3065  
4.3035  
4.3005  
4.2975  
4.2945  
4.2915  
4.2885  
4.2855  
4.2825  
4.2795  
4.2765  
4.2735  
4.2705  
4.2675  
4.2645  
4.2615  
4.2585  
4.2555  
4.2525  
4.2495  
4.2465  
4.2435  
4.2405  
4.2375  
4.2345  
4.2315  
4.2285  
4.2255  
4.2225  
4.2195  
4.2165  
4.2135  
4.2105  
4.2075  
4.2045  
4.2015  
4.1985  
4.1955  
4.1925  
4.1895  
4.1865  
4.1835  
4.1805  
4.1775  
4.1745  
4.1715  
4.1685  
4.1655  
4.1625  
4.1595  
4.1565  
4.1535  
4.1505  
4.1475  
4.1445  
4.1415  
4.1385  
4.1355  
4.1325  
4.1295  
4.1265  
4.1235  
4.1205  
4.1175  
4.1145  
4.1115  
4.1085  
4.1055  
4.1025  
4.0995  
4.0965  
4.0935  
4.0905  
4.0875  
4.0845  
4.0815  
4.0785  
4.0755  
4.0725  
4.0695  
4.0665  
4.0635  
4.0605  
4.0575  
4.0545  
4.0515  
4.0485  
4.0455  
4.0425  
4.0395  
4.0365  
4.0335  
4.0305  
4.0275  
4.0245  
4.0215  
4.0185  
4.0155  
4.0125  
4.0095  
4.0065  
4.0035  
3.9995  
3.9965  
3.9935  
3.9905  
3.9875  
3.9845  
3.9815  
3.9785  
3.9755  
3.9725  
3.9695  
3.9665  
3.9635  
3.9605  
3.9575  
3.9545  
3.9515  
3.9485  
3.9455  
3.9425  
3.9395  
3.9365  
3.9335  
3.9305  
3.9275  
3.9245  
3.9215  
3.9185  
3.9155  
3.9125  
3.9095  
3.9065  
3.9035  
3.9005  
3.8975  
3.8945  
3.8915  
3.8885  
3.8855  
3.8825  
3.8795  
3.8765  
3.8735  
3.8705  
3.8675  
3.8645  
3.8615  
3.8585  
3.8555  
3.8525  
3.8495  
3.8465  
3.8435  
3.8405  
3.8375  
3.8345  
3.8315  
3.8285  
3.8255  
3.8225  
3.8195  
3.8165  
3.8135  
3.8105  
3.8075  
3.8045  
3.8015  
3.7985  
3.7955  
3.7925  
3.7895  
3.7865  
3.7835  
3.7805  
3.7775  
3.7745  
3.7715  
3.7685  
3.7655  
3.7625  
3.7595  
3.7565  
3.7535  
3.7505  
3.7475  
3.7445  
3.7415  
3.7385  
3.7355  
3.7325  
3.7295  
3.7265  
3.7235  
3.7205  
3.7175  
3.7145  
3.7115  
3.7085  
3.7055  
3.7025  
3.6995  
3.6965  
3.6935  
3.6905  
3.6875  
3.6845  
3.6815  
3.6785  
3.6755  
3.6725  
3.6695  
3.6665  
3.6635  
3.6605  
3.6575  
3.6545  
3.6515  
3.6485  
3.6455  
3.6425  
3.6395  
3.6365  
3.6335  
3.6305  
3.6275  
3.6245  
3.6215  
3.6185  
3.6155  
3.6125  
3.6095  
3.6065  
3.6035  
3.6005  
3.5975  
3.5945  
3.5915  
3.5885  
3.5855  
3.5825  
3.5795  
3.5765  
3.5735  
3.5705  
3.5675  
3.5645  
3.5615  
3.5585  
3.5555  
3.5525  
3.5495  
3.5465  
3.5435  
3.5405  
3.5375  
3.5345  
3.5315  
3.5285  
3.5255  
3.5225  
3.5195  
3.5165  
3.5135  
3.5105  
3.5075  
3.5045  
3.5015  
3.4985  
3.4955  
3.4925  
3.4895  
3.4865  
3.4835  
3.4805  
3.4775  
3.4745  
3.4715  
3.4685  
3.4655  
3.4625  
3.4595  
3.4565  
3.4535  
3.4505  
3.4475  
3.4445  
3.4415  
3.4385  
3.4355  
3.4325  
3.4295  
3.4265  
3.4235  
3.4205  
3.4175  
3.4145  
3.4115  
3.4085  
3.4055  
3.4025  
3.3995  
3.3965  
3.3935  
3.3905  
3.3875  
3.3845  
3.3815  
3.3785  
3.3755  
3.3725  
3.3695  
3.3665  
3.3635  
3.3605  
3.3575  
3.3545  
3.3515  
3.3485  
3.3455  
3.3425  
3.3395  
3.3365  
3.3335  
3.3305  
3.3275  
3.3245  
3.3215  
3.3185  
3.3155  
3.3125  
3.3095  
3.3065  
3.3035  
3.3005  
3.2975  
3.2945  
3.2915  
3.2885  
3.2855  
3.2825  
3.2795  
3.2765  
3.2735  
3.2705  
3.2675  
3.2645  
3.2615  
3.2585  
3.2555  
3.2525  
3.2495  
3.2465  
3.2435  
3.2405  
3.2375  
3.2345  
3.2315  
3.2285  
3.2255  
3.2225  
3.2195  
3.2165  
3.2135  
3.2105  
3.2075  
3.2045



<sup>13</sup>C

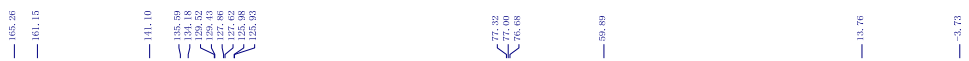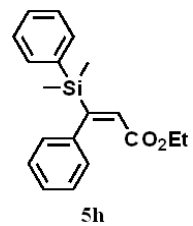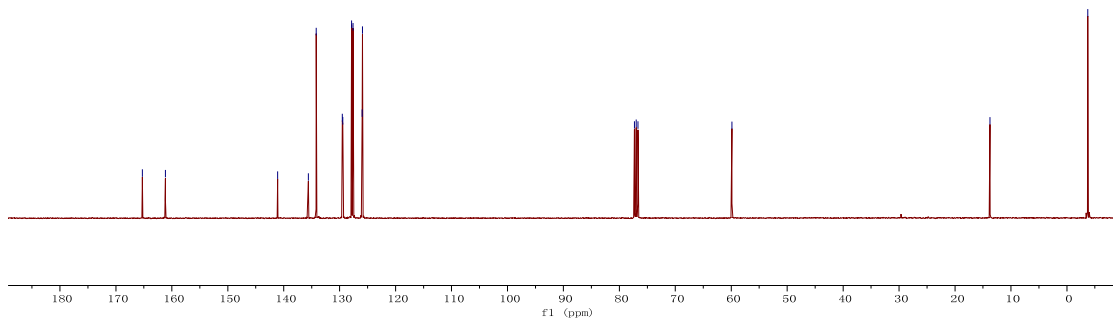

<sup>1</sup>H

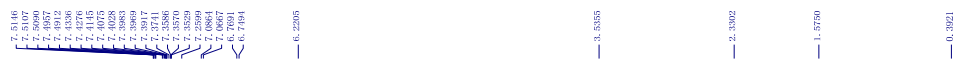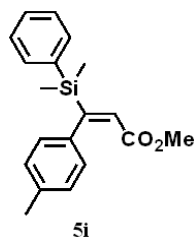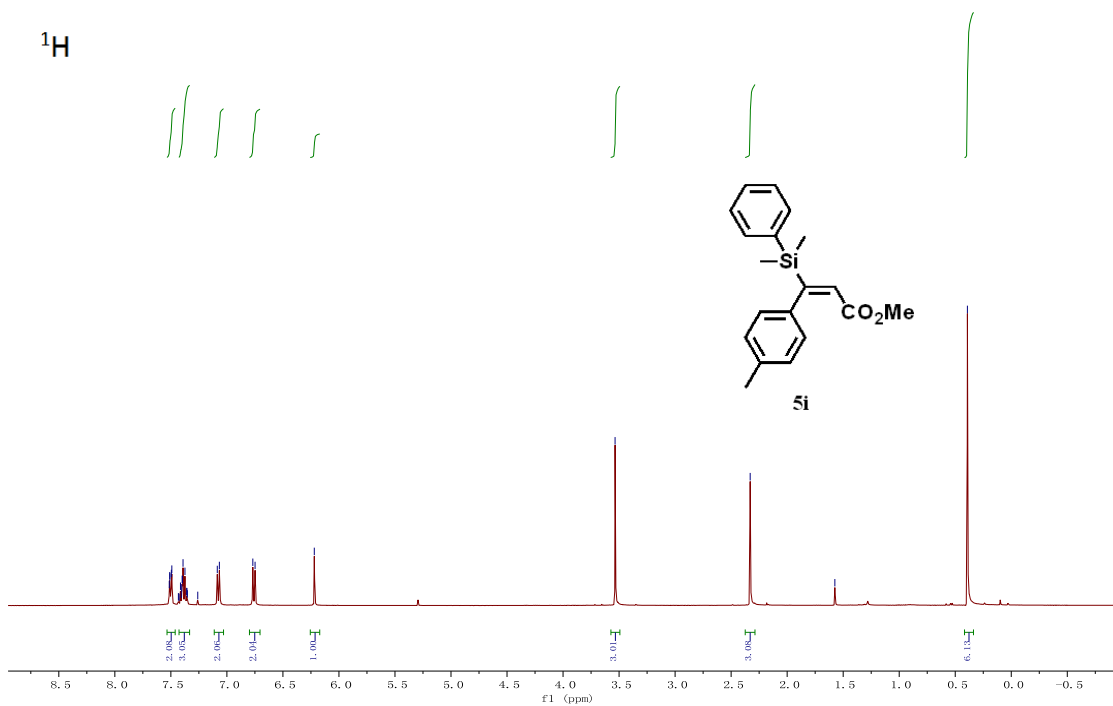



<sup>13</sup>C

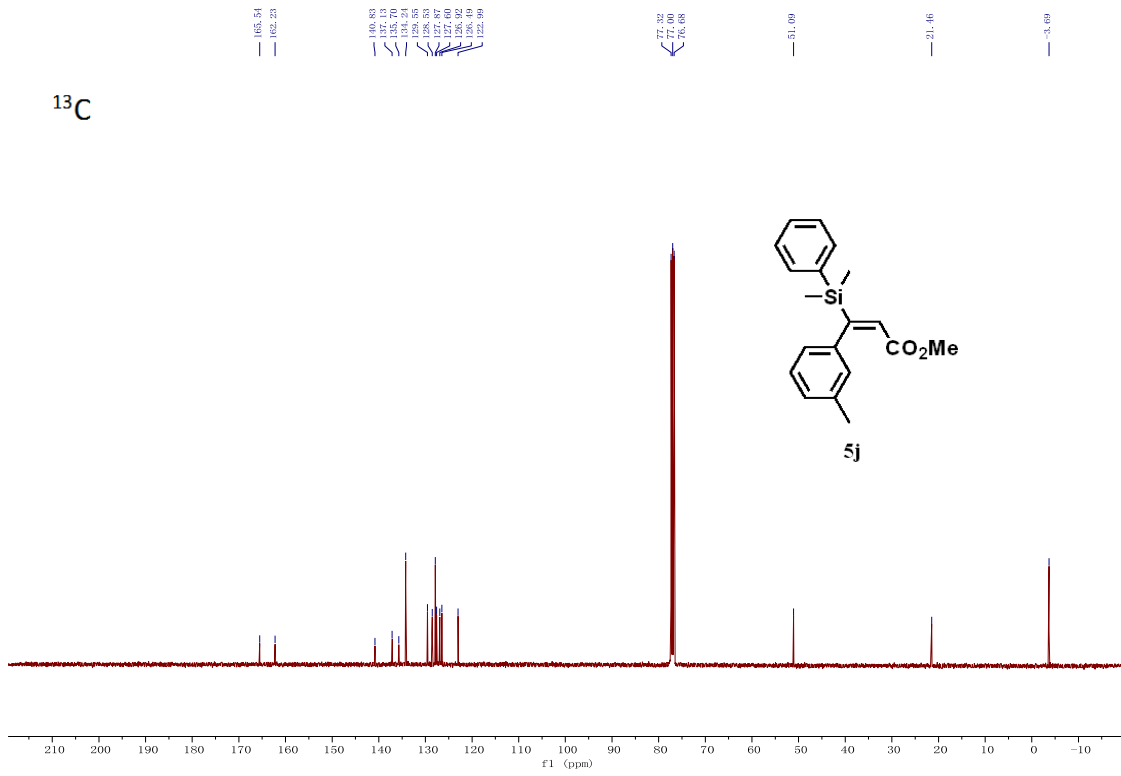

<sup>1</sup>H

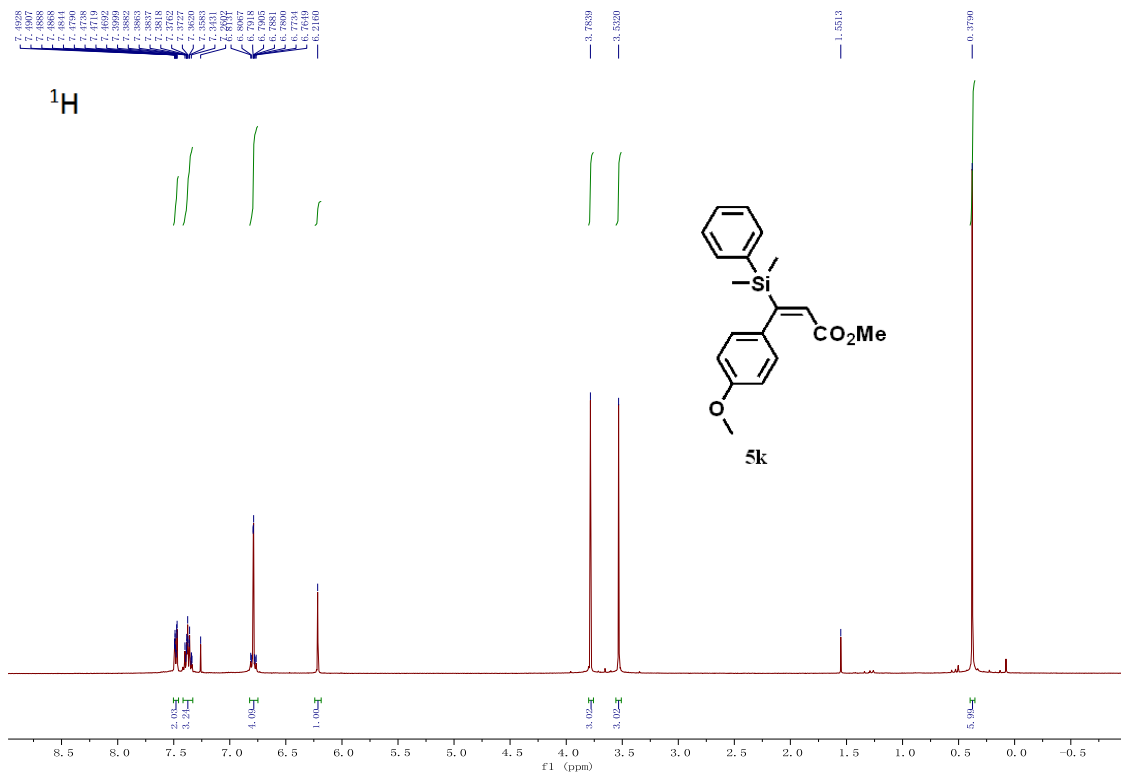

<sup>13</sup>C

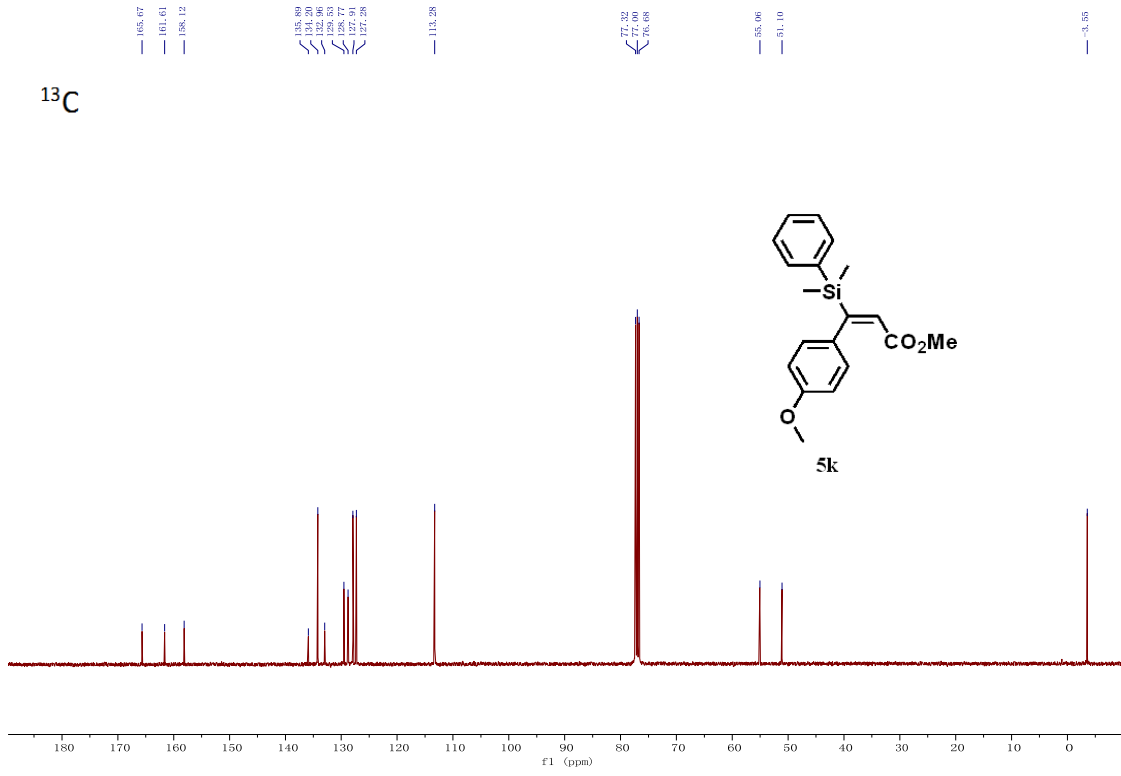

<sup>1</sup>H

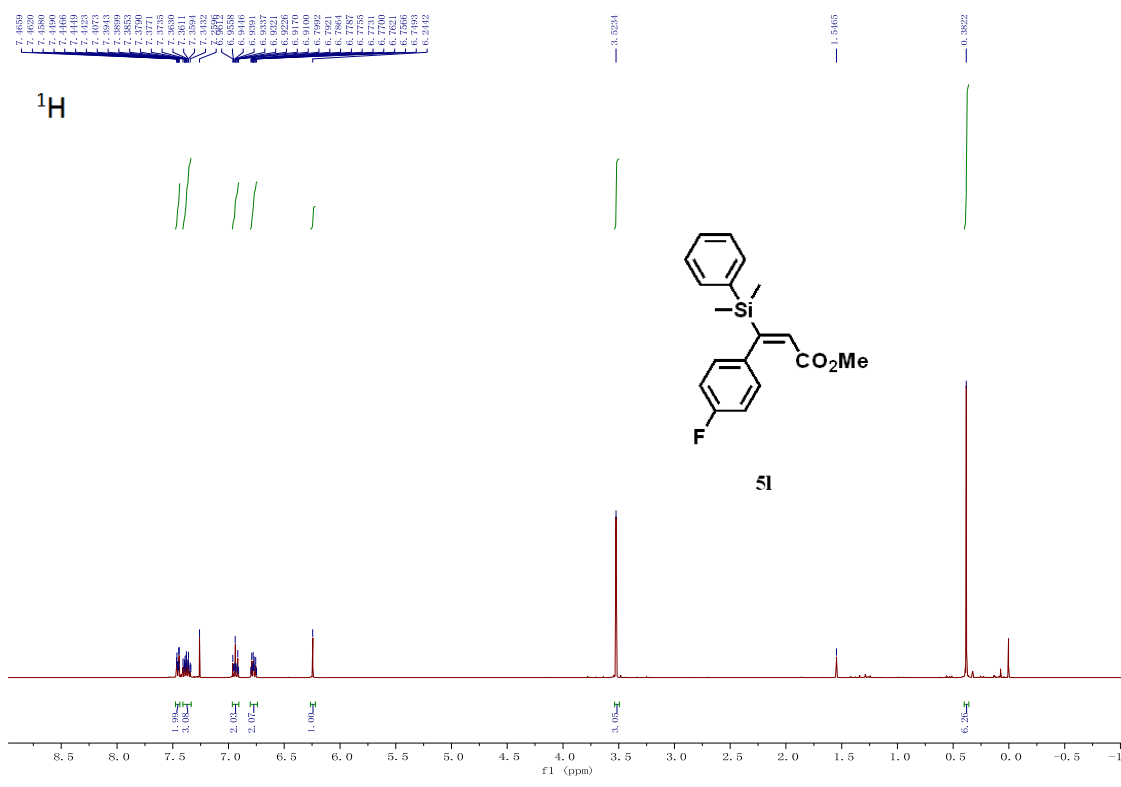



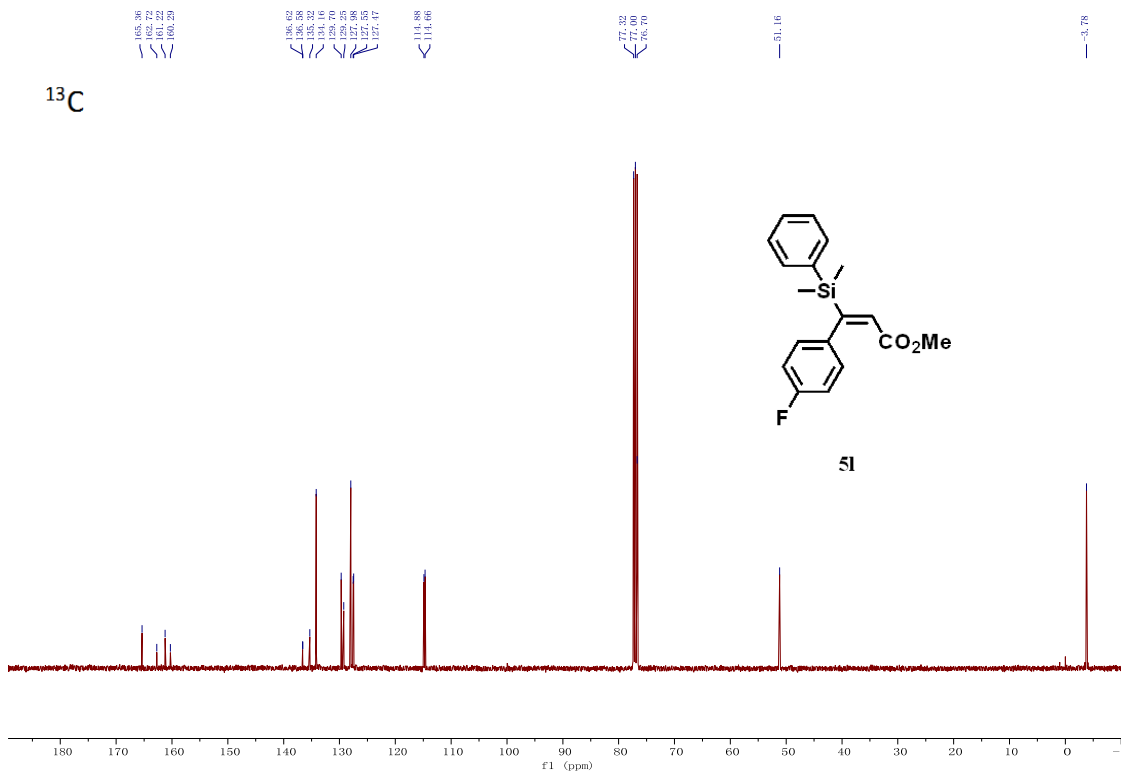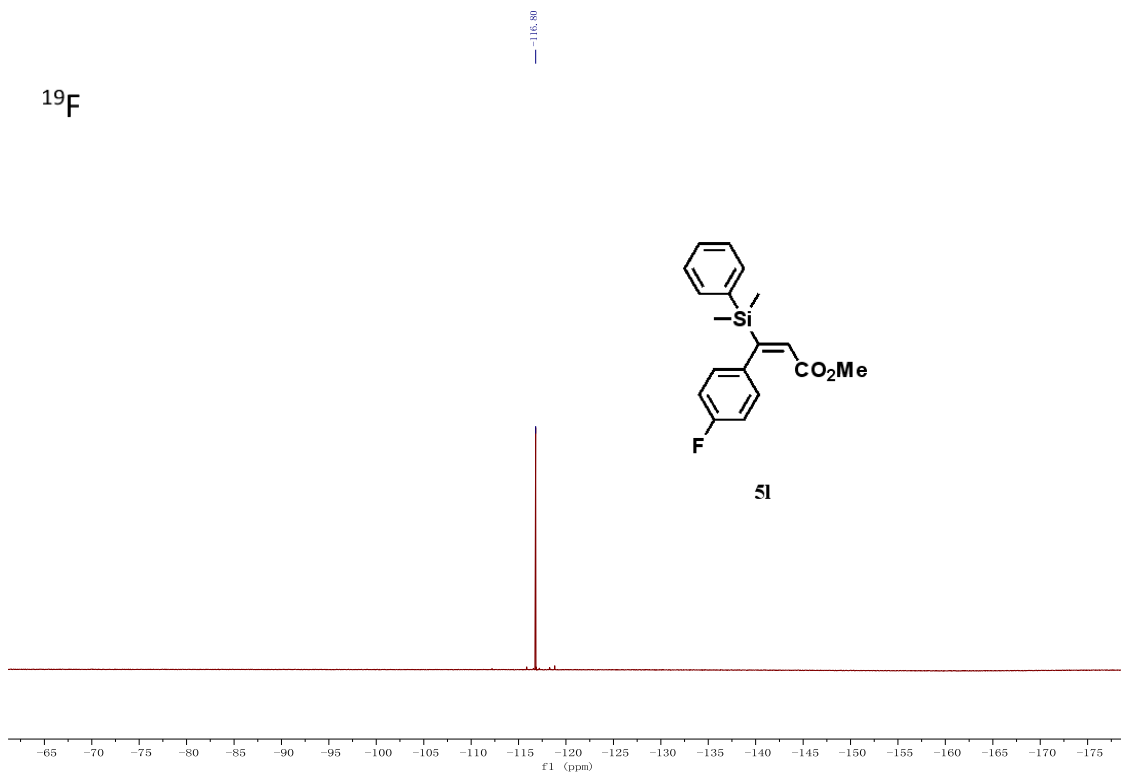



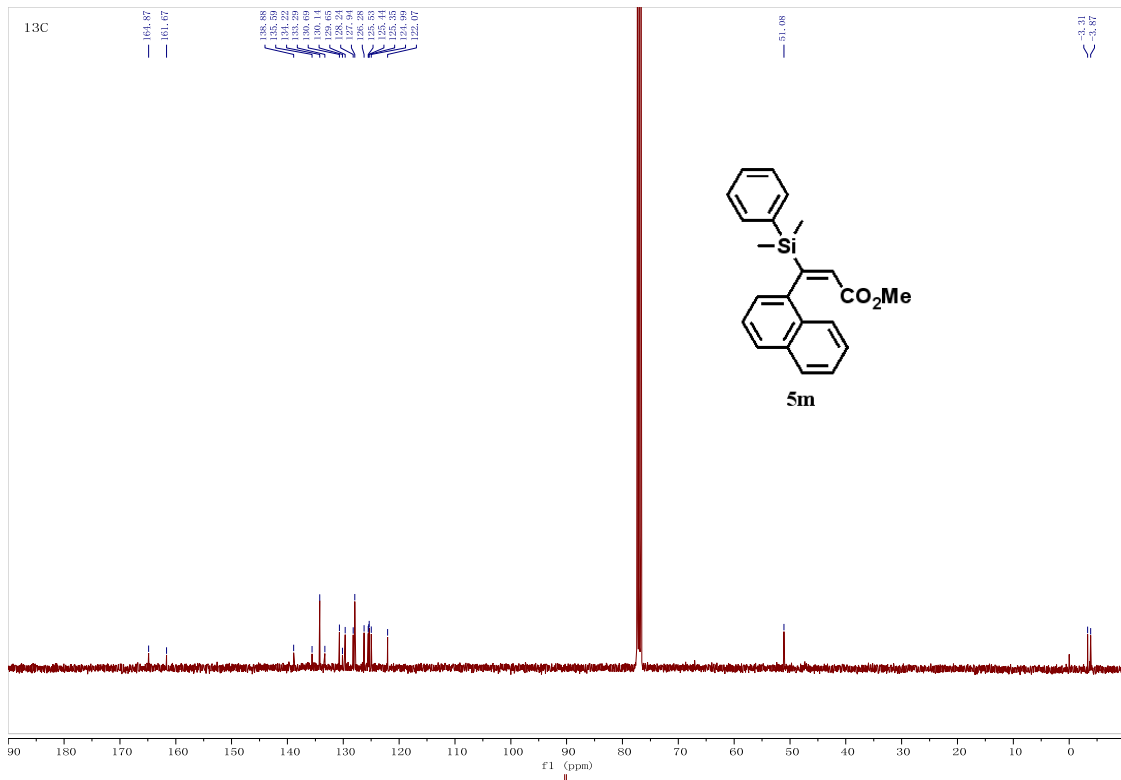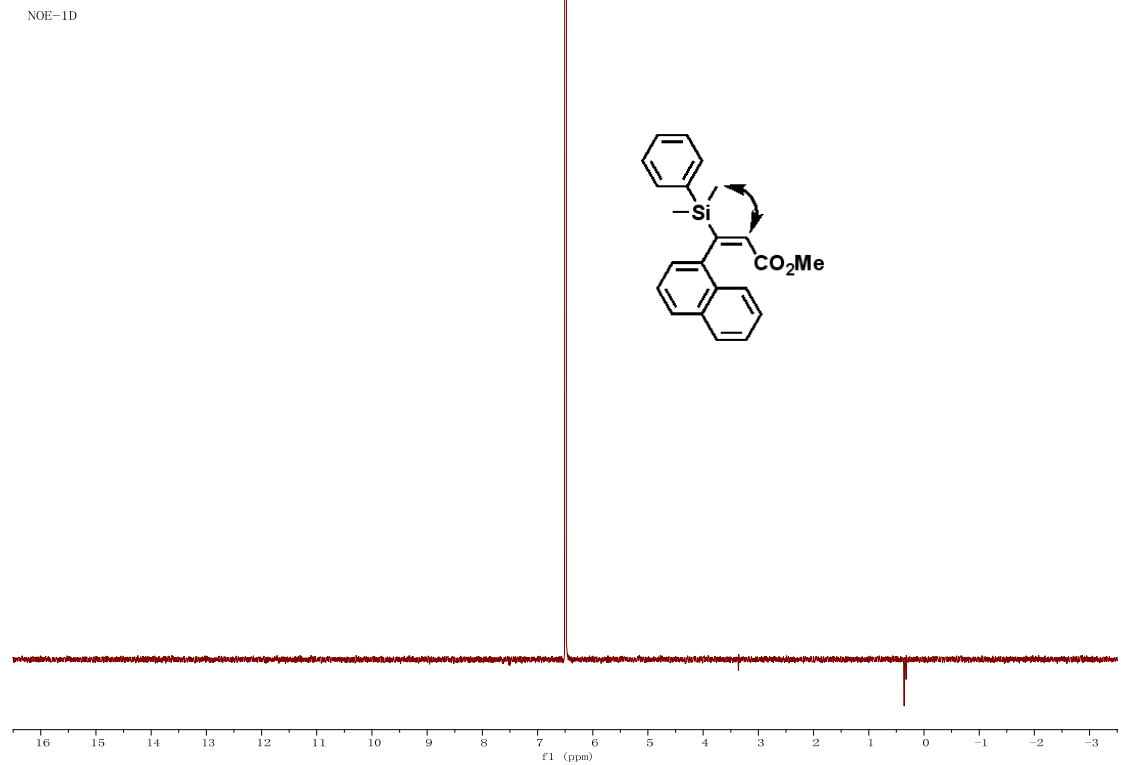

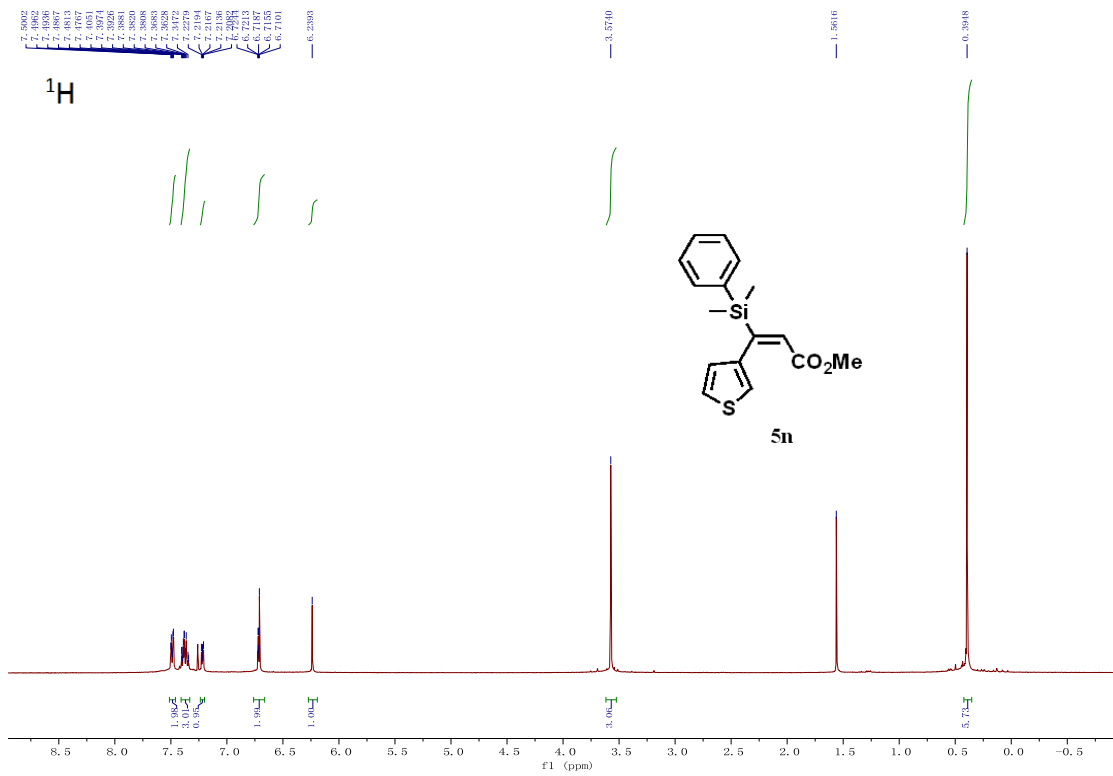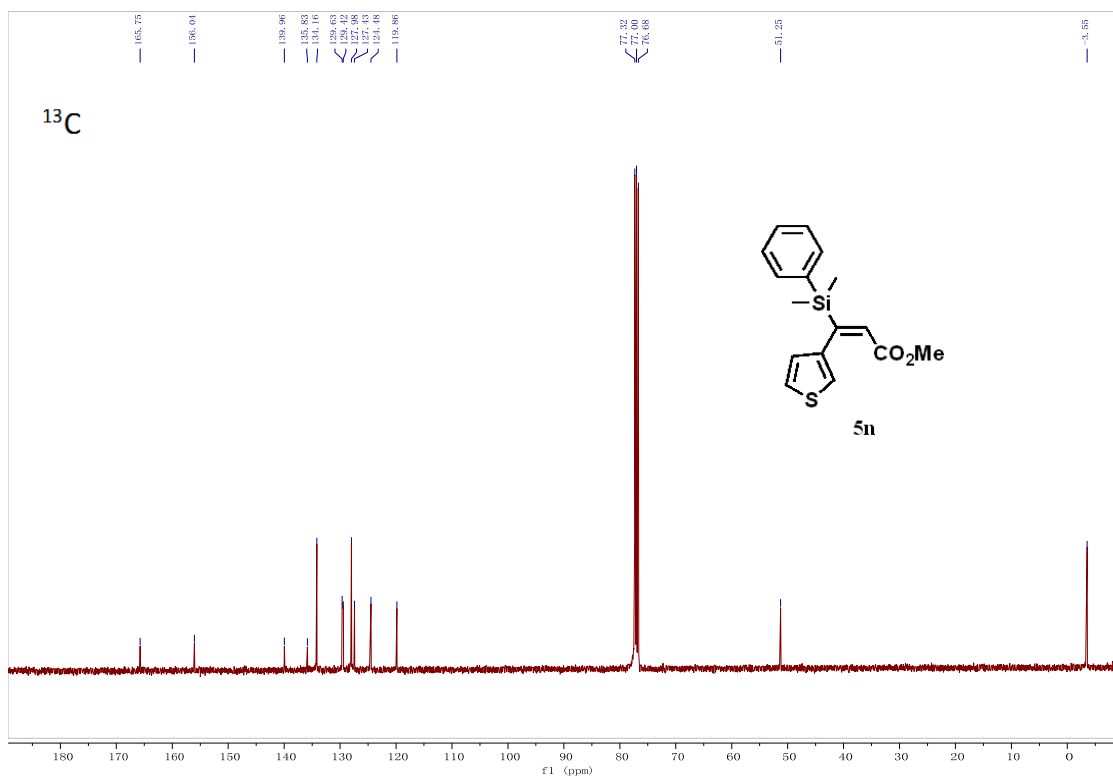

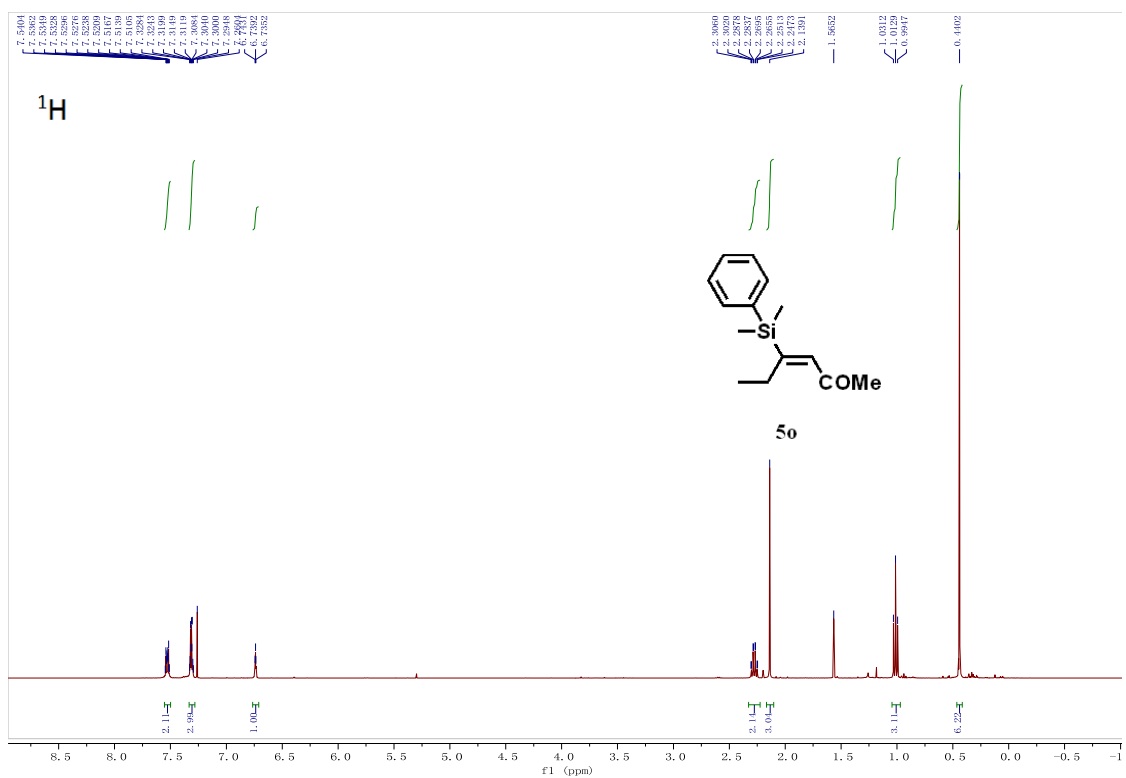

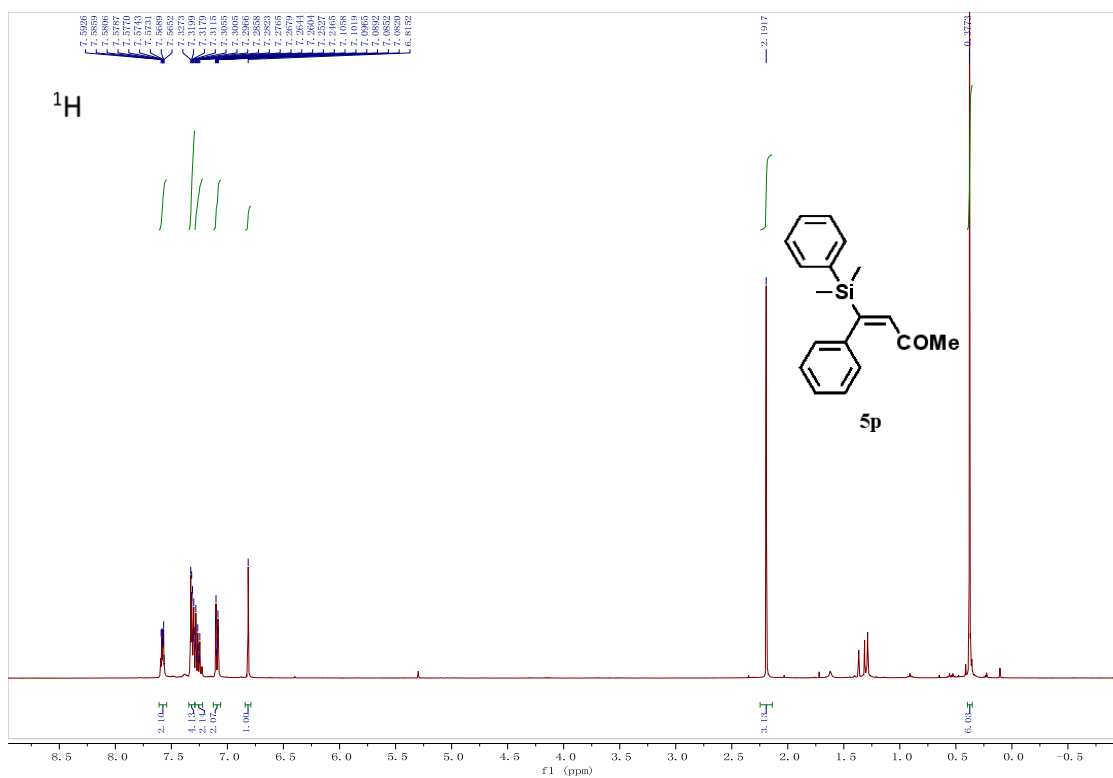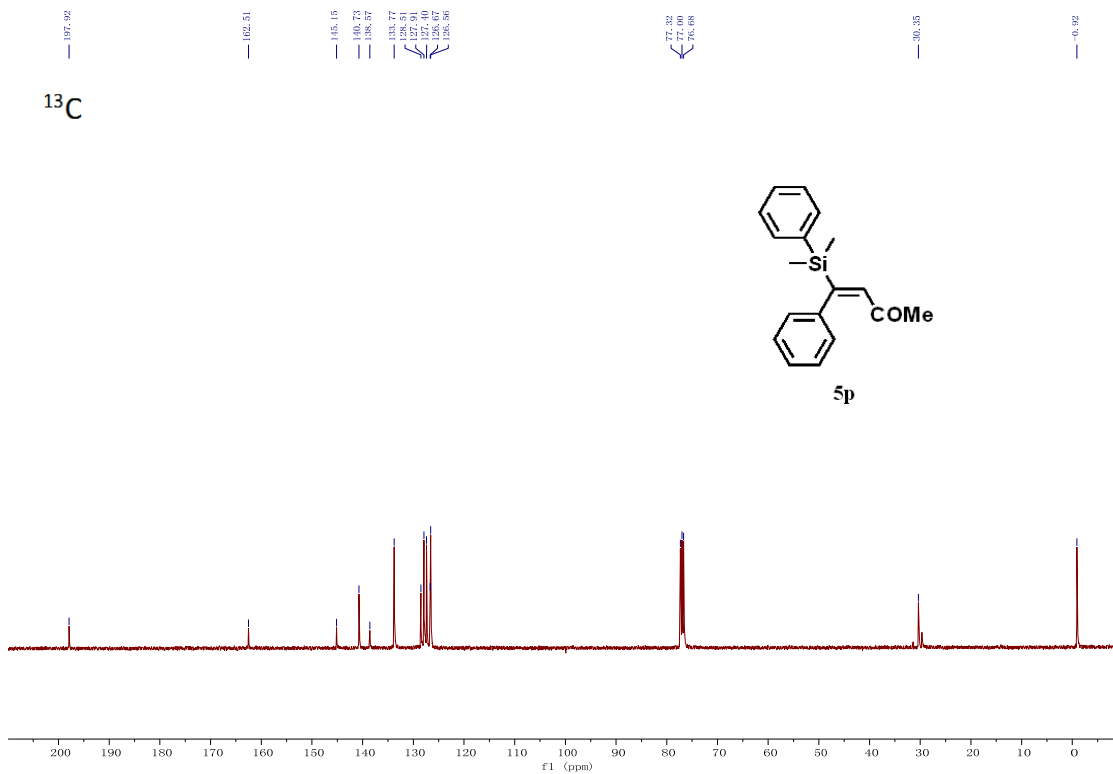

Supplement: c4cc01722f1.pdf [file c4cc01722f1.pdf]
